# Supplementary material for: A unified set of experimental organometallic data used to evaluate modern theoretical methods
Source: Royal Society of Chemistry journal article supplement (doi:10.1039/c6dt02763f), 2016-01-01
Supplement: c6dt02763f1.pdf [file c6dt02763f1.pdf]

**Supplementary Information For:**

**A Unified Set of Experimental Organometallic  
Data Used to Evaluate Modern Theoretical  
Methods**

**Rajesh K. Raju, Ashfaq A. Bengali and Edward N. Brothers\***

Department of Chemistry, Texas A&M University at Qatar, Doha, Qatar

Email: ed.brothers@qatar.tamu.edu

## Methods

### Computational details

All calculations were carried out using the development version of the GAUSSIAN suite of programs<sup>1</sup> using the **Def2-TZVPP** basis set.<sup>2</sup> We used a very large grid of 199 radial and 590 angular points in all calculations to avoid known integration issues with modern functionals.<sup>3,4</sup> We tested the performance of 101 DFT functionals, which span all categories of functional types, namely: Local spin density approximation (LSDA), generalized gradient approximation (GGA), hybrid GGA methods (HGGA), meta-GGA methods (MGGA), hybrid meta GGA functionals (HMGGGA), range separated HGGA methods (RS-HGGA) and double hybrid (DH) functionals. In addition, we included HF and MP2 as representatives of low cost wave function work for comparison. The methods used in the present benchmark study are summarized in **Table 2** in the main article.

### Test Set Specific Details

To lower computational cost, the study proceeded in the following way.

- (i) We first chose a subset of 23 complexes from the database (complexes A to F; see **Table 1** in the main article) and a subset of 27 DFT functionals (1 local functional, 5 additional functionals per category for GGA, HGGA, MGGA and HMGGGA, 6 RS-HGGA functionals, and HF; see (**Table S1**)) in order to save computational cost for the full optimization of complexes. We chose these functionals based on popularity among computational chemists and also based on the use in our research group, which is admittedly arbitrary. To minimize expense, double hybrid functionals and MP2 methods are excluded at this stage. Note that reactants and products of the dissociation all underwent geometry optimization with each evaluated method. The mean signed error (MSE), mean unsigned error (MUE), root mean square deviation (RMSD) and maximum absolute deviation (MAXD) for each method was then evaluated with respect to the experimental bond dissociation energies.
- (ii) A reference functional was then selected. We chose the ‘best performing functional’ from step (i) as reference functional. Single point energy calculations were then performed on the reference functional’s optimized geometries using all other functionals/methods listed in **Table S1**. (Using “double-slash” notation, this is a “Reference functional/def2-TZVPP//Tested Functional/def2-TZVPP” calculation.) We then added the reference functional’s thermal/vibrational correction to the tested functional’s SCF energy, and used these thermally corrected values to calculate the new BDE. (Note that this has a long precedence; for example, the vibrational corrections from another functional and frozen geometries are used in the G3/99 test bed of enthalpies of formation.)<sup>5</sup> Validation of this method is shown in the results below.
- (iii) Step (ii) was then repeated for all the functionals and methods listed in **Table 1** all the 30 complexes in the full database. The intrinsic assumption is that step (ii) demonstrated that frozen geometries from one method could be used to test the efficacy of other methods,

and thus we can avoid geometry optimizations with some methods. (This is critical for large scale testing of double hybrids.)

**Table S1:** DFT functionals and *ab initio* methods used in the evaluation of bond dissociation energies (BDEs). Note that we performed full optimization on the subset of 23 complexes chosen.

| <b>DFT Functionals/<i>ab initio</i> methods</b> |                                                                                   |
|-------------------------------------------------|-----------------------------------------------------------------------------------|
| <b>LSDA</b>                                     | SVWN                                                                              |
| <b>GGA</b>                                      | B97D, BLYP, MPWPW91, PBEPBE, PW91PW91,                                            |
| <b>HGGA</b>                                     | APF, APFD, B3LYP, BHandHLYP, PBE1PBE                                              |
| <b>MGGA</b>                                     | BB95, M06-L, MPWB95, THCTH, TPSSTPSS                                              |
| <b>HMGGA</b>                                    | BMK, M06, M06-2X, M06-HF, TPSSH                                                   |
| <b>RS-HGGA</b>                                  | HSE2PBE, HSEH1PBE, LC- $\omega$ PBE, $\omega$ B97, $\omega$ B97X, $\omega$ B97XD, |
| <b><i>Ab initio</i> methods</b>                 | HF                                                                                |

**(i) Bond Dissociation Enthalpies (BDEs) while optimizing geometries**

We computed the BDEs of 23 complexes (subset of database) using the 27 functionals (subset of functionals) listed in **Table S1**. The mean signed error (MSE), mean unsigned error (MUE), root-mean square deviation (RMSD) and maximum absolute deviation (MAXD) of BDEs with respect to experimental values for various functionals and methods are given in **Table S2**. The computed bond dissociation enthalpies (BDEs) along with the experimental values for the 23 complexes are given in **Table S5**. Note that all these values are based on fully optimized results.

**Table S2:** The mean signed error (MSE), mean unsigned error (MUE), root-mean square deviation (RMSD) and maximum absolute deviation (MAXD) for 27 DFT functionals and HF method.

|             | MSE   | MUE  | RMSD | MAXD |
|-------------|-------|------|------|------|
| <b>LSDA</b> |       |      |      |      |
| SVWN        | 18.3  | 18.3 | 18.9 | 26.0 |
| <b>GGA</b>  |       |      |      |      |
| B97D        | 2.6   | 2.9  | 3.5  | 7.7  |
| BLYP        | -8.6  | 8.6  | 9.0  | 14.9 |
| MPWPW91     | -2.5  | 2.9  | 3.4  | 6.8  |
| PBEPBE      | 0.0   | 2.1  | 2.5  | 4.8  |
| PW91PW91    | 0.6   | 2.0  | 2.5  | 5.4  |
| <b>HGGA</b> |       |      |      |      |
| APF         | -4.2  | 4.3  | 4.8  | 8.5  |
| APFD        | 11.9  | 11.9 | 12.3 | 17.2 |
| B3LYP       | -8.9  | 8.9  | 9.4  | 16.1 |
| BHandHLYP   | -11.4 | 11.4 | 12.3 | 21.9 |
| PBE1PBE     | -2.7  | 2.9  | 3.5  | 6.8  |
| <b>MGGA</b> |       |      |      |      |
| BB95        | -2.0  | 2.6  | 3.1  | 6.6  |
| M06-L       | -0.4  | 1.9  | 2.2  | 4.4  |
| MPWB95      | 0.7   | 2.2  | 2.7  | 4.6  |
| THCTH       | -8.1  | 8.1  | 8.5  | 13.6 |
| TPSSTPSS    | -2.1  | 2.6  | 3.1  | 5.9  |

| <b>HMGGA</b>     |       |      |      |      |
|------------------|-------|------|------|------|
| BMK              | -5.6  | 5.6  | 6.3  | 11.1 |
| MO6              | 0.3   | 1.8  | 2.0  | 3.4  |
| MO6-2X           | -2.6  | 3.7  | 4.9  | 10.6 |
| MO6-HF           | -0.7  | 4.4  | 5.2  | 10.0 |
| TPSSH            | -3.2  | 3.3  | 3.9  | 6.8  |
| <b>RGGA</b>      |       |      |      |      |
| HSE2PBE          | -2.8  | 3.0  | 3.6  | 7.2  |
| HSEH1PBE         | -2.7  | 2.9  | 3.4  | 7.0  |
| LC- $\omega$ PBE | -3.0  | 3.1  | 3.7  | 6.4  |
| $\omega$ B97     | -2.5  | 3.0  | 3.8  | 8.1  |
| $\omega$ B97X    | -3.5  | 3.8  | 4.5  | 9.7  |
| $\omega$ B97XD   | -0.2  | 2.0  | 2.6  | 6.3  |
| <b>Ab initio</b> |       |      |      |      |
| HF               | -18.3 | 18.3 | 19.4 | 32.8 |

To get an overall picture of the performance of the functionals a graphical representation of MUE and RMSD is shown in **Figure S1**.

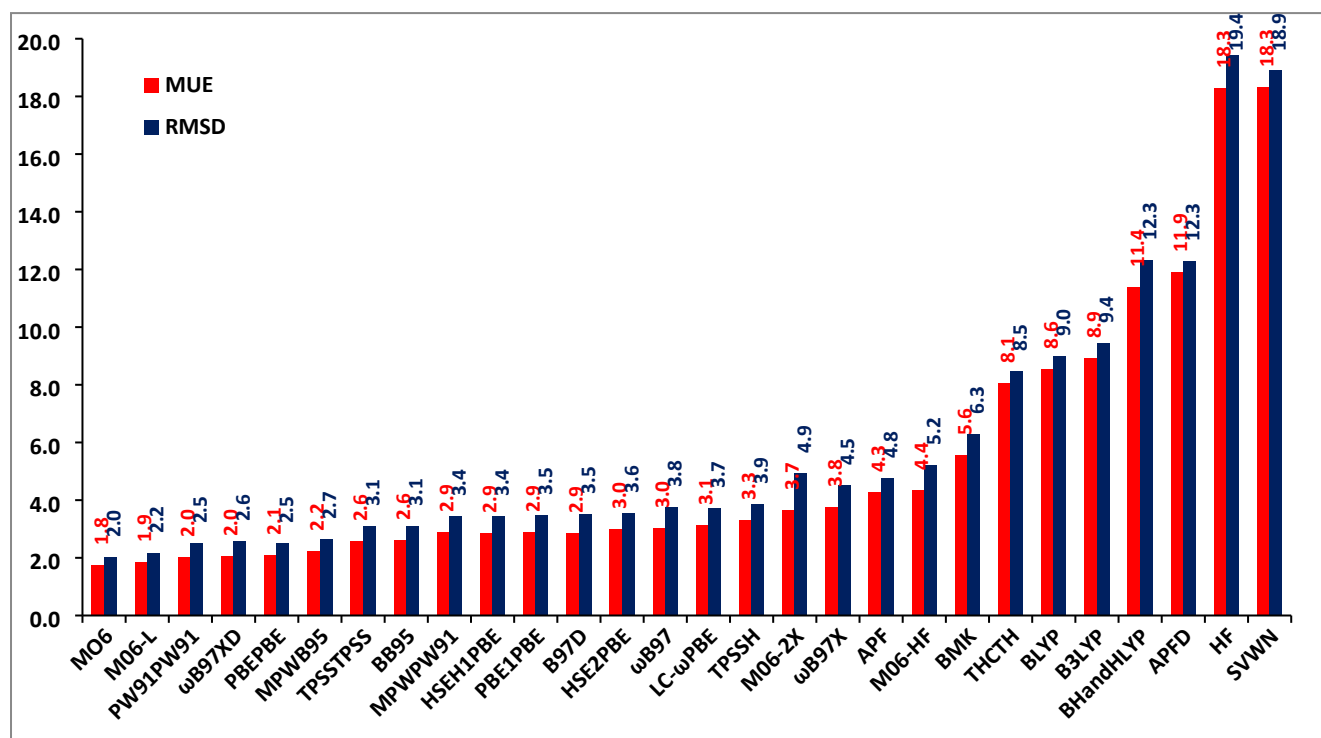

**Figure S1:** MUE and RMSD (kcal/mol) of BDEs for different functionals/methods (**Table S1**) in the ascending order of MUE values. The statistical parameters are based on BDEs calculated for 23 complexes after full optimization.

*We found MO6 is the best performing functional here and hence, chose this functional as the 'reference functional' for further calculations, i.e. we used MO6 geometries.*

(ii) **BDEs from Frozen M06 geometries :**

We then took the M06 optimized geometries as the reference structure and evaluated the approximate BDEs ( ${}_{\text{Frozen}}\text{BDE}^{\text{M06}}$ ). The approximate BDEs utilize the SCF energy calculated with the evaluated functional plus the thermal correction obtained at the M06 level. (See **Table S6** for values) We then compared the  ${}_{\text{Frozen}}\text{BDE}^{\text{M06}}$  with the optimized results for the same functionals. The MSE, MUE, RMSD and MAXD of  ${}_{\text{Frozen}}\text{BDE}^{\text{M06}}$  are shown in **Table S3** along with the deviation from the optimized BDE results.

**Table S3:** The MSE, MUE, RMSD and MAXD values (kcal/mol) of  ${}_{\text{Frozen}}\text{BDE}^{\text{M06}}$  values using M06 reference geometries and the deviation from the BDE (fully optimized) values.

|           |                  | Frozen BDE <sup>M06</sup> |      |      |      | Deviation (Frozen BDE <sup>M06</sup> – BDE) |      |      |      |
|-----------|------------------|---------------------------|------|------|------|---------------------------------------------|------|------|------|
|           |                  | MSE                       | MUE  | RMSD | MAXD | MSE                                         | MUE  | RMSD | MAXD |
| LSDA      | SVWN             | 16.9                      | 16.9 | 17.6 | 25.9 | -1.4                                        | -1.4 | -1.3 | -0.1 |
| GGA       | B97D             | 2.7                       | 3.0  | 3.7  | 8.1  | 0.2                                         | 0.2  | 0.2  | 0.4  |
|           | BLYP             | -9.8                      | 9.8  | 10.3 | 16.4 | -1.3                                        | 1.3  | 1.3  | 1.4  |
|           | MPWPW91          | -2.8                      | 3.0  | 3.6  | 7.2  | -0.3                                        | 0.1  | 0.2  | 0.4  |
|           | PBEPBE           | -0.2                      | 2.0  | 2.5  | 5.1  | -0.2                                        | -0.1 | 0.0  | 0.2  |
|           | PW91PW91         | 0.4                       | 2.0  | 2.4  | 4.3  | -0.2                                        | -0.1 | -0.1 | -1.1 |
| HGGA      | APF              | -4.4                      | 4.4  | 4.9  | 8.6  | -0.2                                        | 0.1  | 0.1  | 0.1  |
|           | APFD             | 11.6                      | 11.6 | 12.0 | 17.3 | -0.3                                        | -0.3 | -0.3 | 0.1  |
|           | B3LYP            | -9.7                      | 9.7  | 10.3 | 16.9 | -0.8                                        | 0.8  | 0.8  | 0.8  |
|           | BHandHLYP        | -12.7                     | 12.7 | 13.8 | 23.1 | -1.3                                        | 1.3  | 1.4  | 1.2  |
|           | PBE1PBE          | -2.9                      | 2.9  | 3.6  | 6.9  | -0.2                                        | 0.0  | 0.1  | 0.1  |
| MGGA      | BB95             | -2.1                      | 2.7  | 3.2  | 6.6  | -0.2                                        | 0.1  | 0.1  | 0.0  |
|           | M06-L            | -0.6                      | 1.9  | 2.2  | 4.5  | -0.2                                        | 0.0  | 0.0  | 0.2  |
|           | MPWB95           | 0.6                       | 2.2  | 2.6  | 4.6  | -0.1                                        | -0.1 | -0.1 | 0.0  |
|           | THCTH            | -8.9                      | 8.9  | 9.2  | 13.9 | -0.8                                        | 0.8  | 0.8  | 0.2  |
|           | TPSSTPSS         | -2.3                      | 2.6  | 3.2  | 6.1  | -0.2                                        | 0.1  | 0.1  | 0.2  |
| HMGGA     | BMK              | -5.5                      | 5.5  | 6.2  | 10.8 | 0.1                                         | -0.1 | -0.1 | -0.4 |
|           | M06              | 0.3                       | 1.8  | 2.0  | 3.4  | 0.0                                         | 0.0  | 0.0  | 0.0  |
|           | M06-2X           | -3.1                      | 4.1  | 5.4  | 11.1 | -0.5                                        | 0.4  | 0.4  | 0.6  |
|           | M06-HF           | -1.1                      | 4.4  | 5.5  | 10.7 | -0.3                                        | 0.0  | 0.2  | 0.7  |
|           | TPSSH            | -3.3                      | 3.4  | 3.9  | 6.9  | -0.2                                        | 0.0  | 0.0  | 0.1  |
| RS-GGA    | HSE2PBE          | -3.0                      | 3.0  | 3.6  | 7.3  | -0.1                                        | 0.0  | 0.0  | 0.1  |
|           | HSEH1PBE         | -2.8                      | 2.9  | 3.5  | 7.1  | -0.2                                        | 0.0  | 0.1  | 0.1  |
|           | LC- $\omega$ PBE | -3.1                      | 3.2  | 3.8  | 7.0  | -0.1                                        | 0.1  | 0.1  | 0.5  |
|           | $\omega$ B97     | -2.6                      | 3.1  | 3.8  | 8.0  | -0.1                                        | 0.1  | 0.1  | -0.1 |
|           | $\omega$ B97X    | -3.7                      | 3.9  | 4.6  | 9.7  | -0.2                                        | 0.2  | 0.1  | 0.0  |
|           | $\omega$ B97XD   | -0.2                      | 2.0  | 2.5  | 6.4  | 0.0                                         | -0.1 | -0.1 | 0.2  |
| Ab initio | HF               | -28.2                     | 28.2 | 30.4 | 50.5 | -10.0                                       | 10.0 | 10.9 | 17.7 |

It is obvious that the deviation of the approximate BDEs calculated on M06 geometries is very small for almost all functionals; with the exception HF, which can be attributed to HF's overall poor performance. For many functionals, the difference between the  ${}_{\text{Frozen}}\text{BDE}^{\text{M06}}$  and BDEs by full optimization differs by a value as low as 0.0-0.2 kcal/mol. The functionals SVWN, BLYP, and BHandHLYP shows somewhat large deviation (close to 1.5 kcal/mol) followed by B3LYP and THCTH (0.8 kcal/mol). It can be concluded that our approach using M06 geometries and thermal corrections with the evaluated functionals SCF energy does not introduce significant error versus full optimization and vibrational analysis with the functional being tested.

Finally, to ensure this was not a fortuitous selection, we also evaluated the approximate BDEs ( ${}_{\text{Frozen}}\text{BDE}^{\omega\text{B97XD}}$ ) with  $\omega\text{B97XD}$  as the reference functional. The  ${}_{\text{Frozen}}\text{BDE}^{\omega\text{B97XD}}$  values are given in **Table S7**. The MSE, MUE, RMSD and MAXD values of  ${}_{\text{Frozen}}\text{BDE}^{\omega\text{B97XD}}$  and the deviation from the BDEs (fully optimized) are given in **Table S4**. This confirms that our “frozen geometry” approach is a valid one.

**Table S4:** The MSE, MUE, RMSD and MAXD values (kcal/mol) of  ${}_{\text{Frozen}}\text{BDE}^{\omega\text{B97XD}}$  values using  $\omega\text{B97XD}$  reference geometries and the deviation from the BDE (fully optimized) values.

|                  |                                  | ${}_{\text{Frozen}}\text{BDE}^{\omega\text{B97XD}}$ |      |      |      | Deviation ( ${}_{\text{Frozen}}\text{BDE}^{\omega\text{B97XD}} - \text{BDE}$ ) |      |      |      |
|------------------|----------------------------------|-----------------------------------------------------|------|------|------|--------------------------------------------------------------------------------|------|------|------|
|                  |                                  | MSE                                                 | MUE  | RMSD | MAXD | MSE                                                                            | MUE  | RMSD | MAXD |
| <b>LSDA</b>      | <b>SVWN</b>                      | 16.4                                                | 16.4 | 17.1 | 24.8 | -2.0                                                                           | -2.0 | -1.8 | -1.3 |
| <b>GGA</b>       | <b>B97D</b>                      | 2.5                                                 | 2.9  | 3.5  | 7.4  | -0.1                                                                           | 0.0  | 0.0  | -0.3 |
|                  | <b>BLYP</b>                      | -9.8                                                | 9.8  | 10.3 | 16.4 | -1.2                                                                           | 1.2  | 1.3  | 1.5  |
|                  | <b>MPWPW91</b>                   | -2.9                                                | 3.2  | 3.8  | 7.0  | -0.5                                                                           | 0.3  | 0.3  | 0.1  |
|                  | <b>PBEPBE</b>                    | -0.4                                                | 2.0  | 2.5  | 4.8  | -0.5                                                                           | -0.1 | 0.0  | -0.1 |
|                  | <b>PW91PW91</b>                  | 0.2                                                 | 1.9  | 2.4  | 4.9  | -0.5                                                                           | -0.1 | -0.1 | -0.4 |
| <b>HGGA</b>      | <b>APF</b>                       | -4.5                                                | 4.5  | 5.0  | 8.7  | -0.3                                                                           | 0.2  | 0.2  | 0.2  |
|                  | <b>APFD</b>                      | 11.4                                                | 11.4 | 11.8 | 17.1 | -0.5                                                                           | -0.5 | -0.5 | -0.1 |
|                  | <b>B3LYP</b>                     | -9.6                                                | 9.6  | 10.2 | 16.9 | -0.7                                                                           | 0.7  | 0.7  | 0.8  |
|                  | <b>BHandHLYP</b>                 | -12.4                                               | 12.4 | 13.5 | 23.1 | -1.0                                                                           | 1.0  | 1.2  | 1.2  |
|                  | <b>PBE1PBE</b>                   | -3.0                                                | 3.1  | 3.7  | 6.9  | -0.3                                                                           | 0.2  | 0.2  | 0.2  |
| <b>MGGA</b>      | <b>BB95</b>                      | -2.4                                                | 2.8  | 3.4  | 6.6  | -0.4                                                                           | 0.2  | 0.2  | 0.0  |
|                  | <b>M06-L</b>                     | -0.7                                                | 2.0  | 2.3  | 5.0  | -0.3                                                                           | 0.1  | 0.1  | 0.6  |
|                  | <b>MPWB95</b>                    | 0.3                                                 | 2.1  | 2.5  | 4.2  | -0.4                                                                           | -0.1 | -0.2 | -0.5 |
|                  | <b>THCTH</b>                     | -8.7                                                | 8.7  | 9.1  | 14.2 | -0.6                                                                           | 0.6  | 0.6  | 0.5  |
|                  | <b>TPSSTPSS</b>                  | -2.6                                                | 2.9  | 3.4  | 6.3  | -0.4                                                                           | 0.3  | 0.3  | 0.4  |
| <b>HMGGA</b>     | <b>BMK</b>                       | -5.5                                                | 5.5  | 6.3  | 11.0 | 0.0                                                                            | 0.0  | -0.1 | -0.2 |
|                  | <b>MO6</b>                       | 0.0                                                 | 1.8  | 2.0  | 3.8  | -0.3                                                                           | 0.0  | 0.0  | 0.4  |
|                  | <b>M06-2X</b>                    | -3.2                                                | 4.1  | 5.4  | 11.4 | -0.5                                                                           | 0.4  | 0.5  | 0.8  |
|                  | <b>M06-HF</b>                    | -1.2                                                | 4.5  | 5.5  | 10.8 | -0.4                                                                           | 0.1  | 0.3  | 0.8  |
|                  | <b>TPSSH</b>                     | -3.5                                                | 3.6  | 4.1  | 7.0  | -0.3                                                                           | 0.3  | 0.2  | 0.2  |
| <b>RS-GGA</b>    | <b>HSE2PBE</b>                   | -3.0                                                | 3.1  | 3.7  | 7.4  | -0.2                                                                           | 0.2  | 0.1  | 0.2  |
|                  | <b>HSEH1PBE</b>                  | -2.9                                                | 3.1  | 3.6  | 7.2  | -0.2                                                                           | 0.2  | 0.2  | 0.2  |
|                  | <b>LC-<math>\omega</math>PBE</b> | -3.2                                                | 3.3  | 3.9  | 6.7  | -0.2                                                                           | 0.2  | 0.2  | 0.3  |
|                  | <b><math>\omega</math>B97</b>    | -2.6                                                | 3.1  | 3.8  | 8.2  | -0.1                                                                           | 0.1  | 0.1  | 0.1  |
|                  | <b><math>\omega</math>B97X</b>   | -3.6                                                | 3.9  | 4.6  | 9.8  | -0.1                                                                           | 0.1  | 0.1  | 0.2  |
|                  | <b><math>\omega</math>B97XD</b>  | -0.2                                                | 2.0  | 2.6  | 6.2  | 0.0                                                                            | 0.0  | 0.0  | -0.1 |
| <b>Ab Initio</b> | <b>HF</b>                        | -27.4                                               | 27.4 | 29.6 | 48.8 | -9.1                                                                           | 9.1  | 10.1 | 16.0 |

(iii) **Final pass to accumulate values in main paper.**

We then used frozen BDE calculations for the complete list of 101 functionals and 2 ab initio methods listed in **Table 1** for all the 30 complexes in the database and the results are presented in the paper. It is to be noted that in the main paper, all the reported BDE values are computed at M06 optimized geometries. The computed BDEs are listed in **Table S8**.

(iv) **Solvent corrections**

Solvent effects were incorporated by using gas phase geometries and employing the SMD<sup>6</sup> solvation model for the twelve top performing functionals (those with MUEs below 2.5 kcal/mol) from gas-phase calculations. The list of solvents used in the experiments is listed in **Table S9**. The solvent corrected BDE values are given in **Table S10**.

## References

- (1) *Gaussian Development Version*, Revision H.08, M. J. Frisch, G. W. Trucks, H. B. Schlegel, G. E. Scuseria, M. A. Robb, J. R. Cheeseman, J. A. Montgomery, Jr., T. Vreven, G. Scalmani, B. Mennucci, V. Barone, G. A. Petersson, M. Caricato, H. Nakatsuji, M. Hada, M. Ehara, K. Toyota, R. Fukuda, J. Hasegawa, M. Ishida, T. Nakajima, Y. Honda, O. Kitao, H. Nakai, X. Li, H. P. Hratchian, J. E. Peralta, A. F. Izmaylov, K. N. Kudin, J. J. Heyd, E. Brothers, V. Staroverov, G. Zheng, R. Kobayashi, J. Normand, J. L. Sonnenberg, S. S. Iyengar, J. Tomasi, M. Cossi, N. Rega, J. C. Burant, J. M. Millam, M. Klene, J. E. Knox, J. B. Cross, V. Bakken, C. Adamo, J. Jaramillo, R. Gomperts, R. E. Stratmann, O. Yazyev, A. J. Austin, R. Cammi, C. Pomelli, J. W. Ochterski, P. Y. Ayala, K. Morokuma, G. A. Voth, P. Salvador, J. J. Dannenberg, V. G. Zakrzewski, S. Dapprich, A. D. Daniels, M. C. Strain, O. Farkas, D. K. Malick, A. D. Rabuck, K. Raghavachari, J. B. Foresman, J. V. Ortiz, Q. Cui, A. G. Baboul, S. Clifford, J. Cioslowski, B. B. Stefanov, G. Liu, A. Liashenko, P. Piskorz, I. Komaromi, R. L. Martin, D. J. Fox, T. Keith, M. A. Al-Laham, C. Y. Peng, A. Nanayakkara, M. Challacombe, W. Chen, M. W. Wong, and J. A. Pople, Gaussian, Inc., Wallingford CT, 2006.
- (2) Weigend, F.; Ahlrichs, R. *Phys. Chem. Chem. Phys.* **2005**, *7*, 3297.
- (3) Wheeler, S. E.; Houk, K. N. *J. Chem. Theory Comput.* **2010**, *6*, 395.
- (4) Johnson, E. R.; Becke, A. D.; Sherrill, C. D.; DiLabio, G. A. *J. Chem. Phys.* **2009**, *131*, 034111.
- (5) Curtiss, L. a.; Raghavachari, K.; Redfern, P. C.; Pople, J. a. *J. Chem. Phys.* **2000**, *112*, 7374.
- (6) Marenich, A. V; Cramer, C. J.; Truhlar, D. G. *J. Phys. Chem. B* **2009**, *113*, 6378.



**Table S5:** The calculated BDEs for 23 complexes in the subset of complexes from the database using functionals listed in **Table S1**

| Complex                                               | Ligand L                         | Expt       | LSDA | GGA  |      |             |            |              | HGGA |      |       |             |             | MGGA |       |            |       |              |
|-------------------------------------------------------|----------------------------------|------------|------|------|------|-------------|------------|--------------|------|------|-------|-------------|-------------|------|-------|------------|-------|--------------|
|                                                       |                                  |            | SVWN | B97D | BLYP | MPW<br>PW91 | PBE<br>PBE | PW91<br>PW91 | APF  | APFD | B3LYP | BH&<br>HLYP | PBE1<br>PBE | BB95 | M06-L | MPW<br>B95 | tHCTH | TPSS<br>TPSS |
| CpMn(CO) <sub>2</sub> L                               | η <sup>2</sup> -2,3-dihydrofuran | 28.4 ± 1.0 | 53.8 | 33.6 | 20.0 | 28.7        | 31.7       | 32.2         | 25.6 | 41.1 | 18.3  | 12.5        | 27.3        | 29.7 | 29.7  | 32.6       | 21.2  | 28.9         |
|                                                       | chloropropane                    | 16.0 ± 0.6 | 32.4 | 17.6 | 13.1 | 16.9        | 18.7       | 19.3         | 15.1 | 25.8 | 12.4  | 9.9         | 16.1        | 16.6 | 17.3  | 18.7       | 12.6  | 17.2         |
|                                                       | η <sup>2</sup> -cycloheptene     | 28.5 ± 0.8 | 50.9 | 31.7 | 16.2 | 25.1        | 28.2       | 28.7         | 22.2 | 40.6 | 14.9  | 9.6         | 23.9        | 26.4 | 27.2  | 29.6       | 17.2  | 25.6         |
|                                                       | η <sup>2</sup> -cyclooctene      | 34.9 ± 0.7 | 54.3 | 35.0 | 20.0 | 29.1        | 32.2       | 32.6         | 26.4 | 43.6 | 18.8  | 13.0        | 28.1        | 30.0 | 30.6  | 32.9       | 21.3  | 29.6         |
|                                                       | η <sup>2</sup> -furan            | 21.9 ± 1.0 | 41.5 | 24.5 | 12.8 | 20.3        | 22.8       | 23.3         | 17.6 | 32.6 | 11.6  | 8.1         | 19.0        | 20.5 | 20.7  | 23.1       | 13.7  | 20.7         |
|                                                       | S( <i>n</i> -Bu) <sub>2</sub>    | 36.0 ± 1.0 | 53.6 | 36.6 | 26.2 | 32.8        | 35.3       | 35.9         | 30.2 | 44.9 | 25.0  | 20.2        | 31.5        | 32.4 | 32.8  | 35.1       | 26.8  | 32.6         |
|                                                       | tetrahydrothiophene              | 37.0       | 53.8 | 35.8 | 26.9 | 33.5        | 36.3       | 36.9         | 31.1 | 44.6 | 25.4  | 20.0        | 32.3        | 33.3 | 32.6  | 35.7       | 29.1  | 33.5         |
|                                                       | THF                              | 24.0 ± 3.0 | 35.0 | 23.4 | 16.0 | 18.2        | 20.1       | 21.0         | 17.8 | 31.0 | 16.6  | 16.0        | 18.9        | 18.1 | 22.5  | 19.9       | 14.1  | 19.3         |
|                                                       | thiophene                        | 19.5       | 39.8 | 22.9 | 16.6 | 22.4        | 24.3       | 24.9         | 20.2 | 30.3 | 15.7  | 11.8        | 21.3        | 21.6 | 20.5  | 23.7       | 17.5  | 22.3         |
|                                                       | toluene                          | 14.2 ± 0.8 | 35.1 | 19.9 | 6.0  | 12.6        | 15.4       | 15.9         | 10.2 | 28.9 | 5.5   | 3.4         | 11.7        | 13.4 | 15.2  | 16.3       | 6.4   | 13.0         |
|                                                       | TES                              | 27.4 ± 0.8 | 53.4 | 31.5 | 16.5 | 26.4        | 30.0       | 30.3         | 23.1 | 42.6 | 15.5  | 11.2        | 25.0        | 28.1 | 26.5  | 31.4       | 18.4  | 24.9         |
| BzCr(CO) <sub>2</sub> L                               | η <sup>2</sup> -2,3-dihydrofuran | 21.0 ± 1.0 | 44.9 | 26.3 | 12.8 | 20.6        | 23.5       | 24.1         | 18.7 | 34.5 | 12.2  | 9.7         | 20.5        | 22.1 | 23.5  | 25.1       | 13.3  | 21.1         |
|                                                       | η <sup>2</sup> -3-hexyne         | 22.8 ± 0.4 | 46.0 | 27.2 | 13.4 | 21.4        | 24.4       | 25.1         | 19.3 | 40.0 | 12.7  | 9.7         | 21.1        | 21.9 | 23.2  | 25.2       | 16.0  | 21.8         |
|                                                       | η <sup>2</sup> -benzene          | 11.5 ± 0.9 | 25.9 | 13.3 | 1.0  | 6.5         | 8.3        | 9.0          | 4.8  | 22.7 | 1.4   | 1.5         | 6.3         | 7.3  | 10.8  | 10.1       | 1.3   | 6.7          |
|                                                       | TES                              | 24.3 ± 1.2 | 45.4 | 25.1 | 11.6 | 19.2        | 22.8       | 23.1         | 17.7 | 38.7 | 11.5  | 9.6         | 19.8        | 21.3 | 21.8  | 24.7       | 12.2  | 18.5         |
| Cr(CO) <sub>3</sub> L                                 | THF                              | 21.4 ± 0.8 | 31.0 | 20.2 | 12.4 | 14.6        | 16.6       | 17.4         | 13.9 | 28.2 | 12.6  | 12.0        | 15.1        | 14.8 | 19.5  | 17.5       | 10.7  | 15.5         |
|                                                       | η <sup>2</sup> -benzene          | 11.4 ± 1.1 | 26.0 | 14.6 | 3.5  | 8.0         | 10.3       | 10.9         | 8.1  | 23.7 | 4.5   | 4.6         | 9.6         | 9.3  | 13.4  | 11.9       | 4.2   | 9.2          |
|                                                       | η <sup>2</sup> -3-hexyne         | 18.3 ± 0.7 | 39.6 | 20.6 | 8.7  | 16.6        | 19.5       | 20.1         | 16.3 | 31.6 | 9.7   | 8.4         | 18.3        | 17.6 | 20.2  | 20.8       | 9.8   | 17.8         |
| CpRe(CO) <sub>2</sub> L<br>(DMP)Mn(CO) <sub>2</sub> L | heptane                          | 13.7 ± 0.2 | 26.6 | 15.5 | 7.0  | 11.4        | 12.9       | 13.4         | 12.2 | 27.7 | 8.6   | 9.1         | 13.3        | 10.4 | 11.9  | 12.3       | 8.1   | 11.7         |
|                                                       | THF                              | 22.1 ± 0.5 | 35.6 | 23.9 | 16.3 | 18.6        | 20.6       | 21.4         | 17.7 | 31.0 | 17.0  | 16.2        | 18.8        | 19.0 | 22.2  | 21.6       | 14.3  | 19.6         |
| TpRe(CO) <sub>2</sub> L                               | η <sup>2</sup> -benzene          | 14.9 ± 1.4 | 38.9 | 22.6 | 8.7  | 15.7        | 18.5       | 18.9         | 12.0 | 30.6 | 7.2   | 4.9         | 13.4        | 16.8 | 17.6  | 19.5       | 9.8   | 15.6         |
|                                                       | bromohexane                      | 21.1 ± 0.4 | 35.4 | 20.6 | 14.7 | 19.5        | 21.4       | 21.9         | 16.6 | 32.9 | 13.1  | 10.0        | 17.6        | 19.3 | 18.9  | 21.4       | 15.0  | 19.5         |
|                                                       | THF                              | 23.9 ± 0.9 | 36.9 | 30.4 | 16.9 | 19.5        | 21.6       | 22.5         | 20.8 | 40.9 | 19.2  | 20.8        | 22.3        | 19.4 | 26.8  | 22.2       | 16.0  | 21.4         |
|                                                       |                                  | MSE        | 18.3 | 2.6  | -8.6 | -2.5        | 0.0        | 0.6          | -4.2 | 11.9 | -8.9  | -11.4       | -2.7        | -2.0 | -0.4  | 0.7        | -8.1  | -2.1         |
|                                                       |                                  | MUE        | 18.3 | 2.9  | 8.6  | 2.9         | 2.1        | 2.0          | 4.3  | 11.9 | 8.9   | 11.4        | 2.9         | 2.6  | 1.9   | 2.2        | 8.1   | 2.6          |
|                                                       |                                  | RMSD       | 18.9 | 3.5  | 9.0  | 3.4         | 2.5        | 2.5          | 4.8  | 12.3 | 9.4   | 12.3        | 3.5         | 3.1  | 2.2   | 2.7        | 8.5   | 3.1          |
|                                                       |                                  | MAXD       | 26.0 | 7.7  | 14.9 | 6.8         | 4.8        | 5.4          | 8.5  | 17.2 | 16.1  | 21.9        | 6.8         | 6.6  | 4.4   | 4.6        | 13.6  | 5.9          |

| Complex                    | Ligand L                      | Expt       | HMGGA      |        |        |      |       | RGGGA   |          |                  |              |               |                | Ab Initio |
|----------------------------|-------------------------------|------------|------------|--------|--------|------|-------|---------|----------|------------------|--------------|---------------|----------------|-----------|
|                            |                               |            | BMK        | M06-2X | M06-HF | M06  | TPSSh | HSE2PBE | HSHE1PBE | LC- $\omega$ PBE | $\omega$ B97 | $\omega$ B97X | $\omega$ B97XD | HF        |
| CpMn(CO) <sub>2</sub> L    | $\eta^2$ -2,3-dihydrofuran    | 28.4 ± 1.0 | 22.4       | 23.0   | 22.8   | 30.9 | 27.2  | 26.8    | 27.0     | 27.5             | 25.7         | 24.2          | 27.9           | 1.9       |
|                            | chloropropane                 | 16.0 ± 0.6 | 12.9       | 16.2   | 16.9   | 17.8 | 16.2  | 16.3    | 16.3     | 15.2             | 16.2         | 15.6          | 16.5           | 3.1       |
|                            | $\eta^2$ -cycloheptene        | 28.5 ± 0.8 | 19.5       | 21.2   | 21.6   | 27.7 | 24.0  | 23.5    | 23.7     | 24.1             | 22.8         | 21.3          | 26.2           | 1.2       |
|                            | $\eta^2$ -cyclooctene         | 34.9 ± 0.7 | 23.8       | 24.3   | 24.9   | 31.8 | 28.1  | 27.7    | 27.9     | 28.6             | 26.8         | 25.2          | 29.9           | 2.1       |
|                            | $\eta^2$ -furan               | 21.9 ± 1.0 | 15.0       | 17.0   | 18.9   | 22.1 | 19.2  | 18.8    | 18.9     | 18.9             | 17.4         | 16.4          | 19.7           | 1.7       |
|                            | S( <i>n</i> -Bu) <sub>2</sub> | 36.0 ± 1.0 | 26.1       | 27.6   | 27.7   | 34.1 | 31.2  | 31.5    | 31.6     | 31.1             | 30.6         | 29.7          | 33.1           | 7.9       |
|                            | tetrahydrothiophene           | 37.0       | 26.4       | 26.8   | 29.0   | 33.9 | 31.5  | 31.7    | 32.3     | 31.2             | 30.8         | 30.0          | 31.9           | 9.6       |
|                            | THF                           | 24.0 ± 3.0 | 18.8       | 23.3   | 25.6   | 22.5 | 18.8  | 19.5    | 19.4     | 19.1             | 22.0         | 21.1          | 23.0           | 9.1       |
|                            | thiophene                     | 19.5       | 16.2       | 17.2   | 18.4   | 22.1 | 21.2  | 21.3    | 21.3     | 20.7             | 19.9         | 19.3          | 21.0           | 3.0       |
|                            | toluene                       | 14.2 ± 0.8 | 8.4        | 14.1   | 15.9   | 15.8 | 11.7  | 11.7    | 11.8     | 10.5             | 11.8         | 10.5          | 15.0           | 0.3       |
| BzCr(CO) <sub>2</sub> L    | TES                           | 27.4 ± 0.8 | 18.4       | 19.5   | 19.2   | 27.6 | 23.4  | 24.4    | 24.7     | 25.9             | 25.1         | 22.8          | 27.5           | 2.3       |
|                            | $\eta^2$ -2,3-dihydrofuran    | 21.0 ± 1.0 | 17.8       | 20.5   | 21.7   | 24.3 | 19.9  | 20.1    | 20.3     | 19.1             | 17.8         | 17.3          | 21.7           | 1.0       |
|                            | $\eta^2$ -3-hexyne            | 22.8 ± 0.4 | 19.0       | 21.5   | 25.3   | 24.1 | 20.5  | 20.7    | 20.9     | 20.5             | 18.9         | 18.5          | 24.1           | 8.0       |
|                            | $\eta^2$ -benzene             | 11.5 ± 0.9 | 5.5        | 10.6   | 13.6   | 10.4 | 5.9   | 6.4     | 6.5      | 5.1              | 8.2          | 7.1           | 10.3           | -0.1      |
|                            | TES                           | 24.3 ± 1.2 | 16.2       | 18.6   | 20.5   | 23.0 | 17.6  | 19.2    | 19.6     | 19.4             | 19.0         | 17.9          | 23.3           | 1.8       |
| Cr(CO) <sub>5</sub> L      | THF                           | 21.4 ± 0.8 | 15.1       | 19.9   | 21.9   | 18.9 | 14.9  | 15.6    | 15.5     | 15.2             | 17.9         | 17.7          | 19.6           | 7.3       |
|                            | $\eta^2$ -benzene             | 11.4 ± 1.1 | 9.3        | 14.1   | 17.4   | 13.1 | 8.9   | 9.6     | 9.8      | 9.4              | 11.9         | 10.7          | 13.3           | 1.1       |
|                            | $\eta^2$ -3-hexyne            | 18.3 ± 0.7 | 17.8       | 20.4   | 25.1   | 20.8 | 17.2  | 17.9    | 18.1     | 17.9             | 18.2         | 17.3          | 20.5           | 1.2       |
| CpRe(CO) <sub>2</sub> L    | heptane                       | 13.7 ± 0.2 | 10.9       | 13.8   | 18.2   | 13.6 | 11.9  | 13.3    | 13.3     | 13.9             | 14.2         | 13.7          | 16.4           | 3.0       |
|                            | (DMP)Mn(CO) <sub>2</sub> L    | THF        | 22.1 ± 0.5 | 18.7   | 23.6   | 25.7 | 22.2  | 18.9    | 19.4     | 19.3             | 19.0         | 22.1          | 21.1           | 23.3      |
| (DMP)Mn(CO) <sub>2</sub> L | $\eta^2$ -benzene             | 14.9 ± 1.4 | 10.4       | 14.9   | 17.3   | 17.3 | 13.8  | 13.4    | 13.5     | 12.9             | 14.1         | 12.6          | 16.4           | 1.3       |
|                            | bromohexane                   | 21.1 ± 0.4 | 14.2       | 16.5   | 17.2   | 19.8 | 18.0  | 17.7    | 17.7     | 16.8             | 17.0         | 16.4          | 17.9           | 3.2       |
| TpRe(CO) <sub>2</sub> L    | THF                           | 23.9 ± 0.9 | 23.3       | 29.2   | 32.2   | 27.3 | 21.6  | 22.9    | 22.8     | 23.4             | 28.4         | 26.8          | 30.2           | 13.8      |
|                            |                               | MSE        | -5.6       | -2.6   | -0.7   | 0.3  | -3.2  | -2.8    | -2.7     | -3.0             | -2.5         | -3.5          | -0.2           | -18.3     |
|                            |                               | MUE        | 5.6        | 3.7    | 4.4    | 1.8  | 3.3   | 3.0     | 2.9      | 3.1              | 3.0          | 3.8           | 2.0            | 18.3      |
|                            |                               | RMSD       | 6.3        | 4.9    | 5.2    | 2.0  | 3.9   | 3.6     | 3.4      | 3.7              | 3.8          | 4.5           | 2.6            | 19.4      |
|                            |                               | MAXD       | 11.1       | 10.6   | 10.0   | 3.4  | 6.8   | 7.2     | 7.0      | 6.4              | 8.1          | 9.7           | 6.3            | 32.8      |

**Table S6:** Approximate BDEs ( $_{\text{frozen}}\text{BDE}^{\text{M06}}$ ) calculated on M06 geometries using DFT functionals/methods listed in **Table S1** for the subset of complexes.

| Complex                 | Ligand L                         | Expt.      | LSDA       | GGA  |      |             |            |              | HGGA |      |       |             |             | MGGA |       |            |       |      |
|-------------------------|----------------------------------|------------|------------|------|------|-------------|------------|--------------|------|------|-------|-------------|-------------|------|-------|------------|-------|------|
|                         |                                  |            | SVWN       | B97D | BLYP | MPW<br>PW91 | PBE<br>PBE | PW91<br>PW91 | APF  | APFD | B3LYP | BH&<br>HLYP | PBE1<br>PBE | BB95 | M06-L | MPW<br>B95 | tHCTH | TPSS |
| CpMn(CO) <sub>2</sub> L | η <sup>2</sup> -2,3-dihydrofuran | 28.4 ± 1.0 | 53.4       | 33.8 | 18.5 | 28.7        | 31.8       | 32.2         | 25.6 | 40.9 | 17.6  | 11.1        | 27.2        | 29.7 | 29.6  | 32.7       | 20.9  | 28.9 |
|                         | chloropropane                    | 16.0 ± 0.6 | 31.4       | 17.7 | 12.3 | 16.7        | 18.5       | 19.1         | 14.9 | 25.9 | 12.0  | 9.6         | 16.0        | 16.5 | 17.2  | 18.7       | 12.2  | 17.0 |
|                         | η <sup>2</sup> -cycloheptene     | 28.5 ± 0.8 | 50.3       | 32.0 | 14.8 | 25.0        | 28.3       | 28.7         | 22.1 | 40.5 | 14.1  | 7.9         | 23.9        | 26.5 | 26.9  | 29.6       | 16.9  | 25.6 |
|                         | η <sup>2</sup> -cyclooctene      | 34.9 ± 0.7 | 54.0       | 35.3 | 18.5 | 29.0        | 32.2       | 32.6         | 26.3 | 43.7 | 18.0  | 11.8        | 28.0        | 30.1 | 30.4  | 33.0       | 21.0  | 29.5 |
|                         | η <sup>2</sup> -furan            | 21.9 ± 1.0 | 41.0       | 24.6 | 11.6 | 20.1        | 22.8       | 23.2         | 17.6 | 32.4 | 10.9  | 6.0         | 19.0        | 20.6 | 20.5  | 23.2       | 13.4  | 20.6 |
|                         | S( <i>n</i> -Bu) <sub>2</sub>    | 36.0 ± 1.0 | 53.0       | 36.7 | 25.2 | 32.8        | 35.3       | 35.9         | 30.0 | 44.9 | 24.5  | 19.8        | 31.4        | 32.5 | 32.8  | 35.2       | 26.6  | 32.5 |
|                         | tetrahydrothiophene              | 37.0       | 53.5       | 35.9 | 26.7 | 34.1        | 36.4       | 36.9         | 31.0 | 43.0 | 25.6  | 20.4        | 32.2        | 33.4 | 32.7  | 35.9       | 28.3  | 33.5 |
|                         | THF                              | 24.0 ± 3.0 | 33.5       | 23.0 | 14.7 | 17.5        | 19.5       | 20.3         | 17.5 | 31.2 | 15.9  | 15.8        | 18.7        | 17.4 | 22.1  | 19.9       | 13.1  | 18.7 |
|                         | thiophene                        | 19.5       | 37.7       | 22.9 | 14.9 | 21.0        | 23.0       | 23.6         | 18.9 | 30.3 | 14.5  | 11.1        | 20.1        | 20.2 | 20.2  | 22.5       | 15.9  | 21.0 |
|                         | toluene                          | 14.2 ± 0.8 | 32.0       | 19.5 | 4.0  | 11.6        | 14.4       | 14.9         | 9.4  | 29.0 | 3.7   | 0.3         | 10.9        | 12.6 | 14.8  | 15.5       | 5.0   | 12.1 |
|                         | TES                              | 27.4 ± 0.8 | 53.3       | 32.1 | 14.9 | 26.8        | 30.5       | 30.7         | 23.5 | 42.9 | 13.9  | 5.8         | 25.4        | 28.5 | 26.4  | 31.7       | 18.1  | 25.4 |
| BzCr(CO) <sub>2</sub> L | η <sup>2</sup> -2,3-dihydrofuran | 21.0 ± 1.0 | 43.7       | 26.6 | 11.3 | 20.4        | 23.5       | 24.0         | 18.7 | 34.5 | 11.4  | 8.5         | 20.5        | 22.0 | 23.1  | 25.1       | 12.5  | 21.0 |
|                         | η <sup>2</sup> -3-hexyne         | 22.8 ± 0.4 | 43.7       | 27.2 | 11.6 | 20.6        | 23.8       | 24.4         | 18.9 | 40.1 | 11.7  | 9.0         | 20.9        | 21.7 | 23.0  | 25.0       | 13.4  | 21.3 |
|                         | η <sup>2</sup> -benzene          | 11.5 ± 0.9 | 21.6       | 13.6 | 0.0  | 5.5         | 7.9        | 8.5          | 4.8  | 22.5 | 0.6   | -0.1        | 6.2         | 6.9  | 10.6  | 9.5        | 0.4   | 6.4  |
|                         | TES                              | 24.3 ± 1.2 | 43.6       | 25.5 | 8.8  | 19.3        | 22.8       | 23.2         | 17.9 | 38.7 | 9.4   | 6.3         | 20.0        | 21.3 | 21.5  | 24.6       | 10.6  | 18.8 |
|                         | THF                              | 21.4 ± 0.8 | 30.0       | 20.5 | 11.2 | 14.2        | 16.3       | 17.1         | 13.5 | 28.1 | 11.8  | 11.2        | 14.8        | 14.8 | 19.4  | 17.5       | 9.6   | 15.3 |
| Cr(CO) <sub>5</sub> L   | η <sup>2</sup> -benzene          | 11.4 ± 1.1 | 23.3       | 14.8 | 2.5  | 8.0         | 10.3       | 10.9         | 8.1  | 23.6 | 3.9   | 3.9         | 9.6         | 9.3  | 13.3  | 11.9       | 3.3   | 9.1  |
|                         | η <sup>2</sup> -3-hexyne         | 18.3 ± 0.7 | 38.5       | 20.8 | 7.3  | 16.0        | 19.2       | 19.8         | 16.0 | 31.6 | 8.9   | 7.8         | 18.1        | 17.5 | 19.8  | 20.8       | 8.7   | 17.4 |
| CpRe(CO) <sub>2</sub> L | heptane                          | 13.7 ± 0.2 | 24.1       | 15.2 | 5.8  | 10.6        | 12.2       | 12.8         | 11.6 | 25.9 | 7.9   | 8.7         | 12.8        | 10.0 | 11.7  | 11.9       | 7.2   | 11.1 |
|                         | (DMP)Mn(CO) <sub>2</sub> L       | THF        | 22.1 ± 0.5 | 34.8 | 24.2 | 15.9        | 18.7       | 20.8         | 21.6 | 17.7 | 31.3  | 16.2        | 15.0        | 18.9 | 18.6  | 22.2       | 21.2  | 14.2 |
| TpRe(CO) <sub>2</sub> L | η <sup>2</sup> -benzene          | 14.9 ± 1.4 | 36.1       | 23.0 | 8.0  | 15.5        | 18.2       | 18.7         | 12.1 | 30.9 | 6.6   | 2.3         | 13.5        | 16.8 | 17.4  | 19.5       | 9.4   | 15.6 |
|                         | bromohexane                      | 21.1 ± 0.4 | 34.6       | 20.5 | 13.4 | 19.0        | 21.0       | 21.5         | 16.4 | 28.5 | 12.5  | 9.1         | 17.4        | 18.9 | 18.8  | 21.1       | 14.3  | 19.1 |
|                         | THF                              | 23.9 ± 0.9 | 36.0       | 30.9 | 16.3 | 19.3        | 21.5       | 22.5         | 20.7 | 40.6 | 18.8  | 20.6        | 22.2        | 19.5 | 26.8  | 22.3       | 15.6  | 21.2 |
|                         | MSE                              | 16.9       | 16.9       | 2.7  | -9.8 | -2.8        | -0.2       | 0.4          | -4.4 | 11.6 | -9.7  | -12.7       | -2.9        | -2.1 | -0.6  | 0.6        | -8.9  | -2.3 |
|                         | MUE                              | 16.9       | 16.9       | 3.0  | 9.8  | 3.0         | 2.0        | 2.0          | 4.4  | 11.6 | 9.7   | 12.7        | 2.9         | 2.7  | 1.9   | 2.2        | 8.9   | 2.6  |
|                         | RMSD                             | 17.6       | 17.6       | 3.7  | 10.3 | 3.6         | 2.5        | 2.4          | 4.9  | 12.0 | 10.3  | 13.8        | 3.6         | 3.2  | 2.2   | 2.6        | 9.2   | 3.2  |
|                         | MAXD                             | 25.9       | 25.9       | 8.1  | 16.4 | 7.2         | 5.1        | 4.3          | 8.6  | 17.3 | 16.9  | 23.1        | 6.9         | 6.6  | 4.5   | 4.6        | 13.9  | 6.1  |

| Complex                    | Ligand L                      | Expt.      | HMGGGA |        |        |      |       | RS-HGGA |          |                  |              |               | Ab Initio      |       |
|----------------------------|-------------------------------|------------|--------|--------|--------|------|-------|---------|----------|------------------|--------------|---------------|----------------|-------|
|                            |                               |            | BMK    | M06-2X | M06-HF | M06  | TPSSh | HSE2PBE | HSHE1PBE | LC- $\omega$ PBE | $\omega$ B97 | $\omega$ B97X | $\omega$ B97XD | HF    |
| CpMn(CO) <sub>2</sub> L    | $\eta^2$ -2,3-dihydrofuran    | 28.4 ± 1.0 | 22.9   | 22.3   | 22.0   | 30.9 | 27.2  | 26.8    | 27.0     | 27.4             | 25.7         | 24.1          | 28.0           | -13.6 |
|                            | chloropropane                 | 16.0 ± 0.6 | 13.5   | 15.8   | 17.2   | 17.8 | 16.1  | 16.2    | 16.2     | 15.1             | 16.0         | 15.5          | 16.6           | -1.6  |
|                            | $\eta^2$ -cycloheptene        | 28.5 ± 0.8 | 20.2   | 20.4   | 20.9   | 27.7 | 24.0  | 23.5    | 23.7     | 24.1             | 22.9         | 21.3          | 26.4           | -16.9 |
|                            | $\eta^2$ -cyclooctene         | 34.9 ± 0.7 | 24.1   | 23.8   | 24.2   | 31.8 | 28.0  | 27.6    | 27.8     | 28.5             | 26.9         | 25.2          | 30.1           | -13.0 |
|                            | $\eta^2$ -furan               | 21.9 ± 1.0 | 14.9   | 15.4   | 16.5   | 22.1 | 19.2  | 18.7    | 18.9     | 18.9             | 17.4         | 16.3          | 19.7           | -13.8 |
|                            | S( <i>n</i> -Bu) <sub>2</sub> | 36.0 ± 1.0 | 26.6   | 27.1   | 28.3   | 34.1 | 31.1  | 31.4    | 31.5     | 30.9             | 30.4         | 29.5          | 33.0           | 1.7   |
|                            | tetrahydrothiophene           | 37.0       | 27.1   | 26.5   | 27.2   | 33.9 | 32.0  | 32.2    | 32.3     | 31.6             | 30.8         | 30.0          | 32.6           | 2.1   |
|                            | THF                           | 24.0 ± 3.0 | 18.9   | 23.7   | 25.8   | 22.5 | 18.3  | 19.2    | 19.2     | 19.0             | 22.1         | 21.1          | 23.1           | 6.9   |
|                            | thiophene                     | 19.5       | 16.5   | 16.5   | 18.4   | 22.1 | 19.9  | 20.1    | 20.2     | 20.0             | 19.7         | 19.0          | 20.9           | -3.0  |
|                            | toluene                       | 14.2 ± 0.8 | 8.1    | 12.0   | 14.3   | 15.8 | 10.8  | 10.9    | 11.0     | 10.4             | 11.0         | 9.7           | 14.3           | -15.2 |
| BzCr(CO) <sub>2</sub> L    | TES                           | 27.4 ± 0.8 | 18.6   | 18.4   | 19.0   | 27.6 | 23.9  | 24.7    | 25.0     | 26.2             | 25.5         | 23.1          | 27.9           | -23.1 |
|                            | $\eta^2$ -2,3-dihydrofuran    | 21.0 ± 1.0 | 18.0   | 20.1   | 22.8   | 24.3 | 19.8  | 20.1    | 20.3     | 19.0             | 17.9         | 17.3          | 21.7           | -9.1  |
|                            | $\eta^2$ -3-hexyne            | 22.8 ± 0.4 | 19.0   | 21.3   | 26.2   | 24.1 | 20.2  | 20.5    | 20.6     | 19.3             | 18.9         | 18.5          | 24.2           | -8.2  |
|                            | $\eta^2$ -benzene             | 11.5 ± 0.9 | 4.9    | 10.3   | 13.3   | 10.4 | 5.7   | 6.3     | 6.4      | 5.1              | 7.3          | 6.3           | 10.2           | -9.8  |
|                            | TES                           | 24.3 ± 1.2 | 16.7   | 18.7   | 23.0   | 23.0 | 17.9  | 19.3    | 19.7     | 19.6             | 19.2         | 18.1          | 23.7           | -12.0 |
| Cr(CO) <sub>5</sub> L      | THF                           | 21.4 ± 0.8 | 14.8   | 20.1   | 21.5   | 18.9 | 14.7  | 15.2    | 15.2     | 14.4             | 17.8         | 16.8          | 19.0           | 2.3   |
|                            | $\eta^2$ -benzene             | 11.4 ± 1.1 | 8.7    | 14.0   | 17.4   | 13.1 | 8.8   | 9.7     | 9.8      | 9.3              | 11.6         | 10.5          | 13.3           | -4.8  |
| CpRe(CO) <sub>2</sub> L    | $\eta^2$ -3-hexyne            | 18.3 ± 0.7 | 17.9   | 20.4   | 25.4   | 20.8 | 16.9  | 17.7    | 17.9     | 17.7             | 18.3         | 17.4          | 20.7           | -7.4  |
|                            | heptane                       | 13.7 ± 0.2 | 10.8   | 13.7   | 17.6   | 13.6 | 11.3  | 12.8    | 12.8     | 13.6             | 14.2         | 13.6          | 16.3           | 1.7   |
| (DMP)Mn(CO) <sub>2</sub> L | THF                           | 22.1 ± 0.5 | 18.6   | 23.1   | 24.3   | 22.2 | 19.0  | 19.4    | 19.4     | 19.0             | 22.1         | 21.0          | 22.9           | 5.0   |
|                            | $\eta^2$ -benzene             | 14.9 ± 1.4 | 10.4   | 13.5   | 15.1   | 17.3 | 13.8  | 13.5    | 13.6     | 13.0             | 13.7         | 12.2          | 16.5           | -13.7 |
| TpRe(CO) <sub>2</sub> L    | bromohexane                   | 21.1 ± 0.4 | 13.9   | 15.7   | 16.8   | 19.8 | 17.7  | 17.5    | 17.6     | 16.7             | 16.7         | 16.1          | 17.9           | -3.2  |
|                            | THF                           | 23.9 ± 0.9 | 23.4   | 29.0   | 32.1   | 27.3 | 21.4  | 22.8    | 22.8     | 23.3             | 28.3         | 26.7          | 30.3           | 13.2  |
|                            |                               | MSE        | -5.5   | -3.1   | -1.1   | 0.3  | -3.3  | -3.0    | -2.8     | -3.1             | -2.6         | -3.7          | -0.2           | -28.2 |
|                            |                               | MUE        | 5.5    | 4.1    | 4.4    | 1.8  | 3.4   | 3.0     | 2.9      | 3.2              | 3.1          | 3.9           | 2.0            | 28.2  |
|                            |                               | RMSD       | 6.2    | 5.4    | 5.5    | 2.0  | 3.9   | 3.6     | 3.5      | 3.8              | 3.8          | 4.6           | 2.5            | 30.4  |
|                            |                               | MAXD       | 10.8   | 11.1   | 10.7   | 3.4  | 6.9   | 7.3     | 7.1      | 7.0              | 8.0          | 9.7           | 6.4            | 50.5  |

**Table S7:** Approximate BDEs ( $_{\text{Frozen}}\text{BDE}^{\omega\text{B97XD}}$ ) calculated on  $\omega\text{B97XD}$  geometries using DFT functionals/methods listed in **Table S1** for subset of complexes

| Complex                    | Ligand L                      | Expt       | LSDA | GGA  |      |             |            |              | HGGA |      |       |             | MGGA        |      |       |            |       |      |
|----------------------------|-------------------------------|------------|------|------|------|-------------|------------|--------------|------|------|-------|-------------|-------------|------|-------|------------|-------|------|
|                            |                               |            | SVWN | B97D | BLYP | MPW<br>PW91 | PBE<br>PBE | PW91<br>PW91 | APF  | APFD | B3LYP | BH&<br>HLYP | PBE1<br>PBE | BB95 | M06-L | MPW<br>B95 | tHCTH | TPSS |
| CpMn(CO) <sub>2</sub> L    | $\eta^2$ -2,3-dihydrofuran    | 28.4 ± 1.0 | 53.1 | 33.7 | 18.7 | 28.7        | 31.8       | 32.2         | 25.5 | 40.9 | 17.7  | 11.3        | 27.2        | 29.6 | 29.5  | 32.6       | 21.1  | 28.8 |
|                            | chloropropane                 | 16.0 ± 0.6 | 31.1 | 17.6 | 12.1 | 16.5        | 18.3       | 18.9         | 14.8 | 25.7 | 11.9  | 9.6         | 15.8        | 16.3 | 17.2  | 18.5       | 12.1  | 16.8 |
|                            | $\eta^2$ -cycloheptene        | 28.5 ± 0.8 | 50.1 | 31.9 | 14.7 | 24.9        | 28.1       | 28.6         | 22.0 | 40.4 | 14.0  | 7.9         | 23.8        | 26.3 | 26.9  | 29.4       | 16.9  | 25.5 |
|                            | $\eta^2$ -cyclooctene         | 34.9 ± 0.7 | 54.0 | 35.1 | 18.5 | 29.0        | 32.1       | 32.5         | 26.2 | 43.6 | 18.0  | 11.8        | 28.0        | 30.0 | 30.3  | 33.0       | 21.1  | 29.5 |
|                            | $\eta^2$ -furan               | 21.9 ± 1.0 | 40.0 | 24.4 | 11.8 | 19.9        | 22.4       | 22.9         | 17.4 | 32.5 | 11.2  | 6.7         | 18.8        | 20.3 | 20.4  | 22.8       | 13.5  | 20.4 |
|                            | S( <i>n</i> -Bu) <sub>2</sub> | 36.0 ± 1.0 | 53.3 | 36.8 | 25.3 | 32.9        | 35.4       | 36.0         | 30.2 | 45.0 | 24.6  | 19.8        | 31.5        | 32.5 | 32.8  | 35.2       | 27.0  | 32.6 |
|                            | tetrahydrothiophene           | 37.0       | 53.0 | 35.2 | 26.0 | 33.5        | 35.8       | 36.3         | 30.4 | 42.3 | 25.0  | 19.7        | 31.6        | 32.8 | 32.0  | 35.2       | 27.9  | 32.9 |
|                            | THF                           | 24.0 ± 3.0 | 33.5 | 23.0 | 14.6 | 17.4        | 19.5       | 20.3         | 17.4 | 31.1 | 15.8  | 15.7        | 18.6        | 17.4 | 22.1  | 19.9       | 13.2  | 18.6 |
|                            | thiophene                     | 19.5       | 38.4 | 23.0 | 15.7 | 21.9        | 23.9       | 24.4         | 19.7 | 30.0 | 15.2  | 11.5        | 20.8        | 21.1 | 20.4  | 23.3       | 17.1  | 21.9 |
|                            | toluene                       | 14.2 ± 0.8 | 29.8 | 19.5 | 4.9  | 11.4        | 13.9       | 14.6         | 9.6  | 28.7 | 4.9   | 2.5         | 11.1        | 12.2 | 15.5  | 15.0       | 5.7   | 11.9 |
|                            | TES                           | 27.4 ± 0.8 | 52.2 | 31.3 | 14.3 | 25.9        | 29.5       | 29.7         | 22.8 | 42.1 | 13.7  | 6.2         | 24.7        | 27.4 | 25.7  | 30.6       | 17.6  | 24.6 |
| BzCr(CO) <sub>2</sub> L    | $\eta^2$ -2,3-dihydrofuran    | 21.0 ± 1.0 | 42.9 | 26.4 | 11.5 | 20.2        | 23.2       | 23.8         | 18.5 | 34.3 | 11.6  | 8.9         | 20.3        | 21.7 | 23.0  | 24.7       | 12.7  | 20.8 |
|                            | $\eta^2$ -3-hexyne            | 22.8 ± 0.4 | 43.9 | 27.1 | 11.7 | 20.7        | 23.8       | 24.5         | 18.9 | 39.9 | 11.8  | 8.9         | 20.8        | 21.6 | 22.7  | 24.9       | 13.6  | 21.2 |
|                            | $\eta^2$ -benzene             | 11.5 ± 0.9 | 18.7 | 12.8 | 0.0  | 4.5         | 6.7        | 7.4          | 4.1  | 21.9 | 0.7   | 0.6         | 5.5         | 5.9  | 10.4  | 8.4        | 0.5   | 5.2  |
|                            | TES                           | 24.3 ± 1.2 | 43.2 | 24.9 | 8.1  | 18.6        | 22.1       | 22.5         | 17.4 | 38.0 | 8.9   | 6.0         | 19.5        | 20.6 | 20.7  | 23.8       | 10.1  | 18.1 |
|                            | THF                           | 21.4 ± 0.8 | 30.2 | 20.6 | 12.3 | 15.0        | 17.1       | 17.8         | 14.4 | 28.5 | 12.8  | 12.3        | 15.6        | 15.3 | 19.5  | 17.8       | 11.0  | 15.9 |
| Cr(CO) <sub>5</sub> L      | $\eta^2$ -benzene             | 11.4 ± 1.1 | 21.8 | 14.6 | 2.7  | 7.5         | 9.7        | 10.3         | 7.8  | 23.5 | 4.1   | 4.2         | 9.2         | 8.7  | 13.0  | 11.2       | 3.5   | 8.4  |
|                            | $\eta^2$ -3-hexyne            | 18.3 ± 0.7 | 38.1 | 20.6 | 7.4  | 16.0        | 19.1       | 19.8         | 16.0 | 31.5 | 9.0   | 7.9         | 18.0        | 17.3 | 19.5  | 20.6       | 9.0   | 17.2 |
| CpRe(CO) <sub>2</sub> L    | heptane                       | 13.7 ± 0.2 | 24.8 | 15.3 | 5.6  | 10.7        | 12.4       | 12.9         | 11.8 | 26.4 | 7.8   | 8.7         | 13.0        | 10.0 | 11.4  | 11.9       | 7.2   | 11.1 |
| (DMP)Mn(CO) <sub>2</sub> L | THF                           | 22.1 ± 0.5 | 35.3 | 24.6 | 16.4 | 19.2        | 21.3       | 22.0         | 18.3 | 31.6 | 16.7  | 15.6        | 19.4        | 19.1 | 22.7  | 21.6       | 14.9  | 20.2 |
|                            | $\eta^2$ -benzene             | 14.9 ± 1.4 | 33.5 | 22.3 | 7.8  | 14.3        | 16.9       | 17.4         | 11.4 | 29.7 | 6.7   | 3.3         | 12.8        | 15.7 | 17.2  | 18.4       | 8.9   | 14.5 |
| TpRe(CO) <sub>2</sub> L    | bromohexane                   | 21.1 ± 0.4 | 34.0 | 20.4 | 13.5 | 18.8        | 20.8       | 21.3         | 16.3 | 28.1 | 12.6  | 9.5         | 17.3        | 18.8 | 18.9  | 20.9       | 14.3  | 18.9 |
|                            | THF                           | 23.9 ± 0.9 | 35.8 | 30.5 | 15.8 | 18.9        | 21.1       | 22.1         | 20.5 | 40.2 | 18.5  | 20.5        | 22.0        | 19.0 | 26.5  | 21.8       | 15.4  | 20.8 |
|                            |                               | MSE        | 16.4 | 2.5  | -9.8 | -2.9        | -0.4       | 0.2          | -4.5 | 11.4 | -9.6  | -12.4       | -3.0        | -2.4 | -0.7  | 0.3        | -8.7  | -2.6 |
|                            |                               | MUE        | 16.4 | 2.9  | 9.8  | 3.2         | 2.0        | 1.9          | 4.5  | 11.4 | 9.6   | 12.4        | 3.1         | 2.8  | 2.0   | 2.1        | 8.7   | 2.9  |
|                            |                               | RMSD       | 17.1 | 3.5  | 10.3 | 3.8         | 2.5        | 2.4          | 5.0  | 11.8 | 10.2  | 13.5        | 3.7         | 3.4  | 2.3   | 2.5        | 9.1   | 3.4  |
|                            |                               | MAXD       | 24.8 | 7.4  | 16.4 | 7.0         | 4.8        | 4.9          | 8.7  | 17.1 | 16.9  | 23.1        | 6.9         | 6.6  | 5.0   | 4.2        | 14.2  | 6.3  |

| Complex                    | Ligand L                      | Expt.      | HMGGGA |        |        |      |       | RS-HGGA |          |                  |              |               | Ab Initio      |       |
|----------------------------|-------------------------------|------------|--------|--------|--------|------|-------|---------|----------|------------------|--------------|---------------|----------------|-------|
|                            |                               |            | BMK    | M06-2X | M06-HF | M06  | TPSSh | HSE2PBE | HSHE1PBE | LC- $\omega$ PBE | $\omega$ B97 | $\omega$ B97X | $\omega$ B97XD | HF    |
| CpMn(CO) <sub>2</sub> L    | $\eta^2$ -2,3-dihydrofuran    | 28.4 ± 1.0 | 22.7   | 22.3   | 22.0   | 30.8 | 27.1  | 26.7    | 26.9     | 27.2             | 25.6         | 24.0          | 27.9           | -13.0 |
|                            | chloropropane                 | 16.0 ± 0.6 | 13.4   | 15.9   | 17.2   | 17.7 | 15.8  | 16.0    | 16.1     | 15.1             | 16.1         | 15.5          | 16.5           | -1.3  |
|                            | $\eta^2$ -cycloheptene        | 28.5 ± 0.8 | 19.9   | 20.4   | 20.7   | 27.5 | 23.9  | 23.4    | 23.5     | 23.9             | 22.7         | 21.1          | 26.2           | -16.5 |
|                            | $\eta^2$ -cyclooctene         | 34.9 ± 0.7 | 23.9   | 23.7   | 24.2   | 31.6 | 27.9  | 27.5    | 27.7     | 28.4             | 26.7         | 25.1          | 29.9           | -12.9 |
|                            | $\eta^2$ -furan               | 21.9 ± 1.0 | 14.9   | 15.9   | 17.2   | 21.9 | 19.0  | 18.6    | 18.7     | 18.6             | 17.4         | 16.3          | 19.7           | -11.6 |
|                            | S( <i>n</i> -Bu) <sub>2</sub> | 36.0 ± 1.0 | 26.4   | 26.9   | 27.9   | 33.9 | 31.2  | 31.5    | 31.5     | 31.1             | 30.5         | 29.6          | 33.1           | 1.6   |
|                            | tetrahydrothiophene           | 37.0       | 26.3   | 25.6   | 26.2   | 33.2 | 31.4  | 31.6    | 31.7     | 31.1             | 30.1         | 29.3          | 31.9           | 1.2   |
|                            | THF                           | 24.0 ± 3.0 | 18.8   | 23.6   | 25.5   | 22.3 | 18.3  | 19.2    | 19.1     | 18.9             | 22.0         | 21.0          | 23.0           | 6.7   |
|                            | thiophene                     | 19.5       | 16.7   | 16.2   | 17.6   | 21.7 | 20.7  | 20.8    | 20.9     | 20.5             | 19.9         | 19.2          | 21.0           | -3.1  |
|                            | toluene                       | 14.2 ± 0.8 | 8.8    | 13.5   | 15.8   | 15.8 | 10.8  | 11.1    | 11.2     | 10.5             | 12.1         | 10.9          | 15.0           | -10.2 |
| BzCr(CO) <sub>2</sub> L    | TES                           | 27.4 ± 0.8 | 18.7   | 18.1   | 18.9   | 27.0 | 23.2  | 24.1    | 24.4     | 25.6             | 24.8         | 22.6          | 27.5           | -21.4 |
|                            | $\eta^2$ -2,3-dihydrofuran    | 21.0 ± 1.0 | 17.7   | 20.1   | 22.9   | 24.0 | 19.7  | 19.9    | 20.1     | 18.8             | 17.8         | 17.2          | 21.7           | -8.1  |
|                            | $\eta^2$ -3-hexyne            | 22.8 ± 0.4 | 18.9   | 21.0   | 25.5   | 23.7 | 20.0  | 20.5    | 20.6     | 19.1             | 18.7         | 18.4          | 24.1           | -8.6  |
|                            | $\eta^2$ -benzene             | 11.5 ± 0.9 | 4.6    | 10.4   | 12.7   | 9.8  | 4.8   | 5.7     | 5.7      | 4.8              | 7.9          | 6.8           | 10.3           | -7.1  |
|                            | TES                           | 24.3 ± 1.2 | 16.2   | 18.2   | 22.4   | 22.2 | 17.3  | 18.9    | 19.2     | 19.2             | 18.7         | 17.7          | 23.3           | -12.4 |
| Cr(CO) <sub>5</sub> L      | THF                           | 21.4 ± 0.8 | 15.5   | 20.1   | 21.0   | 19.3 | 15.3  | 16.1    | 16.0     | 15.2             | 18.3         | 17.5          | 19.6           | 3.6   |
|                            | $\eta^2$ -benzene             | 11.4 ± 1.1 | 8.5    | 13.9   | 16.7   | 12.7 | 8.3   | 9.3     | 9.4      | 8.9              | 11.8         | 10.6          | 13.3           | -3.5  |
| CpRe(CO) <sub>2</sub> L    | $\eta^2$ -3-hexyne            | 18.3 ± 0.7 | 17.6   | 20.0   | 24.9   | 20.5 | 16.8  | 17.6    | 17.8     | 17.5             | 18.0         | 17.2          | 20.5           | -7.4  |
|                            | heptane                       | 13.7 ± 0.2 | 10.7   | 13.5   | 17.7   | 13.4 | 11.5  | 13.0    | 13.0     | 13.8             | 14.2         | 13.6          | 16.4           | 1.3   |
| (DMP)Mn(CO) <sub>2</sub> L | THF                           | 22.1 ± 0.5 | 19.1   | 23.5   | 24.7   | 22.7 | 19.4  | 19.9    | 19.9     | 19.5             | 22.5         | 21.5          | 23.3           | 5.8   |
|                            | $\eta^2$ -benzene             | 14.9 ± 1.4 | 10.3   | 14.1   | 16.0   | 16.8 | 13.0  | 12.9    | 13.0     | 12.3             | 13.9         | 12.4          | 16.4           | -10.1 |
| TpRe(CO) <sub>2</sub> L    | bromohexane                   | 21.1 ± 0.4 | 14.0   | 16.1   | 17.2   | 19.6 | 17.6  | 17.4    | 17.5     | 16.6             | 16.9         | 16.3          | 17.9           | -2.1  |
|                            | THF                           | 23.9 ± 0.9 | 23.2   | 28.9   | 31.9   | 27.0 | 21.1  | 22.6    | 22.6     | 23.2             | 28.1         | 26.5          | 30.1           | 13.2  |
|                            |                               | MSE        | -5.5   | -3.2   | -1.2   | 0.0  | -3.5  | -3.0    | -2.9     | -3.2             | -2.6         | -3.6          | -0.2           | -27.4 |
|                            |                               | MUE        | 5.5    | 4.1    | 4.5    | 1.8  | 3.6   | 3.1     | 3.1      | 3.3              | 3.1          | 3.9           | 2.0            | 27.4  |
|                            |                               | RMSD       | 6.3    | 5.4    | 5.5    | 2.0  | 4.1   | 3.7     | 3.6      | 3.9              | 3.8          | 4.6           | 2.6            | 29.6  |
|                            |                               | MAXD       | 11.0   | 11.4   | 10.8   | 3.8  | 7.0   | 7.4     | 7.2      | 6.7              | 8.2          | 9.8           | 6.2            | 48.8  |

**Table S8:** BDEs calculated at M06 reference geometries for full database (**Table 1**) for all DFT functionals and methods (**Table 2**) used in the benchmark study.

| Complex                                    | Ligand L                         | Expt.                            | LSDA       |       | GGA  |       |      |          |          |            |      |          |          |            |      |         |           |
|--------------------------------------------|----------------------------------|----------------------------------|------------|-------|------|-------|------|----------|----------|------------|------|----------|----------|------------|------|---------|-----------|
|                                            |                                  |                                  | SVWN       | SVWN5 | B97D | B97D3 | BLYP | BLYP-GD2 | BLYP-GD3 | BLYP-GD3BJ | BP86 | BP86-GD2 | BP86-GD3 | BP86-GD3BJ | BPBE | BPE-GD3 | BPE-GD3BJ |
| CpMn(CO) <sub>2</sub> L                    | η <sup>2</sup> -2,3-dihydrofuran | 28.4 ± 1.0                       | 53.4       | 52.3  | 33.8 | 31.6  | 18.5 | 34.7     | 30.2     | 31.9       | 28.2 | 42.3     | 39.1     | 39.6       | 26.4 | 39.7    | 40.7      |
|                                            | chloropropane                    | 16.0 ± 0.6                       | 31.4       | 30.8  | 17.7 | 19.4  | 12.3 | 19.2     | 19.5     | 21.0       | 16.5 | 22.5     | 23.3     | 24.2       | 14.7 | 22.9    | 24.1      |
|                                            | η <sup>2</sup> -cycloheptene     | 28.5 ± 0.8                       | 50.3       | 49.1  | 32.0 | 29.2  | 14.8 | 33.2     | 28.3     | 29.8       | 24.5 | 40.6     | 37.2     | 37.6       | 22.6 | 37.9    | 38.8      |
|                                            | η <sup>2</sup> -cyclooctene      | 34.9 ± 0.7                       | 54.0       | 52.9  | 35.3 | 32.7  | 18.5 | 36.1     | 31.5     | 33.0       | 28.5 | 43.9     | 40.6     | 41.0       | 26.7 | 41.4    | 42.2      |
|                                            | η <sup>2</sup> -furan            | 21.9 ± 1.0                       | 41.0       | 40.0  | 24.6 | 23.3  | 11.6 | 25.6     | 21.7     | 23.9       | 19.7 | 31.9     | 29.2     | 30.3       | 18.0 | 29.6    | 31.3      |
|                                            | S( <i>n</i> -Bu) <sub>2</sub>    | 36.0 ± 1.0                       | 53.0       | 52.1  | 36.7 | 38.9  | 25.2 | 37.5     | 37.0     | 39.7       | 32.3 | 43.0     | 43.4     | 45.2       | 30.5 | 43.9    | 46.2      |
|                                            | tetrahydrothiophene              | 37.0                             | 53.5       | 52.6  | 35.9 | 38.5  | 26.7 | 36.6     | 36.6     | 39.3       | 33.6 | 42.3     | 42.9     | 44.9       | 32.0 | 43.2    | 45.7      |
|                                            | THF                              | 24.0 ± 3.0                       | 33.5       | 32.9  | 23.0 | 25.4  | 14.7 | 28.7     | 27.7     | 27.6       | 17.6 | 30.5     | 30.2     | 29.6       | 14.9 | 29.5    | 29.0      |
|                                            | thiophene                        | 19.5                             | 37.7       | 36.9  | 22.9 | 25.9  | 14.9 | 23.8     | 23.8     | 27.1       | 20.6 | 28.5     | 29.1     | 31.7       | 19.0 | 29.2    | 32.4      |
|                                            | toluene                          | 14.2 ± 0.8                       | 32.0       | 31.1  | 19.5 | 17.8  | 4.0  | 20.6     | 16.9     | 18.8       | 11.1 | 25.6     | 23.2     | 24.3       | 9.0  | 23.7    | 25.2      |
|                                            | TES                              | 27.4 ± 0.8                       | 53.3       | 52.2  | 32.1 | 33.0  | 14.9 | 32.4     | 29.4     | 33.0       | 26.0 | 41.4     | 39.6     | 42.0       | 24.3 | 40.8    | 43.9      |
|                                            | BzCr(CO) <sub>2</sub> L          | η <sup>2</sup> -2,3-dihydrofuran | 21.0 ± 1.0 | 43.7  | 42.7 | 26.6  | 24.9 | 11.3     | 28.0     | 22.8       | 25.6 | 19.9     | 34.5     | 30.6       | 32.1 | 17.9    | 31.0      |
| η <sup>2</sup> -3-hexyne                   |                                  | 22.8 ± 0.4                       | 43.7       | 42.6  | 27.2 | 28.3  | 11.6 | 28.2     | 25.1     | 28.8       | 19.9 | 34.5     | 32.6     | 35.1       | 17.8 | 33.2    | 36.6      |
| η <sup>2</sup> -benzene                    |                                  | 11.5 ± 0.9                       | 21.6       | 20.9  | 13.6 | 13.7  | 0.0  | 14.6     | 11.1     | 14.6       | 5.1  | 17.8     | 15.5     | 18.0       | 3.1  | 15.7    | 19.0      |
| TES                                        |                                  | 24.3 ± 1.2                       | 43.6       | 42.6  | 25.5 | 27.3  | 8.8  | 26.4     | 23.6     | 27.9       | 18.4 | 33.8     | 32.2     | 35.4       | 16.6 | 33.3    | 37.3      |
| Cr(CO) <sub>5</sub> L                      | THF                              | 21.4 ± 0.8                       | 30.0       | 29.4  | 20.5 | 23.2  | 11.2 | 26.1     | 23.9     | 25.2       | 14.2 | 27.9     | 26.5     | 27.0       | 11.6 | 25.8    | 26.7      |
|                                            | η <sup>2</sup> -benzene          | 11.4 ± 1.1                       | 23.3       | 22.7  | 14.8 | 17.6  | 2.5  | 15.6     | 13.7     | 18.3       | 7.4  | 18.9     | 17.9     | 21.4       | 5.6  | 18.3    | 22.7      |
| CpRe(CO) <sub>2</sub> L                    | η <sup>2</sup> -3-hexyne         | 18.3 ± 0.7                       | 38.5       | 37.5  | 20.8 | 20.5  | 7.3  | 22.2     | 18.8     | 21.4       | 15.4 | 28.4     | 26.1     | 27.8       | 13.2 | 26.2    | 28.7      |
|                                            | heptane                          | 13.7 ± 0.2                       | 24.1       | 23.5  | 15.2 | 14.1  | 5.8  | 15.5     | 13.4     | 14.5       | 10.5 | 18.9     | 17.6     | 18.3       | 9.0  | 17.5    | 18.4      |
| (DMP)Mn(CO) <sub>2</sub> L                 | THF                              | 22.1 ± 0.5                       | 34.8       | 34.2  | 24.2 | 26.5  | 15.9 | 29.9     | 28.5     | 28.7       | 18.9 | 31.8     | 31.2     | 30.8       | 16.2 | 30.4    | 30.2      |
|                                            | η <sup>2</sup> -benzene          | 14.9 ± 1.4                       | 36.1       | 35.2  | 23.0 | 21.3  | 8.0  | 23.9     | 19.9     | 22.0       | 15.1 | 29.1     | 26.3     | 27.6       | 13.1 | 26.7    | 28.5      |
| TpRe(CO) <sub>2</sub> L                    | bromohexane                      | 21.1 ± 0.4                       | 34.6       | 33.9  | 20.5 | 22.1  | 13.4 | 21.4     | 21.5     | 23.4       | 18.6 | 25.6     | 26.3     | 27.7       | 17.1 | 26.3    | 28.0      |
|                                            | THF                              | 23.9 ± 0.9                       | 36.0       | 35.4  | 30.9 | 26.9  | 16.3 | 35.9     | 30.7     | 28.5       | 19.4 | 37.2     | 33.5     | 31.1       | 16.5 | 32.6    | 30.1      |
| CpRu(CO)(Cl)L                              | η <sup>2</sup> -cyclopentene     | 18.8 ± 1.1                       | 36.1       | 35.0  | 22.2 | 19.8  | 4.6  | 22.5     | 16.9     | 20.0       | 13.5 | 29.2     | 25.1     | 26.8       | 11.8 | 26.0    | 28.3      |
|                                            | η <sup>2</sup> -cyclohexene      | 17.2 ± 1.4                       | 32.2       | 31.2  | 18.8 | 16.9  | 1.6  | 19.4     | 14.7     | 17.5       | 10.1 | 25.7     | 22.4     | 24.1       | 8.1  | 23.2    | 25.4      |
|                                            | η <sup>2</sup> -cyclooctene      | 21.0 ± 0.6                       | 35.7       | 34.6  | 22.2 | 20.4  | 4.6  | 22.4     | 17.7     | 20.5       | 13.4 | 29.0     | 25.8     | 27.4       | 11.6 | 26.6    | 28.9      |
|                                            | THF                              | 13.7 ± 0.3                       | 22.5       | 21.8  | 14.3 | 17.1  | 4.0  | 19.3     | 17.3     | 18.5       | 7.2  | 21.3     | 20.2     | 20.6       | 4.7  | 19.9    | 20.5      |
| (μ-pdt)Fe <sub>2</sub> (CO) <sub>5</sub> L | η <sup>2</sup> -3-hexyne         | 20.9 ± 0.4                       | 39.9       | 38.8  | 21.6 | 21.0  | 5.7  | 22.9     | 20.9     | 21.8       | 14.8 | 29.8     | 29.1     | 29.1       | 12.4 | 29.6    | 30.2      |
|                                            | η <sup>2</sup> -cyclohexene      | 19.7 ± 0.6                       | 37.3       | 36.2  | 21.3 | 17.3  | 3.7  | 22.8     | 18.8     | 18.3       | 12.7 | 29.5     | 27.0     | 25.7       | 10.5 | 27.7    | 26.7      |
|                                            | η <sup>2</sup> -2,3-dihydrofuran | 20.9 ± 1.6                       | 39.2       | 38.1  | 21.9 | 19.0  | 7.1  | 23.2     | 20.0     | 19.8       | 15.8 | 29.9     | 28.0     | 27.0       | 13.7 | 28.5    | 27.7      |
|                                            | MUE                              | 16.7                             | 15.8       | 2.7   | 2.7  | 10.9  | 4.1  | 2.2      | 3.5      | 4.0        | 9.3  | 7.5      | 8.6      | 5.9        | 7.8  | 9.3     |           |
|                                            | MSE                              | 16.7                             | 15.8       | 2.4   | 2.2  | -10.9 | 4.1  | 1.2      | 3.1      | -3.9       | 9.3  | 7.5      | 8.6      | -5.9       | 7.8  | 9.3     |           |
|                                            | RMSD                             | 17.3                             | 16.4       | 3.3   | 3.3  | 11.4  | 4.8  | 2.8      | 4.0      | 4.6        | 9.7  | 7.8      | 8.9      | 6.5        | 8.1  | 9.8     |           |
|                                            | MAXD                             | 25.9                             | 24.8       | 8.1   | 6.4  | 16.4  | 12.0 | 6.8      | 7.6      | 7.6        | 14.2 | 12.2     | 14.6     | 9.8        | 13.4 | 16.5    |           |

| Complex                                    | Ligand L                         | Expt.      | GGA   |        |      |            |            |             |       |      |        |                |                |                  |              |         |
|--------------------------------------------|----------------------------------|------------|-------|--------|------|------------|------------|-------------|-------|------|--------|----------------|----------------|------------------|--------------|---------|
|                                            |                                  |            | BPW91 | G96LYP | HCTH | MPW<br>LYP | MPW<br>PBE | MPW<br>PW91 | N12   | OLYP | PBEPBE | PBEPBE-<br>GD2 | PBEPBE-<br>GD3 | PBEPBE-<br>GD3BJ | PW91<br>PW91 | SOGGA11 |
| CpMn(CO) <sub>2</sub> L                    | η <sup>2</sup> -2,3-dihydrofuran | 28.4 ± 1.0 | 25.7  | 15.8   | 18.5 | 21.4       | 29.3       | 28.7        | 28.1  | 15.6 | 31.8   | 41.9           | 37.4           | 38.4             | 32.2         | 36.1    |
|                                            | chloropropane                    | 16.0 ± 0.6 | 14.5  | 9.5    | 10.2 | 14.4       | 16.9       | 16.7        | 15.3  | 7.3  | 18.5   | 22.8           | 22.2           | 22.8             | 19.1         | 18.2    |
|                                            | η <sup>2</sup> -cycloheptene     | 28.5 ± 0.8 | 21.9  | 11.7   | 14.0 | 17.8       | 25.7       | 25.0        | 24.4  | 10.8 | 28.3   | 39.8           | 35.1           | 35.9             | 28.7         | 31.5    |
|                                            | η <sup>2</sup> -cyclooctene      | 34.9 ± 0.7 | 26.0  | 15.7   | 18.4 | 21.5       | 29.7       | 29.0        | 28.4  | 15.4 | 32.2   | 43.2           | 38.7           | 39.5             | 32.6         | 36.3    |
|                                            | η <sup>2</sup> -furan            | 21.9 ± 1.0 | 17.5  | 9.0    | 10.6 | 14.1       | 20.7       | 20.1        | 19.3  | 8.2  | 22.8   | 31.5           | 27.7           | 28.9             | 23.2         | 26.4    |
|                                            | S( <i>n</i> -Bu) <sub>2</sub>    | 36.0 ± 1.0 | 30.1  | 22.2   | 24.7 | 27.9       | 33.2       | 32.8        | 31.3  | 21.1 | 35.3   | 43.0           | 41.5           | 42.6             | 35.9         | 37.6    |
|                                            | tetrahydrothiophene              | 37.0       | 31.6  | 24.1   | 26.3 | 29.1       | 34.5       | 34.1        | 32.7  | 23.1 | 36.4   | 42.6           | 41.5           | 42.6             | 36.9         | 37.7    |
|                                            | THF                              | 24.0 ± 3.0 | 14.9  | 11.0   | 11.3 | 17.2       | 17.5       | 17.5        | 19.9  | 7.1  | 19.5   | 29.8           | 27.9           | 28.0             | 20.3         | 21.7    |
|                                            | thiophene                        | 19.5       | 18.7  | 12.3   | 13.6 | 17.1       | 21.3       | 21.0        | 19.6  | 10.7 | 23.0   | 28.6           | 27.6           | 29.0             | 23.6         | 24.3    |
|                                            | toluene                          | 14.2 ± 0.8 | 8.7   | 0.5    | 2.6  | 6.8        | 11.9       | 11.6        | 10.1  | -1.2 | 14.4   | 24.7           | 20.9           | 21.8             | 14.9         | 18.6    |
| BzCr(CO) <sub>2</sub> L                    | TES                              | 27.4 ± 0.8 | 23.6  | 11.6   | 16.8 | 18.0       | 27.5       | 26.8        | 26.0  | 12.4 | 30.5   | 41.5           | 37.9           | 39.6             | 30.7         | 30.8    |
|                                            | η <sup>2</sup> -2,3-dihydrofuran | 21.0 ± 1.0 | 17.4  | 8.1    | 9.8  | 14.3       | 20.9       | 20.4        | 19.7  | 6.8  | 23.5   | 33.9           | 29.0           | 30.6             | 24.0         | 28.7    |
|                                            | η <sup>2</sup> -3-hexyne         | 22.8 ± 0.4 | 17.3  | 7.8    | 10.8 | 14.8       | 21.1       | 20.6        | 19.5  | 7.1  | 23.8   | 34.2           | 30.7           | 32.6             | 24.4         | 30.9    |
|                                            | η <sup>2</sup> -benzene          | 11.5 ± 0.9 | 2.9   | -3.6   | -1.8 | 2.6        | 5.7        | 5.5         | 4.1   | -5.8 | 7.9    | 17.0           | 13.6           | 15.3             | 8.5          | 11.0    |
|                                            | TES                              | 24.3 ± 1.2 | 16.0  | 5.1    | 9.1  | 12.0       | 19.9       | 19.3        | 18.5  | 4.9  | 22.8   | 33.8           | 30.2           | 32.4             | 23.2         | 25.7    |
| Cr(CO) <sub>5</sub> L                      | THF                              | 21.4 ± 0.8 | 11.6  | 7.3    | 7.9  | 13.8       | 14.2       | 14.2        | 16.3  | 3.6  | 16.3   | 27.2           | 24.6           | 25.3             | 17.1         | 19.4    |
|                                            | η <sup>2</sup> -benzene          | 11.4 ± 1.1 | 5.4   | -1.1   | 1.3  | 5.0        | 8.1        | 8.0         | 7.0   | -2.6 | 10.3   | 18.4           | 15.9           | 18.0             | 10.9         | 11.7    |
| CpRe(CO) <sub>2</sub> L                    | η <sup>2</sup> -3-hexyne         | 18.3 ± 0.7 | 12.7  | 3.3    | 6.1  | 10.5       | 16.5       | 16.0        | 15.7  | 2.4  | 19.2   | 28.5           | 25.1           | 26.4             | 19.8         | 22.6    |
|                                            | heptane                          | 13.7 ± 0.2 | 8.7   | 3.6    | 4.5  | 7.7        | 10.9       | 10.6        | 9.4   | 1.7  | 12.2   | 18.3           | 16.3           | 16.7             | 12.8         | 10.7    |
| (DMP)Mn(CO) <sub>2</sub> L                 | THF                              | 22.1 ± 0.5 | 16.2  | 12.2   | 12.3 | 18.4       | 18.8       | 18.7        | 20.7  | 8.3  | 20.8   | 31.1           | 29.2           | 29.3             | 21.6         | 22.7    |
|                                            | η <sup>2</sup> -benzene          | 14.9 ± 1.4 | 12.7  | 4.8    | 6.7  | 10.7       | 15.9       | 15.5        | 14.2  | 2.9  | 18.2   | 28.1           | 24.3           | 25.3             | 18.7         | 20.0    |
|                                            | bromohexane                      | 21.1 ± 0.4 | 16.8  | 10.9   | 12.3 | 15.6       | 19.3       | 19.0        | 17.4  | 9.3  | 21.0   | 25.9           | 25.1           | 25.8             | 21.5         | 23.4    |
| TpRe(CO) <sub>2</sub> L                    | THF                              | 23.9 ± 0.9 | 16.5  | 12.0   | 13.6 | 19.1       | 19.3       | 19.3        | 22.2  | 8.2  | 21.5   | 35.3           | 31.1           | 30.2             | 22.5         | 21.9    |
|                                            | η <sup>2</sup> -cyclopentene     | 18.8 ± 1.1 | 11.2  | 1.6    | 3.8  | 7.4        | 14.7       | 14.2        | 13.9  | 0.9  | 17.0   | 28.2           | 23.0           | 24.6             | 17.6         | 20.5    |
| CpRu(CO)(Cl)L                              | η <sup>2</sup> -cyclohexene      | 17.2 ± 1.4 | 7.6   | -1.6   | -0.2 | 4.5        | 11.1       | 10.6        | 10.0  | -3.3 | 13.4   | 24.6           | 19.8           | 21.3             | 14.1         | 14.5    |
|                                            | η <sup>2</sup> -cyclooctene      | 21.0 ± 0.6 | 11.1  | 1.5    | 3.5  | 7.4        | 14.5       | 14.0        | 13.6  | 0.4  | 16.8   | 28.0           | 23.4           | 24.7             | 17.4         | 18.3    |
|                                            | THF                              | 13.7 ± 0.3 | 4.7   | 0.2    | 0.9  | 6.5        | 7.3        | 7.3         | 9.6   | -3.3 | 9.3    | 20.5           | 17.7           | 18.4             | 10.2         | 9.4     |
|                                            | η <sup>2</sup> -3-hexyne         | 20.9 ± 0.4 | 11.9  | 1.6    | 4.6  | 9.1        | 15.9       | 15.4        | 14.7  | 0.6  | 18.9   | 29.6           | 26.9           | 27.3             | 19.5         | 23.2    |
| (μ-pdt)Fe <sub>2</sub> (CO) <sub>5</sub> L | η <sup>2</sup> -cyclohexene      | 19.7 ± 0.6 | 10.0  | -0.1   | 1.9  | 6.9        | 13.8       | 13.3        | 12.9  | -1.7 | 16.7   | 28.6           | 24.5           | 24.4             | 17.2         | 19.6    |
|                                            | η <sup>2</sup> -2,3-dihydrofuran | 20.9 ± 1.6 | 13.2  | 3.8    | 5.3  | 10.1       | 16.8       | 16.3        | 15.6  | 2.0  | 19.4   | 29.5           | 26.0           | 26.0             | 19.9         | 21.5    |
|                                            |                                  | MUE        | 6.3   | 14.2   | 12.2 | 8.2        | 3.4        | 3.7         | 3.9   | 15.8 | 2.2    | 8.8            | 5.6            | 6.6              | 2.0          | 2.9     |
|                                            | MSE                              | -6.3       | -14.2 | -12.2  | -8.2 | -3.1       | -3.5       | -3.9        | -15.8 | -0.8 | 8.8    | 5.6            | 6.6            | -0.2             | 1.6          |         |
|                                            | RMSD                             | 6.8        | 14.6  | 12.6   | 8.8  | 4.0        | 4.3        | 4.4         | 16.1  | 2.6  | 9.2    | 6.0            | 7.0            | 2.4              | 3.6          |         |
|                                            | MAXD                             | 9.9        | 19.8  | 17.8   | 13.6 | 7.2        | 7.2        | 7.4         | 21.4  | 5.1  | 14.1   | 10.5           | 12.2           | 4.3              | 8.1          |         |



| Complex                                    | Ligand L                         | Expt.      | HGGA |       |       |       |               |               |                 |       |        |                |                  |       |       |      |      |  |  |
|--------------------------------------------|----------------------------------|------------|------|-------|-------|-------|---------------|---------------|-----------------|-------|--------|----------------|------------------|-------|-------|------|------|--|--|
|                                            |                                  |            | APF  | APFD  | B1LYP | B3LYP | B3LYP-<br>GD2 | B3LYP-<br>GD3 | B3LYP-<br>GD3BJ | B3P86 | B3PW91 | B3PW91-<br>GD3 | B3PW91-<br>GD3BJ | B97-1 | B97-2 | B98  | BH&H |  |  |
| CpMn(CO) <sub>2</sub> L                    | η <sup>2</sup> -2,3-dihydrofuran | 28.4 ± 1.0 | 25.6 | 40.9  | 15.2  | 17.6  | 31.7          | 27.1          | 28.7            | 26.2  | 23.1   | 33.9           | 34.9             | 23.0  | 19.8  | 21.4 | 34.3 |  |  |
|                                            | chloropropane                    | 16.0 ± 0.6 | 14.9 | 25.9  | 10.9  | 12.0  | 18.0          | 18.0          | 19.3            | 15.7  | 13.5   | 20.2           | 21.3             | 14.2  | 11.6  | 13.4 | 22.1 |  |  |
|                                            | η <sup>2</sup> -cycloheptene     | 28.5 ± 0.8 | 22.1 | 40.5  | 11.7  | 14.1  | 30.2          | 25.2          | 26.6            | 22.9  | 19.6   | 32.1           | 33.0             | 19.8  | 16.2  | 18.2 | 31.4 |  |  |
|                                            | η <sup>2</sup> -cyclooctene      | 34.9 ± 0.7 | 26.3 | 43.7  | 15.6  | 18.0  | 33.4          | 28.7          | 30.0            | 26.9  | 23.8   | 35.8           | 36.6             | 23.7  | 20.4  | 22.1 | 35.3 |  |  |
|                                            | η <sup>2</sup> -furan            | 21.9 ± 1.0 | 17.6 | 32.4  | 9.0   | 10.9  | 23.2          | 19.3          | 21.2            | 18.2  | 15.5   | 24.9           | 26.4             | 15.6  | 12.6  | 14.3 | 25.5 |  |  |
|                                            | S( <i>n</i> -Bu) <sub>2</sub>    | 36.0 ± 1.0 | 30.0 | 44.9  | 22.6  | 24.5  | 35.3          | 34.3          | 36.6            | 30.9  | 28.1   | 39.1           | 41.1             | 28.4  | 25.6  | 27.2 | 37.8 |  |  |
|                                            | tetrahydrothiophene              | 37.0       | 31.0 | 43.0  | 23.7  | 25.6  | 34.3          | 33.8          | 36.2            | 31.9  | 29.3   | 38.5           | 40.6             | 29.3  | 26.8  | 28.2 | 37.8 |  |  |
|                                            | THF                              | 24.0 ± 3.0 | 17.5 | 31.2  | 15.4  | 15.9  | 28.7          | 27.2          | 27.4            | 18.5  | 15.7   | 28.2           | 28.0             | 17.3  | 14.0  | 16.6 | 28.3 |  |  |
|                                            | thiophene                        | 19.5       | 18.9 | 30.3  | 13.1  | 14.5  | 22.3          | 21.9          | 24.8            | 19.7  | 17.3   | 25.7           | 28.3             | 17.8  | 15.2  | 16.9 | 26.0 |  |  |
|                                            | toluene                          | 14.2 ± 0.8 | 9.4  | 29.0  | 2.0   | 3.7   | 18.1          | 14.2          | 16.0            | 10.0  | 7.1    | 19.1           | 20.4             | 8.2   | 4.6   | 6.9  | 18.6 |  |  |
| BzCr(CO) <sub>2</sub> L                    | TES                              | 27.4 ± 0.8 | 23.5 | 42.9  | 11.2  | 13.9  | 29.3          | 25.9          | 29.0            | 23.8  | 20.7   | 34.2           | 36.8             | 20.2  | 17.4  | 18.0 | 31.3 |  |  |
|                                            | η <sup>2</sup> -2,3-dihydrofuran | 21.0 ± 1.0 | 18.7 | 34.5  | 9.6   | 11.4  | 26.0          | 20.8          | 23.3            | 19.1  | 16.1   | 26.6           | 28.7             | 16.7  | 12.9  | 15.3 | 29.8 |  |  |
|                                            | η <sup>2</sup> -3-hexyne         | 22.8 ± 0.4 | 18.9 | 40.1  | 10.0  | 11.7  | 26.3          | 22.6          | 26.2            | 19.3  | 16.2   | 28.6           | 31.7             | 17.7  | 13.5  | 16.2 | 30.1 |  |  |
|                                            | η <sup>2</sup> -benzene          | 11.5 ± 0.9 | 4.8  | 22.5  | -0.4  | 0.6   | 13.3          | 9.6           | 12.7            | 5.1   | 2.7    | 12.9           | 15.8             | 4.4   | 1.0   | 3.3  | 14.0 |  |  |
|                                            | TES                              | 24.3 ± 1.2 | 17.9 | 38.7  | 7.5   | 9.4   | 24.7          | 21.4          | 25.3            | 17.9  | 14.9   | 28.5           | 32.0             | 15.7  | 12.0  | 13.9 | 28.9 |  |  |
| Cr(CO) <sub>5</sub> L                      | THF                              | 21.4 ± 0.8 | 13.5 | 28.1  | 11.1  | 11.8  | 25.3          | 22.8          | 24.0            | 14.4  | 11.7   | 24.0           | 24.8             | 13.6  | 10.1  | 12.7 | 23.7 |  |  |
|                                            | η <sup>2</sup> -benzene          | 11.4 ± 1.1 | 8.1  | 23.6  | 3.1   | 3.9   | 15.3          | 13.1          | 17.0            | 8.3   | 6.0    | 16.3           | 20.1             | 7.8   | 4.6   | 6.7  | 17.6 |  |  |
| CpRe(CO) <sub>2</sub> L                    | η <sup>2</sup> -3-hexyne         | 18.3 ± 0.7 | 16.0 | 31.6  | 7.6   | 8.9   | 22.0          | 18.2          | 20.6            | 16.2  | 13.1   | 23.7           | 25.8             | 14.9  | 10.5  | 13.4 | 28.6 |  |  |
|                                            | heptane                          | 13.7 ± 0.2 | 11.6 | 25.9  | 7.4   | 7.9   | 16.3          | 14.2          | 15.2            | 11.9  | 10.0   | 17.1           | 17.8             | 10.6  | 8.4   | 10.1 | 20.6 |  |  |
| (DMP)Mn(CO) <sub>2</sub> L                 | THF                              | 22.1 ± 0.5 | 17.7 | 31.3  | 15.4  | 16.2  | 29.0          | 27.3          | 27.6            | 18.8  | 16.1   | 28.4           | 28.3             | 17.7  | 14.3  | 16.9 | 27.5 |  |  |
|                                            | η <sup>2</sup> -benzene          | 14.9 ± 1.4 | 12.1 | 30.9  | 4.7   | 6.6   | 20.6          | 16.5          | 18.4            | 13.0  | 10.1   | 21.2           | 22.8             | 10.8  | 7.6   | 9.5  | 20.4 |  |  |
| TpRe(CO) <sub>2</sub> L                    | bromohexane                      | 21.1 ± 0.4 | 16.4 | 28.5  | 11.0  | 12.5  | 19.4          | 19.3          | 20.9            | 17.1  | 14.9   | 22.5           | 23.9             | 15.3  | 12.9  | 14.4 | 22.7 |  |  |
|                                            | THF                              | 23.9 ± 0.9 | 20.7 | 40.6  | 18.5  | 18.8  | 36.5          | 31.4          | 29.7            | 21.6  | 18.6   | 32.6           | 30.5             | 20.8  | 17.3  | 20.0 | 33.8 |  |  |
| CpRu(CO)(Cl)L                              | η <sup>2</sup> -cyclopentene     | 18.8 ± 1.1 | 16.5 | 44.3  | 7.4   | 8.3   | 24.0          | 18.6          | 21.1            | 16.3  | 13.5   | 24.9           | 27.1             | 14.5  | 10.8  | 13.3 | 30.6 |  |  |
|                                            | η <sup>2</sup> -cyclohexene      | 17.2 ± 1.4 | 12.3 | 41.1  | 3.8   | 4.8   | 20.4          | 15.6          | 18.1            | 12.4  | 9.4    | 21.6           | 23.7             | 10.8  | 6.8   | 9.6  | 26.1 |  |  |
|                                            | η <sup>2</sup> -cyclooctene      | 21.0 ± 0.6 | 16.3 | 39.4  | 7.5   | 8.4   | 24.0          | 19.4          | 21.7            | 16.3  | 13.4   | 25.6           | 27.6             | 14.5  | 10.8  | 13.4 | 30.6 |  |  |
| (μ-pdt)Fe <sub>2</sub> (CO) <sub>5</sub> L | THF                              | 13.7 ± 0.3 | 9.5  | 32.0  | 7.1   | 7.1   | 21.1          | 18.9          | 19.9            | 10.1  | 7.4    | 20.3           | 21.0             | 9.7   | 6.1   | 9.0  | 22.4 |  |  |
|                                            | η <sup>2</sup> -3-hexyne         | 20.9 ± 0.4 | 15.2 | 35.1  | 5.8   | 7.5   | 22.5          | 20.1          | 20.8            | 15.6  | 12.1   | 26.3           | 26.7             | 14.1  | 9.2   | 12.4 | 27.3 |  |  |
|                                            | η <sup>2</sup> -cyclohexene      | 19.7 ± 0.6 | 13.4 | 38.0  | 4.1   | 5.6   | 22.4          | 18.4          | 17.8            | 13.7  | 10.4   | 24.6           | 23.7             | 11.9  | 7.3   | 10.2 | 25.8 |  |  |
|                                            | η <sup>2</sup> -2,3-dihydrofuran | 20.9 ± 1.6 | 15.5 | 38.0  | 6.7   | 8.3   | 22.4          | 19.2          | 18.8            | 16.0  | 12.9   | 25.0           | 24.3             | 14.0  | 9.8   | 12.5 | 26.9 |  |  |
|                                            | MUE                              | 4.5        | 13.4 | 11.6  | 10.2  | 3.4   | 2.2           | 2.5           | 4.0             | 6.8   | 4.5    | 5.9            | 5.8              | 9.2   | 7.0   | 5.7  |      |  |  |
|                                            | MSE                              | -4.5       | 13.4 | -11.6 | -10.2 | 3.0   | -0.1          | 1.6           | -4.0            | -6.8  | 4.5    | 5.9            | -5.8             | -9.2  | -7.0  | 5.7  |      |  |  |
|                                            | RMSD                             | 4.9        | 14.2 | 12.2  | 10.7  | 4.2   | 2.8           | 3.0           | 4.4             | 7.1   | 4.9    | 6.2            | 6.2              | 9.5   | 7.4   | 6.4  |      |  |  |
|                                            | MAXD                             | 8.6        | 25.5 | 19.3  | 16.9  | 12.6  | 7.5           | 6.2           | 8.0             | 11.1  | 8.7    | 9.4            | 11.2             | 14.5  | 12.8  | 11.8 |      |  |  |

| Complex                                    | Ligand L                         | Expt.      | HGGA    |         |         |          |         |       |         |             |               |          |          |       |  |
|--------------------------------------------|----------------------------------|------------|---------|---------|---------|----------|---------|-------|---------|-------------|---------------|----------|----------|-------|--|
|                                            |                                  |            | BH&HLYP | MPW1LYP | MPW1PBE | MPW1PW91 | MPW3PBE | O3LYP | PBE1PBE | PBE1PBE-GD3 | PBE1PBE-GD3BJ | PBEH1PBE | SOGGA11X | X3LYP |  |
| CpMn(CO) <sub>2</sub> L                    | η <sup>2</sup> -2,3-dihydrofuran | 28.4 ± 1.0 | 11.1    | 17.4    | 25.3    | 24.6     | 25.8    | 15.8  | 27.2    | 33.2        | 33.5          | 27.0     | 18.9     | 18.7  |  |
|                                            | chloropropane                    | 16.0 ± 0.6 | 9.6     | 12.5    | 14.7    | 14.5     | 15.2    | 8.0   | 16.0    | 19.8        | 20.2          | 16.2     | 11.8     | 12.9  |  |
|                                            | η <sup>2</sup> -cycloheptene     | 28.5 ± 0.8 | 7.9     | 14.0    | 21.8    | 21.2     | 22.4    | 11.3  | 23.9    | 30.9        | 31.3          | 23.7     | 15.8     | 15.3  |  |
|                                            | η <sup>2</sup> -cyclooctene      | 34.9 ± 0.7 | 11.8    | 17.8    | 26.0    | 25.4     | 26.5    | 15.9  | 28.0    | 34.9        | 35.1          | 27.8     | 19.7     | 19.1  |  |
|                                            | η <sup>2</sup> -furan            | 21.9 ± 1.0 | 6.0     | 10.9    | 17.4    | 16.8     | 17.8    | 8.5   | 19.0    | 24.2        | 24.9          | 18.9     | 12.1     | 11.9  |  |
|                                            | S( <i>n</i> -Bu) <sub>2</sub>    | 36.0 ± 1.0 | 19.8    | 24.7    | 29.7    | 29.3     | 30.4    | 21.5  | 31.4    | 37.8        | 38.5          | 31.4     | 24.6     | 25.5  |  |
|                                            | tetrahydrothiophene              | 37.0       | 20.4    | 25.6    | 30.7    | 30.3     | 31.4    | 23.2  | 32.2    | 37.4        | 38.3          | 32.2     | 25.3     | 26.5  |  |
|                                            | THF                              | 24.0 ± 3.0 | 15.8    | 17.2    | 17.1    | 17.1     | 17.6    | 9.1   | 18.7    | 27.3        | 27.1          | 19.1     | 19.6     | 17.1  |  |
|                                            | thiophene                        | 19.5       | 11.1    | 14.8    | 18.7    | 18.4     | 19.2    | 11.3  | 20.1    | 24.8        | 26.0          | 20.2     | 14.7     | 15.4  |  |
|                                            | toluene                          | 14.2 ± 0.8 | 0.3     | 4.1     | 9.1     | 8.7      | 9.5     | -0.4  | 10.9    | 17.7        | 18.3          | 11.0     | 4.8      | 4.8   |  |
| BzCr(CO) <sub>2</sub> L                    | TES                              | 27.4 ± 0.8 | 5.8     | 13.6    | 23.0    | 22.3     | 23.6    | 12.6  | 25.4    | 33.1        | 34.2          | 25.2     | 15.9     | 15.1  |  |
|                                            | η <sup>2</sup> -2,3-dihydrofuran | 21.0 ± 1.0 | 8.5     | 11.9    | 18.5    | 18.0     | 18.7    | 7.8   | 20.5    | 26.3        | 27.3          | 20.3     | 14.1     | 12.7  |  |
|                                            | η <sup>2</sup> -3-hexyne         | 22.8 ± 0.4 | 9.0     | 12.4    | 18.8    | 18.3     | 19.0    | 8.1   | 20.9    | 27.8        | 29.4          | 20.7     | 14.3     | 13.1  |  |
|                                            | η <sup>2</sup> -benzene          | 11.5 ± 0.9 | -0.1    | 1.6     | 4.6     | 4.4      | 4.7     | -4.5  | 6.2     | 12.0        | 13.4          | 6.4      | 2.3      | 1.7   |  |
|                                            | TES                              | 24.3 ± 1.2 | 6.3     | 9.9     | 17.7    | 17.1     | 17.8    | 6.0   | 20.0    | 27.7        | 29.3          | 19.8     | 13.1     | 10.8  |  |
| Cr(CO) <sub>5</sub> L                      | THF                              | 21.4 ± 0.8 | 11.2    | 13.0    | 13.1    | 13.1     | 13.6    | 5.2   | 14.8    | 23.4        | 23.7          | 15.2     | 15.5     | 12.9  |  |
|                                            | η <sup>2</sup> -benzene          | 11.4 ± 1.1 | 3.9     | 5.0     | 8.0     | 7.8      | 8.0     | -0.9  | 9.6     | 15.5        | 17.2          | 9.8      | 6.4      | 5.0   |  |
|                                            | η <sup>2</sup> -3-hexyne         | 18.3 ± 0.7 | 7.8     | 10.1    | 16.0    | 15.5     | 15.9    | 4.4   | 18.1    | 24.1        | 25.1          | 18.0     | 13.0     | 10.4  |  |
| CpRe(CO) <sub>2</sub> L                    | heptane                          | 13.7 ± 0.2 | 8.7     | 8.8     | 11.7    | 11.5     | 11.5    | 3.6   | 12.8    | 17.0        | 17.2          | 12.9     | 10.1     | 8.8   |  |
| (DMP)Mn(CO) <sub>2</sub> L                 | THF                              | 22.1 ± 0.5 | 15.0    | 17.3    | 17.3    | 17.3     | 17.9    | 9.8   | 18.9    | 27.5        | 27.3          | 19.3     | 19.3     | 17.3  |  |
|                                            | η <sup>2</sup> -benzene          | 14.9 ± 1.4 | 2.3     | 6.7     | 11.7    | 11.4     | 12.4    | 3.0   | 13.5    | 19.9        | 20.5          | 13.6     | 7.2      | 7.6   |  |
|                                            | bromohexane                      | 21.1 ± 0.4 | 9.1     | 12.7    | 16.1    | 15.8     | 16.7    | 9.5   | 17.4    | 21.7        | 22.3          | 17.5     | 12.1     | 13.3  |  |
| TpRe(CO) <sub>2</sub> L                    | THF                              | 23.9 ± 0.9 | 20.6    | 20.6    | 20.5    | 20.5     | 20.6    | 11.0  | 22.2    | 32.0        | 30.9          | 22.8     | 24.4     | 20.2  |  |
| CpRu(CO)(Cl)L                              | η <sup>2</sup> -cyclopentene     | 18.8 ± 1.1 | 10.0    | 9.6     | 16.8    | 16.3     | 16.0    | 3.8   | 18.6    | 24.9        | 25.8          | 18.2     | 13.7     | 9.8   |  |
|                                            | η <sup>2</sup> -cyclohexene      | 17.2 ± 1.4 | 6.1     | 6.0     | 12.6    | 12.1     | 12.0    | -0.5  | 14.4    | 21.1        | 22.0          | 14.1     | 9.8      | 6.3   |  |
|                                            | η <sup>2</sup> -cyclooctene      | 21.0 ± 0.6 | 10.3    | 9.7     | 16.7    | 16.2     | 15.9    | 3.4   | 18.4    | 25.4        | 26.2          | 18.2     | 14.1     | 9.9   |  |
|                                            | THF                              | 13.7 ± 0.3 | 10.4    | 9.0     | 9.5     | 9.5      | 9.3     | -0.3  | 11.0    | 19.8        | 20.0          | 11.4     | 13.5     | 8.5   |  |
| (μ-pdt)Fe <sub>2</sub> (CO) <sub>5</sub> L | η <sup>2</sup> -3-hexyne         | 20.9 ± 0.4 | 4.5     | 8.4     | 15.0    | 14.5     | 15.1    | 2.5   | 17.3    | 25.5        | 25.6          | 17.2     | 11.1     | 9.0   |  |
|                                            | η <sup>2</sup> -cyclohexene      | 19.7 ± 0.6 | 3.5     | 6.6     | 13.3    | 12.8     | 13.2    | 0.4   | 15.5    | 23.7        | 23.0          | 15.4     | 9.8      | 7.1   |  |
|                                            | η <sup>2</sup> -2,3-dihydrofuran | 20.9 ± 1.6 | 5.8     | 9.0     | 15.4    | 14.9     | 15.5    | 3.6   | 17.4    | 24.3        | 23.8          | 17.4     | 11.8     | 9.7   |  |
|                                            | MUE                              | 12.5       | 9.5     | 4.7     | 5.0     | 4.4      | 14.5    | 2.9   | 3.8     | 4.4         | 2.9           | 7.6      | 9.0      |       |  |
|                                            | MSE                              | -12.5      | -9.5    | -4.7    | -5.0    | -4.4     | -14.5   | -2.9  | 3.8     | 4.4         | -2.8          | -7.6     | -9.0     |       |  |
|                                            | RMSD                             | 13.5       | 10.1    | 5.1     | 5.4     | 4.8      | 14.7    | 3.5   | 4.2     | 4.8         | 3.4           | 8.4      | 9.5      |       |  |
|                                            | MAXD                             | 23.1       | 17.1    | 8.9     | 9.5     | 8.4      | 19.3    | 6.9   | 8.1     | 7.0         | 7.1           | 15.2     | 15.8     |       |  |

| Complex                                    | Ligand L                      | Expt                       | MGGA       |       |       |        |            |             |             |       |              |      |                  |                  |                    |      |      |
|--------------------------------------------|-------------------------------|----------------------------|------------|-------|-------|--------|------------|-------------|-------------|-------|--------------|------|------------------|------------------|--------------------|------|------|
|                                            |                               |                            | BB95       | M06-L | M11-L | MN12-L | MPW<br>B95 | MPW<br>KCIS | PBE<br>KCIS | tHCTH | TPSS<br>KCIS | TPSS | TPSSTPSS-<br>GD2 | TPSSTPSS-<br>GD3 | TPSSTPSS-<br>GD3BJ | VSXC |      |
| CpMn(CO) <sub>2</sub> L                    | $\eta^2$ -2,3-dihydrofuran    | 28.4 ± 1.0                 | 29.7       | 29.6  | 20.2  | 29.1   | 32.7       | 25.7        | 28.2        | 20.9  | 26.3         | 28.9 | 42.3             | 36.8             | 37.5               | 48.8 |      |
|                                            | chloropropane                 | 16.0 ± 0.6                 | 16.5       | 17.2  | 13.1  | 16.8   | 18.7       | 15.0        | 16.6        | 12.2  | 15.8         | 17.0 | 22.8             | 22.1             | 22.7               | 29.3 |      |
|                                            | $\eta^2$ -cycloheptene        | 28.5 ± 0.8                 | 26.5       | 26.9  | 17.6  | 26.8   | 29.6       | 21.9        | 24.5        | 16.9  | 23.0         | 25.6 | 41.0             | 35.0             | 35.6               | 49.0 |      |
|                                            | $\eta^2$ -cyclooctene         | 34.9 ± 0.7                 | 30.1       | 30.4  | 21.5  | 30.4   | 33.0       | 25.9        | 28.4        | 21.0  | 26.8         | 29.5 | 44.2             | 38.5             | 39.1               | 50.1 |      |
|                                            | $\eta^2$ -furan               | 21.9 ± 1.0                 | 20.6       | 20.5  | 12.8  | 20.3   | 23.2       | 17.4        | 19.5        | 13.4  | 18.3         | 20.6 | 32.3             | 27.5             | 28.7               | 34.9 |      |
|                                            | S( <i>n</i> -Bu) <sub>2</sub> | 36.0 ± 1.0                 | 32.5       | 32.8  | 25.1  | 32.4   | 35.2       | 30.6        | 32.7        | 26.6  | 30.8         | 32.5 | 42.7             | 40.8             | 42.1               | 50.6 |      |
|                                            | tetrahydrothiophene           | 37.0                       | 33.4       | 32.7  | 25.0  | 31.8   | 35.9       | 32.0        | 33.9        | 28.3  | 31.9         | 33.5 | 41.7             | 40.4             | 41.8               | 46.1 |      |
|                                            | THF                           | 24.0 ± 3.0                 | 17.4       | 22.1  | 22.9  | 25.6   | 19.9       | 15.8        | 17.7        | 13.1  | 17.5         | 18.7 | 31.2             | 28.9             | 28.7               | 41.0 |      |
|                                            | thiophene                     | 19.5                       | 20.2       | 20.2  | 13.5  | 19.7   | 22.5       | 18.9        | 20.6        | 15.9  | 19.5         | 21.0 | 28.4             | 27.3             | 29.0               | 30.8 |      |
|                                            | toluene                       | 14.2 ± 0.8                 | 12.6       | 14.8  | 8.4   | 14.5   | 15.5       | 9.1         | 11.5        | 5.0   | 10.1         | 12.1 | 25.9             | 21.1             | 22.0               | 36.4 |      |
|                                            | TES                           | 27.4 ± 0.8                 | 28.5       | 26.4  | 12.6  | 27.9   | 31.7       | 25.2        | 28.2        | 18.1  | 23.7         | 25.4 | 40.0             | 35.6             | 37.4               | 54.5 |      |
|                                            | BzCr(CO) <sub>2</sub> L       | $\eta^2$ -2,3-dihydrofuran | 21.0 ± 1.0 | 22.0  | 23.1  | 15.5   | 21.8       | 25.1        | 17.5        | 20.0  | 12.5         | 18.6 | 21.0             | 34.9             | 28.8               | 30.3 | 45.4 |
|                                            |                               | $\eta^2$ -3-hexyne         | 22.8 ± 0.4 | 21.7  | 23.0  | 16.3   | 21.3       | 25.0        | 17.7        | 20.4  | 13.4         | 18.9 | 21.3             | 35.1             | 30.7               | 32.8 | 48.2 |
| $\eta^2$ -benzene                          |                               | 11.5 ± 0.9                 | 6.9        | 10.6  | 6.4   | 10.7   | 9.5        | 3.6         | 5.7         | 0.4   | 4.9          | 6.4  | 18.5             | 14.2             | 16.1               | 32.3 |      |
| TES                                        |                               | 24.3 ± 1.2                 | 21.3       | 21.5  | 10.6  | 22.5   | 24.6       | 17.5        | 20.4        | 10.6  | 17.0         | 18.8 | 33.4             | 29.0             | 31.4               | 53.7 |      |
| THF                                        |                               | 21.4 ± 0.8                 | 14.8       | 19.4  | 19.1  | 22.0   | 17.5       | 12.6        | 14.7        | 9.6   | 14.2         | 15.3 | 28.6             | 25.3             | 26.0               | 41.0 |      |
| Cr(CO) <sub>5</sub> L                      | $\eta^2$ -benzene             | 11.4 ± 1.1                 | 9.3        | 13.3  | 9.5   | 13.9   | 11.9       | 6.0         | 8.1         | 3.3   | 7.6          | 9.1  | 20.0             | 16.8             | 19.4               | 33.7 |      |
|                                            | $\eta^2$ -3-hexyne            | 18.3 ± 0.7                 | 17.5       | 19.8  | 13.3  | 19.0   | 20.8       | 13.2        | 15.9        | 8.7   | 15.1         | 17.4 | 29.8             | 25.4             | 26.9               | 42.8 |      |
| CpRe(CO) <sub>2</sub> L                    | heptane                       | 13.7 ± 0.2                 | 10.0       | 11.7  | 9.3   | 13.0   | 11.9       | 9.0         | 10.4        | 7.2   | 9.8          | 11.1 | 19.1             | 16.5             | 16.9               | 21.7 |      |
| (DMP)Mn(CO) <sub>2</sub> L                 | THF                           | 22.1 ± 0.5                 | 18.6       | 22.2  | 22.7  | 25.1   | 21.2       | 17.0        | 19.0        | 14.2  | 18.6         | 19.7 | 32.3             | 29.9             | 29.7               | 40.7 |      |
|                                            | $\eta^2$ -benzene             | 14.9 ± 1.4                 | 16.8       | 17.4  | 9.8   | 16.3   | 19.5       | 13.1        | 15.4        | 9.4   | 13.7         | 15.6 | 28.9             | 23.9             | 25.0               | 38.3 |      |
|                                            | bromohexane                   | 21.1 ± 0.4                 | 18.9       | 18.8  | 12.1  | 17.6   | 21.1       | 17.2        | 18.9        | 14.3  | 17.8         | 19.1 | 25.7             | 24.8             | 25.6               | 31.2 |      |
| TpRe(CO) <sub>2</sub> L                    | THF                           | 23.9 ± 0.9                 | 19.5       | 26.8  | 27.9  | 30.9   | 22.3       | 17.5        | 19.7        | 15.6  | 20.0         | 21.2 | 38.4             | 32.8             | 31.3               | 50.2 |      |
| CpRu(CO)(Cl)L                              | $\eta^2$ -cyclopentene        | 18.8 ± 1.1                 | 14.8       | 17.9  | 17.4  | 24.7   | 17.7       | 10.8        | 13.0        | 7.8   | 13.1         | 16.0 | 31.0             | 24.4             | 26.0               | 39.2 |      |
|                                            | $\eta^2$ -cyclohexene         | 17.2 ± 1.4                 | 10.9       | 14.2  | 13.0  | 20.4   | 13.9       | 7.3         | 9.6         | 4.4   | 9.6          | 12.3 | 27.2             | 21.3             | 22.8               | 35.0 |      |
|                                            | $\eta^2$ -cyclooctene         | 21.0 ± 0.6                 | 14.1       | 18.0  | 16.9  | 24.2   | 17.1       | 10.6        | 12.8        | 7.9   | 13.1         | 15.9 | 30.8             | 25.0             | 26.4               | 37.8 |      |
|                                            | THF                           | 13.7 ± 0.3                 | 7.6        | 14.4  | 18.8  | 23.6   | 10.2       | 5.2         | 7.1         | 3.8   | 8.4          | 9.9  | 23.6             | 20.3             | 20.8               | 35.7 |      |
| (μ-pdt)Fe <sub>2</sub> (CO) <sub>5</sub> L | $\eta^2$ -3-hexyne            | 20.9 ± 0.4                 | 16.5       | 20.5  | 13.9  | 22.9   | 20.0       | 12.1        | 15.0        | 7.4   | 14.3         | 16.9 | 31.3             | 27.7             | 28.0               | 47.1 |      |
|                                            | $\eta^2$ -cyclohexene         | 19.7 ± 0.6                 | 15.1       | 20.3  | 12.2  | 22.4   | 18.4       | 10.0        | 12.7        | 5.0   | 12.5         | 15.3 | 31.3             | 26.0             | 25.4               | 47.4 |      |
|                                            | $\eta^2$ -2,3-dihydrofuran    | 20.9 ± 1.6                 | 17.8       | 21.9  | 13.7  | 23.7   | 20.9       | 13.1        | 15.6        | 8.5   | 15.3         | 17.9 | 31.4             | 27.0             | 26.6               | 44.2 |      |
|                                            | MUE                           | 3.3                        | 1.7        | 6.5   | 2.5   | 2.1    | 5.9        | 3.9         | 9.7         | 4.7   | 3.0          | 9.9  | 5.9              | 6.9              | 19.7               |      |      |
|                                            | MSE                           | -2.8                       | -0.6       | -5.8  | 0.8   | 0.0    | -5.9       | -3.7        | -9.7        | -4.7  | -2.7         | 9.9  | 5.9              | 6.9              | 19.7               |      |      |
|                                            | RMSD                          | 3.8                        | 2.1        | 7.5   | 3.3   | 2.6    | 6.5        | 4.5         | 10.1        | 5.1   | 3.4          | 10.3 | 6.2              | 7.1              | 20.5               |      |      |
|                                            | MAXD                          | 6.9                        | 4.5        | 14.8  | 9.9   | 4.6    | 10.4       | 8.2         | 14.7        | 8.1   | 6.1          | 14.5 | 9.0              | 10.1             | 29.4               |      |      |

| Complex                                    | Ligand L                      | Expt                       | HMGGA      |      |         |           |      |        |      |        |        |       |
|--------------------------------------------|-------------------------------|----------------------------|------------|------|---------|-----------|------|--------|------|--------|--------|-------|
|                                            |                               |                            | B1B95      | BMK  | BMK-GD3 | BMK-GD3BJ | M05  | M05-2X | M06  | M06-2X | M06-HF | TPSSh |
| CpMn(CO) <sub>2</sub> L                    | $\eta^2$ -2,3-dihydrofuran    | 28.4 ± 1.0                 | 26.0       | 22.9 | 32.8    | 32.0      | 24.0 | 26.1   | 30.9 | 22.3   | 22.0   | 27.2  |
|                                            | chloropropane                 | 16.0 ± 0.6                 | 14.8       | 13.5 | 19.3    | 20.0      | 12.4 | 17.4   | 17.8 | 15.8   | 17.2   | 16.1  |
|                                            | $\eta^2$ -cycloheptene        | 28.5 ± 0.8                 | 23.1       | 20.2 | 31.2    | 30.6      | 20.2 | 23.9   | 27.7 | 20.4   | 20.9   | 24.0  |
|                                            | $\eta^2$ -cyclooctene         | 34.9 ± 0.7                 | 26.9       | 24.1 | 34.6    | 34.1      | 24.5 | 27.6   | 31.8 | 23.8   | 24.2   | 28.0  |
|                                            | $\eta^2$ -furan               | 21.9 ± 1.0                 | 17.7       | 14.9 | 23.4    | 23.5      | 15.2 | 18.8   | 22.1 | 15.4   | 16.5   | 19.2  |
|                                            | S( <i>n</i> -Bu) <sub>2</sub> | 36.0 ± 1.0                 | 29.4       | 26.6 | 36.1    | 37.4      | 26.6 | 30.8   | 34.1 | 27.1   | 28.3   | 31.1  |
|                                            | tetrahydrothiophene           | 37.0                       | 29.9       | 27.1 | 35.1    | 36.7      | 27.6 | 30.3   | 33.9 | 26.5   | 27.2   | 32.0  |
|                                            | THF                           | 24.0 ± 3.0                 | 17.8       | 18.9 | 30.3    | 29.4      | 15.7 | 24.1   | 22.5 | 23.7   | 25.8   | 18.3  |
|                                            | thiophene                     | 19.5                       | 18.1       | 16.5 | 23.8    | 26.0      | 15.4 | 19.4   | 22.1 | 16.5   | 18.4   | 19.9  |
|                                            | toluene                       | 14.2 ± 0.8                 | 10.3       | 8.1  | 18.4    | 18.8      | 7.2  | 13.8   | 15.8 | 12.0   | 14.3   | 10.8  |
|                                            | TES                           | 27.4 ± 0.8                 | 24.3       | 18.6 | 30.4    | 32.0      | 21.1 | 23.2   | 27.6 | 18.4   | 19.0   | 23.9  |
|                                            | BzCr(CO) <sub>2</sub> L       | $\eta^2$ -2,3-dihydrofuran | 21.0 ± 1.0 | 20.2 | 18.0    | 27.5      | 27.7 | 15.8   | 22.6 | 24.3   | 20.1   | 22.8  |
| $\eta^2$ -3-hexyne                         |                               | 22.8 ± 0.4                 | 20.1       | 19.0 | 29.4    | 31.1      | 15.8 | 24.3   | 24.1 | 21.3   | 26.2   | 20.2  |
| $\eta^2$ -benzene                          |                               | 11.5 ± 0.9                 | 6.4        | 4.9  | 13.6    | 15.4      | 3.0  | 10.9   | 10.4 | 10.3   | 13.3   | 5.7   |
| TES                                        |                               | 24.3 ± 1.2                 | 19.8       | 16.7 | 28.5    | 30.8      | 13.9 | 21.8   | 23.0 | 18.7   | 23.0   | 17.9  |
| THF                                        |                               | 21.4 ± 0.8                 | 14.4       | 14.8 | 26.0    | 25.9      | 12.2 | 20.1   | 18.9 | 20.1   | 21.5   | 14.7  |
| Cr(CO) <sub>5</sub> L                      | $\eta^2$ -benzene             | 11.4 ± 1.1                 | 9.9        | 8.7  | 17.7    | 20.1      | 7.3  | 14.6   | 13.1 | 14.0   | 17.4   | 8.8   |
|                                            | $\eta^2$ -3-hexyne            | 18.3 ± 0.7                 | 17.9       | 17.9 | 26.7    | 27.4      | 14.1 | 22.6   | 20.8 | 20.4   | 25.4   | 16.9  |
| CpRe(CO) <sub>2</sub> L                    | heptane                       | 13.7 ± 0.2                 | 11.6       | 10.8 | 16.7    | 17.4      | 7.6  | 15.4   | 13.6 | 13.7   | 17.6   | 11.3  |
| (DMP)Mn(CO) <sub>2</sub> L                 | THF                           | 22.1 ± 0.5                 | 17.8       | 18.6 | 29.8    | 29.1      | 16.0 | 23.4   | 22.2 | 23.1   | 24.3   | 19.0  |
|                                            | $\eta^2$ -benzene             | 14.9 ± 1.4                 | 13.1       | 10.4 | 20.0    | 20.5      | 10.3 | 15.1   | 17.3 | 13.5   | 15.1   | 13.8  |
|                                            | bromohexane                   | 21.1 ± 0.4                 | 16.1       | 13.9 | 20.7    | 22.1      | 14.0 | 17.5   | 19.8 | 15.7   | 16.8   | 17.7  |
| TpRe(CO) <sub>2</sub> L                    | THF                           | 23.9 ± 0.9                 | 21.7       | 23.4 | 35.6    | 33.1      | 20.2 | 29.5   | 27.3 | 29.0   | 32.1   | 21.4  |
| CpRu(CO)(Cl)L                              | $\eta^2$ -cyclopentene        | 18.8 ± 1.1                 | 18.0       | 15.4 | 26.0    | 26.5      | 11.1 | 23.0   | 19.9 | 19.2   | 28.5   | 16.6  |
|                                            | $\eta^2$ -cyclohexene         | 17.2 ± 1.4                 | 13.4       | 11.9 | 23.1    | 23.5      | 6.9  | 18.8   | 15.9 | 15.0   | 24.1   | 12.7  |
|                                            | $\eta^2$ -cyclooctene         | 21.0 ± 0.6                 | 17.4       | 15.8 | 26.8    | 27.3      | 11.1 | 23.0   | 20.2 | 19.3   | 28.9   | 16.5  |
|                                            | THF                           | 13.7 ± 0.3                 | 10.8       | 13.8 | 26.2    | 25.5      | 7.0  | 19.1   | 13.5 | 17.8   | 24.4   | 10.5  |
| (μ-pdt)Fe <sub>2</sub> (CO) <sub>5</sub> L | $\eta^2$ -3-hexyne            | 20.9 ± 0.4                 | 16.6       | 16.2 | 28.1    | 27.0      | 12.0 | 20.4   | 21.5 | 17.7   | 18.3   | 16.4  |
|                                            | $\eta^2$ -cyclohexene         | 19.7 ± 0.6                 | 15.5       | 14.4 | 26.8    | 24.1      | 10.8 | 18.6   | 21.2 | 16.8   | 17.9   | 14.9  |
|                                            | $\eta^2$ -2,3-dihydrofuran    | 20.9 ± 1.6                 | 17.3       | 15.8 | 26.6    | 24.0      | 12.7 | 19.5   | 22.3 | 17.8   | 18.7   | 17.2  |
|                                            | MUE                           | 3.7                        | 5.2        | 5.0  | 5.2     | 7.2       | 2.6  | 1.6    | 3.7  | 4.7    | 3.5    |       |
|                                            | MSE                           | -3.7                       | -5.1       | 4.8  | 5.1     | -7.2      | -0.4 | 0.3    | -2.7 | 0.1    | -3.5   |       |
|                                            | RMSD                          | 4.2                        | 5.8        | 5.8  | 5.9     | 7.5       | 3.3  | 1.9    | 4.9  | 5.8    | 3.9    |       |
|                                            | MAXD                          | 8.0                        | 10.8       | 12.5 | 11.8    | 10.4      | 7.3  | 3.4    | 11.1 | 10.7   | 6.9    |       |

| Complex                 | Ligand L                                         | Expt                       | RS-HGGA    |               |                 |           |          |           |                  |                      |                        |      |        |       |              |               |                |      |
|-------------------------|--------------------------------------------------|----------------------------|------------|---------------|-----------------|-----------|----------|-----------|------------------|----------------------|------------------------|------|--------|-------|--------------|---------------|----------------|------|
|                         |                                                  |                            | CAM-B3LYP  | CAM-B3LYP-GD3 | CAM-B3LYP-GD3BJ | HISSb PBE | HSE2 PBE | HSEH1 PBE | LC- $\omega$ PBE | LC- $\omega$ PBE-GD3 | LC- $\omega$ PBE-GD3BJ | M11  | MN12SX | N12SX | $\omega$ B97 | $\omega$ B97X | $\omega$ B97XD |      |
| CpMn(CO) <sub>2</sub> L | $\eta^2$ -2,3-dihydrofuran                       | 28.4 ± 1.0                 | 20.7       | 27.4          | 27.0            | 24.6      | 26.8     | 27.0      | 27.4             | 34.4                 | 34.5                   | 25.8 | 23.3   | 26.7  | 25.7         | 24.1          | 28.0           |      |
|                         | chloropropane                                    | 16.0 ± 0.6                 | 14.0       | 18.1          | 18.4            | 14.9      | 16.2     | 16.2      | 15.1             | 19.5                 | 20.0                   | 15.4 | 13.9   | 15.1  | 16.0         | 15.5          | 16.6           |      |
|                         | $\eta^2$ -cycloheptene                           | 28.5 ± 0.8                 | 17.4       | 25.1          | 24.8            | 21.3      | 23.5     | 23.7      | 24.1             | 32.3                 | 32.4                   | 23.9 | 20.8   | 23.6  | 22.9         | 21.3          | 26.4           |      |
|                         | $\eta^2$ -cyclooctene                            | 34.9 ± 0.7                 | 21.3       | 28.8          | 28.5            | 25.6      | 27.6     | 27.8      | 28.5             | 36.4                 | 36.4                   | 27.1 | 24.6   | 27.6  | 26.9         | 25.2          | 30.1           |      |
|                         | $\eta^2$ -furan                                  | 21.9 ± 1.0                 | 13.5       | 19.3          | 19.4            | 17.0      | 18.7     | 18.9      | 18.9             | 25.0                 | 25.5                   | 17.0 | 15.5   | 18.6  | 17.4         | 16.3          | 19.7           |      |
|                         | S( <i>n</i> -Bu) <sub>2</sub>                    | 36.0 ± 1.0                 | 26.9       | 33.9          | 34.4            | 29.5      | 31.4     | 31.5      | 30.9             | 38.3                 | 39.1                   | 29.3 | 27.7   | 30.6  | 30.4         | 29.5          | 33.0           |      |
|                         | tetrahydrothiophene                              | 37.0                       | 27.8       | 33.4          | 34.1            | 30.2      | 32.2     | 32.3      | 31.6             | 37.6                 | 38.6                   | 28.5 | 27.4   | 31.5  | 30.8         | 30.0          | 32.6           |      |
|                         | THF                                              | 24.0 ± 3.0                 | 19.3       | 28.3          | 27.7            | 22.6      | 19.2     | 19.2      | 19.0             | 28.5                 | 28.1                   | 26.3 | 23.4   | 21.8  | 22.1         | 21.1          | 23.1           |      |
|                         | thiophene                                        | 19.5                       | 16.8       | 21.9          | 23.1            | 18.8      | 20.1     | 20.2      | 20.0             | 25.4                 | 26.9                   | 17.0 | 16.2   | 19.3  | 19.7         | 19.0          | 20.9           |      |
|                         | toluene                                          | 14.2 ± 0.8                 | 6.3        | 13.7          | 13.8            | 9.7       | 10.9     | 11.0      | 10.4             | 18.3                 | 18.8                   | 12.1 | 10.1   | 10.2  | 11.0         | 9.7           | 14.3           |      |
|                         | TES                                              | 27.4 ± 0.8                 | 17.4       | 25.8          | 26.5            | 21.4      | 24.7     | 25.0      | 26.2             | 35.2                 | 36.3                   | 26.1 | 20.1   | 25.0  | 25.5         | 23.1          | 27.9           |      |
|                         | BzCr(CO) <sub>2</sub> L                          | $\eta^2$ -2,3-dihydrofuran | 21.0 ± 1.0 | 14.3          | 20.9            | 21.1      | 18.7     | 20.1      | 20.3             | 19.0                 | 26.0                   | 26.7 | 20.5   | 17.7  | 20.1         | 17.9          | 17.3           | 21.7 |
|                         |                                                  | $\eta^2$ -3-hexyne         | 22.8 ± 0.4 | 14.8          | 22.3            | 23.4      | 18.7     | 20.5      | 20.6             | 19.3                 | 27.3                   | 29.0 | 21.9   | 18.3  | 20.4         | 18.9          | 18.5           | 24.2 |
| $\eta^2$ -benzene       |                                                  | 11.5 ± 0.9                 | 2.7        | 9.0           | 10.2            | 6.1       | 6.3      | 6.4       | 5.1              | 11.8                 | 13.3                   | 9.7  | 7.6    | 5.5   | 7.3          | 6.3           | 10.2           |      |
| TES                     |                                                  | 24.3 ± 1.2                 | 12.9       | 21.4          | 22.7            | 17.5      | 19.3     | 19.7      | 19.6             | 28.5                 | 30.3                   | 22.4 | 16.5   | 19.7  | 19.2         | 18.1          | 23.7           |      |
| THF                     |                                                  | 21.4 ± 0.8                 | 14.6       | 23.6          | 23.5            | 18.3      | 15.2     | 15.2      | 14.4             | 23.9                 | 24.1                   | 22.8 | 19.9   | 17.7  | 17.8         | 16.8          | 19.0           |      |
| Cr(CO) <sub>3</sub> L   | $\eta^2$ -benzene                                | 11.4 ± 1.1                 | 6.5        | 12.9          | 14.4            | 9.7       | 9.7      | 9.8       | 9.3              | 16.1                 | 18.0                   | 14.1 | 11.2   | 9.0   | 11.6         | 10.5          | 13.3           |      |
|                         | $\eta^2$ -3-hexyne                               | 18.3 ± 0.7                 | 12.9       | 19.3          | 20.0            | 16.9      | 17.7     | 17.9      | 17.7             | 24.5                 | 25.6                   | 20.8 | 16.3   | 17.9  | 18.3         | 17.4          | 20.7           |      |
| CpRe(CO) <sub>2</sub> L | heptane                                          | 13.7 ± 0.2                 | 11.1       | 15.7          | 15.7            | 13.2      | 12.8     | 12.8      | 13.6             | 18.3                 | 18.6                   | 13.5 | 10.7   | 11.6  | 14.2         | 13.6          | 16.3           |      |
|                         | (DMP)Mn(CO) <sub>2</sub> L                       | THF                        | 22.1 ± 0.5 | 19.2          | 28.2            | 27.6      | 22.2     | 19.4      | 19.4             | 19.0                 | 28.5                   | 28.2 | 25.7   | 23.0  | 21.5         | 22.1          | 21.0           | 22.9 |
| TpRe(CO) <sub>2</sub> L | $\eta^2$ -benzene                                | 14.9 ± 1.4                 | 8.9        | 15.8          | 16.1            | 12.0      | 13.5     | 13.6      | 13.0             | 20.4                 | 21.0                   | 14.4 | 11.6   | 12.8  | 13.7         | 12.2          | 16.5           |      |
|                         | bromohexane                                      | 21.1 ± 0.4                 | 14.2       | 19.0          | 19.4            | 15.9      | 17.5     | 17.6      | 16.7             | 21.8                 | 22.4                   | 15.3 | 13.9   | 16.4  | 16.7         | 16.1          | 17.9           |      |
|                         | THF                                              | 23.9 ± 0.9                 | 23.1       | 33.2          | 31.8            | 27.4      | 22.8     | 22.8      | 23.3             | 34.0                 | 32.7                   | 32.2 | 28.5   | 25.3  | 28.3         | 26.7          | 30.3           |      |
| CpRu(CO)(Cl)L           | $\eta^2$ -cyclopentene                           | 18.8 ± 1.1                 | 13.3       | 20.5          | 20.7            | 19.2      | 17.9     | 18.1      | 20.0             | 27.6                 | 28.2                   | 22.4 | 20.8   | 18.5  | 18.4         | 17.5          | 21.8           |      |
|                         | $\eta^2$ -cyclohexene                            | 17.2 ± 1.4                 | 9.4        | 17.0          | 17.3            | 14.8      | 13.9     | 14.0      | 15.2             | 23.3                 | 23.9                   | 18.2 | 16.2   | 14.3  | 14.4         | 13.5          | 18.0           |      |
|                         | $\eta^2$ -cyclooctene                            | 21.0 ± 0.6                 | 13.3       | 21.1          | 21.3            | 19.3      | 17.9     | 18.0      | 19.7             | 27.9                 | 28.5                   | 22.0 | 20.4   | 18.3  | 18.7         | 17.7          | 22.1           |      |
|                         | THF                                              | 13.7 ± 0.3                 | 11.9       | 21.3          | 20.9            | 16.6      | 11.3     | 11.3      | 13.5             | 23.5                 | 23.4                   | 23.0 | 20.4   | 14.0  | 16.8         | 15.2          | 15.9           |      |
|                         | ( $\mu$ -pdt)Fe <sub>2</sub> (CO) <sub>5</sub> L | $\eta^2$ -3-hexyne         | 20.9 ± 0.4 | 11.7          | 20.5            | 20.2      | 16.0     | 16.9      | 17.1             | 17.5                 | 26.9                   | 26.8 | 19.5   | 17.4  | 17.7         | 18.3          | 16.9           | 21.6 |
|                         | $\eta^2$ -cyclohexene                            | 19.7 ± 0.6                 | 10.0       | 19.0          | 17.7            | 14.9      | 15.1     | 15.3      | 16.3             | 25.8                 | 24.8                   | 18.2 | 16.1   | 16.1  | 16.7         | 15.1          | 19.9           |      |
|                         | $\eta^2$ -2,3-dihydrofuran                       | 20.9 ± 1.6                 | 12.0       | 19.6          | 18.5            | 16.7      | 17.2     | 17.4      | 17.6             | 25.7                 | 24.8                   | 18.4 | 16.8   | 17.5  | 17.9         | 16.5          | 20.2           |      |
|                         | MUE                                              | 6.9                        | 2.4        | 2.4           | 3.7             | 3.1       | 2.9      | 2.9       | 2.9              | 4.9                  | 5.3                    | 3.1  | 4.3    | 2.9   | 2.9          | 3.8           | 1.8            |      |
|                         | MSE                                              | -6.9                       | 0.3        | 0.5           | -3.2            | -3.0      | -2.9     | -2.8      | -2.8             | 4.9                  | 5.3                    | -0.8 | -3.3   | -2.7  | -2.4         | -3.5          | 0.1            |      |
|                         | RMSD                                             | 7.6                        | 3.3        | 3.1           | 4.3             | 3.6       | 3.4      | 3.5       | 5.5              | 5.8                  | 4.1                    | 5.1  | 3.4    | 3.6   | 4.4          | 2.3           |                |      |
|                         | MAXD                                             | 13.6                       | 9.3        | 7.9           | 9.3             | 7.3       | 7.1      | 7.0       | 10.1             | 9.7                  | 9.3                    | 10.3 | 7.3    | 8.0   | 9.7          | 6.4           |                |      |

| Complex                                    | Ligand L                      | Expt       | Double Hybrids |         |            |              |          |           | Ab initio |      |
|--------------------------------------------|-------------------------------|------------|----------------|---------|------------|--------------|----------|-----------|-----------|------|
|                                            |                               |            | B2PLYP         | B2PLYPD | B2PLYP-GD3 | B2PLYP-GD3BJ | MPW2PLYP | MPW2PLYPD | HF        | MP2  |
| CpMn(CO) <sub>2</sub> L                    | $\eta^2$ -2,3-dihydrofuran    | 28.4 ± 1.0 | 38.0           | 45.5    | 43.3       | 43.6         | 36.4     | 41.8      | -13.6     | 59.5 |
|                                            | chloropropane                 | 16.0 ± 0.6 | 20.7           | 23.8    | 23.9       | 24.4         | 20.4     | 22.7      | -1.6      | 27.3 |
|                                            | $\eta^2$ -cycloheptene        | 28.5 ± 0.8 | 35.0           | 43.4    | 41.0       | 41.3         | 33.4     | 39.6      | -16.9     | 56.9 |
|                                            | $\eta^2$ -cyclooctene         | 34.9 ± 0.7 | 39.3           | 47.3    | 45.1       | 45.4         | 37.6     | 43.5      | -13.0     | 62.2 |
|                                            | $\eta^2$ -furan               | 21.9 ± 1.0 | 28.1           | 34.5    | 32.6       | 33.2         | 26.8     | 31.5      | -13.8     | 45.4 |
|                                            | S( <i>n</i> -Bu) <sub>2</sub> | 36.0 ± 1.0 | 40.3           | 45.9    | 45.6       | 46.6         | 39.2     | 43.3      | 1.7       | 53.4 |
|                                            | tetrahydrothiophene           | 37.0       | 41.3           | 45.8    | 45.6       | 46.7         | 40.0     | 43.3      | 2.1       | 53.6 |
|                                            | THF                           | 24.0 ± 3.0 | 23.7           | 28.6    | 31.6       | 31.5         | 24.1     | 31.4      | 6.9       | 30.4 |
|                                            | thiophene                     | 19.5       | 27.6           | 31.7    | 31.5       | 32.9         | 26.8     | 29.8      | -3.0      | 38.3 |
|                                            | toluene                       | 14.2 ± 0.8 | 18.4           | 26.0    | 24.1       | 24.8         | 17.8     | 23.3      | -15.2     | 31.6 |
| BzCr(CO) <sub>2</sub> L                    | TES                           | 27.4 ± 0.8 | 37.0           | 45.1    | 43.5       | 44.8         | 35.1     | 40.9      | -23.1     | 62.3 |
|                                            | $\eta^2$ -2,3-dihydrofuran    | 21.0 ± 1.0 | 24.9           | 32.5    | 30.0       | 30.8         | 24.6     | 30.1      | -9.1      | 48.1 |
|                                            | $\eta^2$ -3-hexyne            | 22.8 ± 0.4 | 24.2           | 31.9    | 30.0       | 31.5         | 24.2     | 29.7      | -8.2      | 45.8 |
|                                            | $\eta^2$ -benzene             | 11.5 ± 0.9 | 10.5           | 17.2    | 15.3       | 16.7         | 10.7     | 15.5      | -9.8      | 23.2 |
| Cr(CO) <sub>3</sub> L                      | TES                           | 24.3 ± 1.2 | 23.8           | 31.8    | 30.3       | 32.0         | 23.5     | 29.4      | -12.0     | 48.0 |
|                                            | THF                           | 21.4 ± 0.8 | 19.8           | 25.1    | 27.7       | 28.0         | 20.1     | 27.7      | 2.3       | 24.5 |
|                                            | $\eta^2$ -benzene             | 11.4 ± 1.1 | 13.9           | 19.9    | 18.8       | 20.6         | 14.2     | 18.5      | -4.8      | 28.4 |
| CpRe(CO) <sub>2</sub> L                    | $\eta^2$ -3-hexyne            | 18.3 ± 0.7 | 22.3           | 29.1    | 27.2       | 28.1         | 22.5     | 27.4      | -7.4      | 43.4 |
|                                            | heptane                       | 13.7 ± 0.2 | 13.4           | 17.8    | 16.8       | 17.2         | 14.0     | 17.2      | 1.7       | 24.5 |
| (DMP)Mn(CO) <sub>2</sub> L                 | THF                           | 22.1 ± 0.5 | 24.4           | 29.4    | 32.3       | 32.2         | 24.6     | 31.9      | 5.0       | 30.6 |
|                                            | $\eta^2$ -benzene             | 14.9 ± 1.4 | 20.8           | 28.1    | 26.2       | 26.8         | 19.9     | 25.2      | -13.7     | 31.9 |
|                                            | bromohexane                   | 21.1 ± 0.4 | 22.6           | 26.2    | 26.2       | 27.0         | 22.0     | 24.6      | -3.2      | 30.4 |
| TpRe(CO) <sub>2</sub> L                    | THF                           | 23.9 ± 0.9 | 26.6           | 34.1    | 35.2       | 34.1         | 27.6     | 36.7      | 13.2      | 39.6 |
| CpRu(CO)(Cl)L                              | $\eta^2$ -cyclopentene        | 18.8 ± 1.1 | 18.9           | 27.1    | 24.5       | 25.4         | 19.7     | 25.7      | -2.0      | 38.5 |
|                                            | $\eta^2$ -cyclohexene         | 17.2 ± 1.4 | 14.8           | 23.0    | 20.8       | 21.6         | 15.6     | 21.5      | -6.0      | 32.7 |
|                                            | $\eta^2$ -cyclooctene         | 21.0 ± 0.6 | 19.0           | 27.2    | 25.0       | 25.8         | 19.8     | 25.8      | -1.1      | 38.4 |
| (μ-pdt)Fe <sub>2</sub> (CO) <sub>5</sub> L | THF                           | 13.7 ± 0.3 | 12.4           | 18.0    | 20.7       | 20.9         | 13.7     | 21.4      | 6.8       | 19.7 |
|                                            | $\eta^2$ -3-hexyne            | 20.9 ± 0.4 | 26.9           | 34.8    | 33.7       | 33.6         | 26.3     | 32.0      | -17.5     | 46.2 |
|                                            | $\eta^2$ -cyclohexene         | 19.7 ± 0.6 | 24.0           | 32.8    | 30.9       | 30.1         | 23.4     | 29.8      | -15.5     | 39.9 |
|                                            | $\eta^2$ -2,3-dihydrofuran    | 20.9 ± 1.6 | 25.0           | 32.4    | 30.9       | 30.2         | 24.3     | 29.7      | -12.2     | 39.2 |
|                                            | MUE                           |            | 3.7            | 9.7     | 8.8        | 9.4          | 3.1      | 8.2       | 27.6      | 18.3 |
|                                            | MSE                           |            | 3.0            | 9.7     | 8.8        | 9.4          | 2.7      | 8.2       | -27.6     | 18.3 |
|                                            | RMSD                          |            | 4.5            | 10.4    | 9.4        | 9.9          | 3.8      | 8.6       | 29.7      | 19.8 |
|                                            | MAXD                          |            | 9.6            | 17.7    | 16.1       | 17.4         | 8.0      | 13.5      | 50.5      | 34.9 |

Table S9: Solvents used in the experimental study

| Complex                                    | Ligand                                                                                                                                                                                                                                  | Solvent                                                                                                                                                         |
|--------------------------------------------|-----------------------------------------------------------------------------------------------------------------------------------------------------------------------------------------------------------------------------------------|-----------------------------------------------------------------------------------------------------------------------------------------------------------------|
| CpMn(CO) <sub>2</sub> L                    | η <sup>2</sup> -2,3-dihydrofuran<br>chloropropane<br>η <sup>2</sup> -cycloheptene<br>η <sup>2</sup> -cyclooctene<br>η <sup>2</sup> -furan<br>S( <i>n</i> -Bu) <sub>2</sub><br>tetrahydrothiophene<br>THF<br>thiophene<br>toluene<br>TES | cyclohexane<br>dichloromethane<br>methylcyclohexane<br>methylcyclohexane<br>cyclohexane<br>methylcyclohexane<br>heptane<br>THF<br>heptane<br>heptane<br>heptane |
| BzCr(CO) <sub>2</sub> L                    | η <sup>2</sup> -2,3-dihydrofuran<br>η <sup>2</sup> -3-hexyne<br>η <sup>2</sup> -benzene<br>TES<br>THF                                                                                                                                   | cyclohexane<br>heptane<br>benzene<br>heptane<br>THF                                                                                                             |
| Cr(CO) <sub>5</sub> L                      | η <sup>2</sup> -benzene<br>η <sup>2</sup> -3-hexyne                                                                                                                                                                                     | benzene<br>heptane                                                                                                                                              |
| CpRe(CO) <sub>2</sub> L                    | heptane                                                                                                                                                                                                                                 | heptane                                                                                                                                                         |
| (DMP)Mn(CO) <sub>2</sub> L                 | THF<br>η <sup>2</sup> -benzene<br>bromohexane                                                                                                                                                                                           | cyclohexane<br>cyclohexane<br>cyclohexane                                                                                                                       |
| TpRe(CO) <sub>2</sub> L                    | THF                                                                                                                                                                                                                                     | THF                                                                                                                                                             |
| CpRu(CO)(Cl)L                              | η <sup>2</sup> -cyclopentene<br>η <sup>2</sup> -cyclohexene<br>η <sup>2</sup> -cyclooctene<br>THF                                                                                                                                       | THF<br>THF<br>THF<br>THF                                                                                                                                        |
| (μ-pdt)Fe <sub>2</sub> (CO) <sub>5</sub> L | η <sup>2</sup> -3-hexyne<br>η <sup>2</sup> -cyclohexene<br>η <sup>2</sup> -2,3-dihydrofuran                                                                                                                                             | cyclohexane<br>cyclohexane<br>cyclohexane                                                                                                                       |

**Table S10:** Solvent corrected BDEs (kcal/mol) for the top twelve functionals from gas phase calculations.

| Complex                                         | Ligand L                      | Expt                       | Top 12 functionals |      |                |      |               |           |          |        |               |                 |             |       |
|-------------------------------------------------|-------------------------------|----------------------------|--------------------|------|----------------|------|---------------|-----------|----------|--------|---------------|-----------------|-------------|-------|
|                                                 |                               |                            | PW91               |      |                |      | CAM-B3LYP-GD3 |           |          |        | B3LYP-MN12L   |                 |             |       |
|                                                 |                               |                            | M06                | M06L | $\omega$ B97XD | PW91 | MPWB95        | B3LYP-GD3 | BLYP-GD3 | PBEPBE | CAM-B3LYP-GD3 | CAM-B3LYP-GD3BJ | B3LYP-GD3BJ | MN12L |
| CpMn(CO) <sub>2</sub> L                         | $\eta^2$ -2,3-dihydrofuran    | 28.4 ± 1.0                 | 29.6               | 28.0 | 26.6           | 30.8 | 31.3          | 25.7      | 28.7     | 30.4   | 26.0          | 25.6            | 27.3        | 27.4  |
|                                                 | chloropropane                 | 16.0 ± 0.6                 | 12.9               | 11.6 | 11.5           | 14.0 | 13.6          | 12.7      | 14.2     | 13.3   | 13.0          | 13.3            | 14.0        | 10.9  |
|                                                 | $\eta^2$ -cycloheptene        | 28.5 ± 0.8                 | 25.8               | 24.8 | 24.4           | 26.7 | 27.6          | 23.2      | 26.2     | 26.3   | 23.2          | 22.9            | 24.7        | 24.5  |
|                                                 | $\eta^2$ -cyclooctene         | 34.9 ± 0.7                 | 30.0               | 28.3 | 28.2           | 30.6 | 31.1          | 26.7      | 29.5     | 30.2   | 27.0          | 26.6            | 28.1        | 28.2  |
|                                                 | $\eta^2$ -furan               | 21.9 ± 1.0                 | 21.0               | 19.1 | 18.5           | 22.0 | 22.0          | 18.0      | 20.4     | 21.5   | 18.1          | 18.2            | 20.0        | 18.7  |
|                                                 | S( <i>n</i> -Bu) <sub>2</sub> | 36.0 ± 1.0                 | 32.3               | 30.7 | 31.2           | 34.0 | 33.3          | 32.4      | 35.1     | 33.4   | 32.1          | 32.6            | 34.7        | 30.2  |
|                                                 | tetrahydrothiophene           | 37.0                       | 32.2               | 30.7 | 30.8           | 35.1 | 34.0          | 32.0      | 34.6     | 34.5   | 31.7          | 32.4            | 34.4        | 29.7  |
|                                                 | THF                           | 24.0 ± 3.0                 | 22.9               | 21.9 | 22.9           | 20.3 | 20.3          | 23.7      | 24.3     | 19.5   | 24.9          | 24.3            | 23.9        | 21.6  |
|                                                 | thiophene                     | 19.5                       | 20.6               | 18.5 | 19.4           | 22.0 | 21.0          | 20.4      | 22.2     | 21.4   | 20.4          | 21.5            | 23.2        | 18.0  |
|                                                 | toluene                       | 14.2 ± 0.8                 | 14.0               | 12.8 | 12.4           | 13.0 | 13.5          | 12.3      | 14.9     | 12.4   | 11.8          | 12.0            | 14.1        | 12.4  |
|                                                 | TES                           | 27.4 ± 0.8                 | 25.9               | 24.4 | 26.2           | 28.8 | 29.9          | 24.1      | 27.6     | 28.7   | 24.1          | 24.8            | 27.2        | 25.9  |
|                                                 | BzCr(CO) <sub>2</sub> L       | $\eta^2$ -2,3-dihydrofuran | 21.0 ± 1.0         | 23.3 | 22.0           | 20.8 | 22.8          | 24.0      | 19.7     | 21.6   | 22.3          | 20.0            | 20.2        | 22.3  |
| $\eta^2$ -3-hexyne                              |                               | 22.8 ± 0.4                 | 21.7               | 20.4 | 21.8           | 21.9 | 22.5          | 20.1      | 22.6     | 21.2   | 19.9          | 21.0            | 23.6        | 18.7  |
| $\eta^2$ -benzene                               |                               | 11.5 ± 0.9                 | 8.7                | 8.7  | 8.4            | 6.6  | 7.6           | 7.8       | 9.2      | 6.0    | 7.3           | 8.5             | 10.9        | 8.8   |
| TES                                             |                               | 24.3 ± 1.2                 | 21.9               | 20.1 | 22.5           | 21.8 | 23.2          | 20.1      | 22.2     | 21.4   | 20.2          | 21.5            | 24.0        | 21.1  |
| THF                                             |                               | 21.4 ± 0.8                 | 19.6               | 19.6 | 19.3           | 17.2 | 17.8          | 19.7      | 20.5     | 16.4   | 20.6          | 20.5            | 20.9        | 18.8  |
| Cr(CO) <sub>5</sub> L                           | $\eta^2$ -benzene             | 11.4 ± 1.1                 | 12.2               | 12.3 | 12.4           | 10.1 | 11.1          | 12.2      | 12.8     | 9.4    | 12.1          | 13.5            | 16.1        | 12.8  |
|                                                 | $\eta^2$ -3-hexyne            | 18.3 ± 0.7                 | 19.7               | 18.6 | 19.5           | 18.8 | 19.8          | 17.1      | 17.8     | 18.2   | 18.2          | 18.8            | 19.5        | 17.7  |
| CpRe(CO) <sub>2</sub> L                         | heptane                       | 13.7 ± 0.2                 | 9.8                | 7.7  | 12.2           | 9.1  | 8.2           | 10.4      | 9.8      | 8.5    | 11.6          | 11.6            | 11.3        | 8.4   |
| (DMP)Mn(CO) <sub>2</sub> L                      | THF                           | 22.1 ± 0.5                 | 25.0               | 24.7 | 25.2           | 24.0 | 23.8          | 26.4      | 27.6     | 23.2   | 27.3          | 26.8            | 26.7        | 24.1  |
|                                                 | $\eta^2$ -benzene             | 14.9 ± 1.4                 | 15.4               | 15.2 | 14.4           | 16.7 | 17.5          | 14.5      | 17.9     | 16.1   | 13.8          | 14.0            | 16.3        | 14.0  |
|                                                 | bromohexane                   | 21.1 ± 0.4                 | 17.7               | 16.5 | 15.8           | 19.3 | 19.0          | 17.1      | 19.3     | 18.8   | 16.8          | 17.3            | 18.7        | 15.2  |
| TpRe(CO) <sub>2</sub> L                         | THF                           | 23.9 ± 0.9                 | 20.0               | 18.7 | 22.3           | 14.7 | 14.8          | 20.1      | 19.6     | 13.8   | 21.9          | 20.4            | 18.4        | 17.9  |
| CpRu(CO)(Cl)L                                   | $\eta^2$ -cyclopentene        | 18.8 ± 1.1                 | 18.9               | 17.2 | 20.7           | 16.7 | 16.9          | 17.7      | 16.1     | 16.1   | 19.6          | 19.8            | 20.2        | 24.1  |
|                                                 | $\eta^2$ -cyclohexene         | 17.2 ± 1.4                 | 14.2               | 12.6 | 16.1           | 12.4 | 12.3          | 13.9      | 13.0     | 11.7   | 15.2          | 15.4            | 16.3        | 18.8  |
|                                                 | $\eta^2$ -cyclooctene         | 21.0 ± 0.6                 | 18.5               | 16.5 | 20.4           | 15.8 | 15.6          | 17.6      | 16.1     | 15.2   | 19.3          | 19.5            | 20.0        | 22.8  |
|                                                 | THF                           | 13.7 ± 0.3                 | 15.7               | 16.7 | 17.6           | 12.2 | 12.5          | 17.3      | 15.9     | 11.4   | 19.6          | 19.2            | 18.3        | 22.4  |
| $(\mu$ -pdt)Fe <sub>2</sub> (CO) <sub>5</sub> L | $\eta^2$ -3-hexyne            | 20.9 ± 0.4                 | 20.2               | 19.2 | 20.2           | 18.2 | 18.9          | 18.7      | 19.6     | 17.6   | 19.1          | 18.8            | 19.5        | 21.3  |
|                                                 | $\eta^2$ -cyclohexene         | 19.7 ± 0.6                 | 20.8               | 19.8 | 19.3           | 16.8 | 18.0          | 17.9      | 18.4     | 16.2   | 18.4          | 17.1            | 17.3        | 21.7  |
|                                                 | $\eta^2$ -2,3-dihydrofuran    | 20.9 ± 1.6                 | 22.0               | 21.4 | 19.6           | 19.6 | 20.6          | 18.7      | 19.7     | 19.0   | 19.1          | 18.0            | 18.4        | 23.0  |
|                                                 | MUE                           | 2.1                        | 2.8                | 2.3  | 2.6            | 2.5  | 2.9           | 2.1       | 3.0      | 2.8    | 2.7           | 2.1             | 3.2         |       |
|                                                 | MSE                           | -1.1                       | -2.3               | -1.5 | -1.8           | -1.5 | -2.3          | -1.0      | -2.4     | -1.8   | -1.7          | -0.5            | -1.6        |       |
|                                                 | RMSD                          | 2.5                        | 3.4                | 2.9  | 3.2            | 3.2  | 3.3           | 2.6       | 3.6      | 3.3    | 3.2           | 2.7             | 3.9         |       |
|                                                 | MAXD                          | 4.9                        | 6.6                | 6.7  | 9.2            | 9.1  | 8.2           | 5.5       | 10.1     | 7.9    | 8.3           | 6.8             | 8.7         |       |



**M06 level Optimized Geometries of all complexes used in the present benchmark study**

|                                   |            |            |            |                        |            |            |            |                       |            |            |            |
|-----------------------------------|------------|------------|------------|------------------------|------------|------------|------------|-----------------------|------------|------------|------------|
| <b>(A) CpMn(CO)<sub>2</sub>L</b>  |            |            | O          | 0.2397970              | 1.4041620  | 2.5593260  | H          | 1.9007320             | -1.4102880 | 1.0674360  |            |
| <b>1. 2,3, dihydrofuran (DHF)</b> |            |            | C          | 1.6724550              | 1.5654240  | -0.6532750 | H          | 2.1073060             | 0.9085000  | 1.1252320  |            |
| C                                 | 2.0162890  | -1.2398300 | -0.7318260 | O                      | 2.2327590  | 2.4771290  | -1.0685830 | H                     | 4.2601660  | -0.1142940 | 1.0736790  |
| C                                 | 1.7713650  | -0.1739430 | -1.6233500 | Mn                     | 0.9200880  | 0.0803090  | 0.0234270  | H                     | 1.4183120  | 2.3649330  | -0.9226750 |
| C                                 | 2.0623170  | 1.0431020  | -0.9681150 | C                      | -2.4699910 | -0.0714810 | 0.0854680  | H                     | 0.2740000  | 0.5452710  | -2.1445530 |
| C                                 | 2.4684020  | -0.6753990 | 0.4923340  | H                      | -2.2235580 | -1.1068030 | 0.3216270  | H                     | 3.2264300  | 2.1007590  | 0.5386110  |
| C                                 | 2.4970800  | 0.7235150  | 0.3459270  | H                      | -2.3587500 | 0.5316760  | 0.9859470  | H                     | 1.8248750  | -2.7060020 | -0.0812410 |
| H                                 | 1.8854110  | -2.2896970 | -0.9386830 | C                      | -3.8242690 | 0.0754250  | -0.5514880 | H                     | 4.6265320  | 0.4936570  | -0.5243340 |
| H                                 | 1.3913330  | -0.2707320 | -2.6295140 | H                      | -3.9823520 | 1.1210630  | -0.8251030 | H                     | 4.0525400  | -2.0027110 | -0.3028640 |
| H                                 | 1.9710800  | 2.0323390  | -1.3862920 | H                      | -3.8527030 | -0.4988470 | -1.4804190 | H                     | 3.2868570  | -1.1333690 | -1.6072950 |
| H                                 | 2.7282520  | -1.2230750 | 1.3839260  | C                      | -4.9092800 | -0.3951840 | 0.3990230  |                       |            |            |            |
| H                                 | 2.7809730  | 1.4316050  | 1.1078780  | H                      | -4.9032200 | 0.1847110  | 1.3235420  | <b>4. Cyclooctene</b> |            |            |            |
| C                                 | -0.1691030 | -1.1473880 | 1.2606200  | H                      | -5.8963810 | -0.2931060 | -0.0498910 | C                     | 2.2165100  | -1.7262320 | -0.7154420 |
| O                                 | -0.5354170 | -1.9174630 | 2.0261170  | H                      | -4.7732560 | -1.4447220 | 0.6662960  | C                     | 2.0911050  | -0.7616560 | -1.7481190 |
| C                                 | -0.1267580 | 1.3920760  | 1.0562340  | Cl                     | -1.1661980 | 0.4933690  | -1.0403190 | C                     | 2.7929300  | 0.3946860  | -1.3674440 |
| O                                 | -0.4967010 | 2.2833960  | 1.6785220  |                        |            |            | C          | 3.0075900             | -1.1545220 | 0.3068560  |            |
| Mn                                | 0.4907020  | 0.0287430  | 0.0830250  | <b>3. Cycloheptene</b> |            |            | C          | 3.3560700             | 0.1549750  | -0.0805680 |            |
| C                                 | -1.1468220 | -0.7821970 | -1.1526040 | C                      | -2.4256880 | 0.7351820  | -1.3077960 | H                     | 1.7880630  | -2.7152720 | -0.7094540 |
| C                                 | -1.1126820 | 0.6008330  | -1.2523240 | C                      | -2.0705720 | -0.5809790 | -1.6684340 | H                     | 1.5244760  | -0.8826000 | -2.6588370 |
| C                                 | -2.4552530 | 1.0864680  | -0.7609620 | C                      | -2.3810170 | -1.4474130 | -0.5986020 | H                     | 2.8793900  | 1.3049020  | -1.9386360 |
| C                                 | -2.9571420 | -0.1314110 | 0.0028760  | C                      | -2.9684970 | 0.6832520  | 0.0047470  | H                     | 3.2728520  | -1.6273380 | 1.2391900  |
| O                                 | -2.2924550 | -1.2526490 | -0.5803920 | C                      | -2.9418540 | -0.6553650 | 0.4385740  | H                     | 3.9469850  | 0.8499720  | 0.4936100  |
| H                                 | -0.6596840 | -1.5074700 | -1.7887190 | H                      | -2.3069130 | 1.6184010  | -1.9142050 | C                     | 0.7472890  | -0.4065610 | 1.7238060  |
| H                                 | -0.6144440 | 1.1185990  | -2.0590440 | H                      | -1.6029630 | -0.8727300 | -2.5967840 | O                     | 0.5058660  | -0.7056690 | 2.8055140  |
| H                                 | -3.0915460 | 1.3006930  | -1.6255550 | H                      | -2.2215490 | -2.5130130 | -0.5720270 | C                     | -4.1769500 | -0.8301810 | 0.0150650  |
| H                                 | -4.0299560 | -0.3024260 | -0.0687010 | H                      | -3.3253270 | 1.5251270  | 0.5762730  | C                     | -3.9299460 | 0.6582350  | 0.2420660  |
| H                                 | -2.6873270 | -0.0715370 | 1.0633870  | H                      | -3.2740570 | -1.0138140 | 1.3997990  | C                     | -0.6711340 | -0.8127490 | -0.5457090 |
| H                                 | -2.4311990 | 1.9819060  | -0.1411400 | C                      | -0.4728500 | 1.5883890  | 0.7497140  | C                     | -3.0588870 | 1.4042300  | -0.7732180 |
| <b>2. Chloropropane</b>           |            |            | O          | -0.2512830             | 2.6275230  | 1.1855050  | C          | -0.6570470            | 0.5206660  | -0.9323900 |            |
| C                                 | 0.9279600  | -1.9165310 | 0.8156720  | C                      | -0.4358710 | -0.8069780 | 1.5762190  | C                     | -1.5830060 | 1.5619070  | -0.3630860 |
| C                                 | 0.7613580  | -1.9885320 | -0.5811120 | O                      | -0.1806440 | -1.3364700 | 2.5625260  | H                     | -4.9349580 | -0.9497580 | -0.7656150 |
| C                                 | 1.8728940  | -1.3921660 | -1.2137600 | Mn                     | -0.9435220 | 0.0065370  | 0.0717550  | H                     | -3.5020050 | 0.8112370  | 1.2379190  |
| C                                 | 2.1704310  | -1.2603780 | 1.0613330  | C                      | 1.8783620  | 1.3744580  | -0.9589910 | H                     | -3.1275820 | 0.9326610  | -1.7599200 |
| C                                 | 2.7492490  | -0.9419690 | -0.1846340 | C                      | 0.8146540  | 0.3421420  | -1.2249920 | H                     | -0.3570990 | -1.5323840 | -1.2967700 |
| H                                 | 0.2502220  | -2.2979470 | 1.5621410  | C                      | 0.8288580  | -0.9764160 | -0.7946850 | H                     | -0.3259480 | 0.7373270  | -1.9451820 |
| H                                 | -0.1057850 | -2.3836440 | -1.0892860 | C                      | 2.7436490  | 1.1580430  | 0.2714230  | H                     | -4.6309550 | -1.2286140 | 0.9278680  |
| H                                 | 2.0351130  | -1.3070220 | -2.2753470 | C                      | 1.9479190  | -1.6241360 | -0.0016110 | H                     | -4.9119100 | 1.1366450  | 0.2855320  |
| H                                 | 2.5958540  | -1.0494910 | 2.0291620  | C                      | 3.8176510  | 0.0929060  | 0.0947110  | H                     | -3.4732120 | 2.4067830  | -0.9001290 |
| H                                 | 3.6925660  | -0.4407070 | -0.3315370 | C                      | 3.3253170  | -1.2156970 | -0.5164810 | H                     | -1.2293920 | 2.5446880  | -0.6809920 |
| C                                 | 0.4766860  | 0.9153090  | 1.5455540  | H                      | 2.5286490  | 1.3977910  | -1.8455220 | H                     | -1.5290610 | 1.5729040  | 0.7297660  |
|                                   |            |            |            | H                      | 0.3075270  | -1.6843920 | -1.4304240 | C                     | -2.9795570 | -1.6942000 | -0.3662160 |

|    |            |            |            |
|----|------------|------------|------------|
| H  | -2.7821360 | -1.5756340 | -1.4364040 |
| H  | -3.2640540 | -2.7416790 | -0.2427910 |
| C  | -1.6764520 | -1.4037320 | 0.4003850  |
| H  | -1.8720780 | -0.7406050 | 1.2454780  |
| H  | -1.2742240 | -2.3228560 | 0.8323940  |
| C  | 1.1357440  | 1.7627970  | 0.4695380  |
| O  | 1.1500000  | 2.8810160  | 0.7255420  |
| Mn | 1.2348150  | 0.0244350  | 0.0600560  |

**5. furan**

|    |            |            |            |
|----|------------|------------|------------|
| C  | 1.8431640  | -1.5391300 | -0.3261490 |
| C  | 1.7184930  | -0.7282070 | -1.4799370 |
| C  | 2.1311850  | 0.5804120  | -1.1634840 |
| C  | 2.3395190  | -0.7153010 | 0.7163110  |
| C  | 2.5125260  | 0.5868980  | 0.2088130  |
| H  | 1.6105250  | -2.5890530 | -0.2525430 |
| H  | 1.3394880  | -1.0507280 | -2.4386760 |
| H  | 2.1516660  | 1.4242320  | -1.8340330 |
| H  | 2.5321010  | -1.0269750 | 1.7304950  |
| H  | 2.8678210  | 1.4400320  | 0.7638650  |
| C  | -0.2922260 | -0.5003420 | 1.6022360  |
| O  | -0.7204670 | -0.8671390 | 2.5998770  |
| C  | -0.0271310 | 1.7458280  | 0.4162030  |
| O  | -0.2894090 | 2.8410160  | 0.6332740  |
| Mn | 0.4577860  | 0.0531750  | 0.0706100  |
| C  | -1.1973480 | -1.0563980 | -0.8987050 |
| C  | -1.2596100 | 0.2501020  | -1.3795000 |
| C  | -2.5039650 | 0.7792520  | -0.8680030 |
| C  | -3.0720950 | -0.2065780 | -0.1587050 |
| O  | -2.3373110 | -1.3417730 | -0.1849390 |
| H  | -0.7220500 | -1.9278300 | -1.3180730 |
| H  | -0.7397310 | 0.6342470  | -2.2423690 |
| H  | -3.9759510 | -0.2465240 | 0.4268010  |
| H  | -2.8860810 | 1.7771670  | -1.0008880 |

**6. S(n-But)<sub>2</sub>**

|   |            |            |            |
|---|------------|------------|------------|
| C | -2.6825080 | 1.5544710  | 0.0483050  |
| C | -2.1971160 | 1.2864940  | -1.2467480 |
| C | -2.7512490 | 0.0665530  | -1.7016670 |
| C | -3.5528290 | 0.4863360  | 0.4119220  |
| C | -3.5937520 | -0.4225930 | -0.6656150 |
| H | -2.4419650 | 2.4128820  | 0.6548650  |
| H | -1.4909830 | 1.8963870  | -1.7923880 |
| H | -2.5762190 | -0.3970590 | -2.6582240 |
| H | -4.0873440 | 0.3923080  | 1.3429520  |
| H | -4.1610080 | -1.3392260 | -0.6941200 |

|    |            |            |            |
|----|------------|------------|------------|
| C  | -1.1154640 | -0.2106790 | 1.7896430  |
| O  | -0.8132460 | -0.1226960 | 2.8977230  |
| C  | -1.4962410 | -2.0906450 | 0.0697780  |
| O  | -1.4771010 | -3.2415780 | 0.0582070  |
| Mn | -1.6147320 | -0.3063950 | 0.0779610  |
| S  | 0.5212950  | -0.0072600 | -0.7046790 |
| C  | 1.6079060  | -1.2733820 | 0.0190270  |
| H  | 1.4369480  | -1.2832080 | 1.0999410  |
| H  | 1.2125520  | -2.2078810 | -0.3818810 |
| C  | 3.0770640  | -1.1145630 | -0.3060150 |
| H  | 3.4391660  | -0.1594610 | 0.0859370  |
| H  | 3.2075240  | -1.0765250 | -1.3932270 |
| C  | 3.9239590  | -2.2389180 | 0.2751660  |
| H  | 4.9771120  | -1.9990780 | 0.1082140  |
| H  | 3.7900490  | -2.2649450 | 1.3615850  |
| C  | 3.6174680  | -3.6018590 | -0.3145650 |
| H  | 4.3127460  | -4.3574410 | 0.0509120  |
| H  | 2.6121940  | -3.9421770 | -0.0619380 |
| H  | 3.6936880  | -3.5812240 | -1.4043790 |
| C  | 1.1957400  | 1.4911640  | 0.0970760  |
| H  | 1.6694720  | 1.1818050  | 1.0344370  |
| H  | 0.3226720  | 2.0859880  | 0.3660270  |
| C  | 2.1424900  | 2.2682260  | -0.7962880 |
| H  | 2.8736810  | 1.5877480  | -1.2394970 |
| H  | 1.5728100  | 2.6832950  | -1.6356840 |
| C  | 2.8655840  | 3.3846090  | -0.0595590 |
| H  | 3.4741360  | 2.9467900  | 0.7398350  |
| H  | 3.5696360  | 3.8587570  | -0.7480480 |
| C  | 1.9367940  | 4.4344510  | 0.5191610  |
| H  | 1.2767540  | 4.8384500  | -0.2526620 |
| H  | 1.3059810  | 4.0279250  | 1.3114280  |
| H  | 2.4936740  | 5.2681370  | 0.9466000  |

**7. tetrahydrothiophene**

|   |           |            |            |
|---|-----------|------------|------------|
| C | 1.8460500 | -1.7472950 | 0.5283680  |
| C | 1.4585630 | -1.7707270 | -0.8268820 |
| C | 2.1161110 | -0.7235130 | -1.5117760 |
| C | 2.7634470 | -0.6691630 | 0.6928880  |
| C | 2.9267080 | -0.0435020 | -0.5601940 |
| H | 1.5124800 | -2.4238490 | 1.2984180  |
| H | 0.7486450 | -2.4569550 | -1.2650150 |
| H | 2.0288680 | -0.4926060 | -2.5604490 |
| H | 3.2467530 | -0.3828710 | 1.6126950  |
| H | 3.5553490 | 0.8091290  | -0.7611260 |
| C | 0.3595750 | 0.5021140  | 1.7009900  |
| O | 0.0296610 | 0.7247590  | 2.7820030  |

|    |            |            |            |
|----|------------|------------|------------|
| C  | 0.8576800  | 1.8422990  | -0.4393150 |
| O  | 0.8679720  | 2.9484140  | -0.7545090 |
| Mn | 0.9062080  | 0.1190620  | 0.0464850  |
| C  | -2.3636050 | 1.0634150  | -0.3099300 |
| C  | -3.7374580 | 0.4106350  | -0.3481970 |
| C  | -3.5963290 | -1.0798990 | 0.0284290  |
| C  | -2.1394830 | -1.3637210 | 0.3549810  |
| S  | -1.1934210 | -0.2582510 | -0.7397140 |
| H  | -2.2416410 | 1.8851050  | -1.0130850 |
| H  | -4.1595170 | 0.5001560  | -1.3492110 |
| H  | -3.9105310 | -1.7029760 | -0.8093570 |
| H  | -1.8346260 | -2.3926670 | 0.1692130  |
| H  | -1.8855490 | -1.1050270 | 1.3849760  |
| H  | -2.1021460 | 1.4201250  | 0.6885590  |
| H  | -4.4156260 | 0.9333620  | 0.3271030  |
| H  | -4.2315400 | -1.3446950 | 0.8744430  |

**8. THF**

|    |            |            |            |
|----|------------|------------|------------|
| C  | 1.2626080  | -1.8301390 | 0.7902750  |
| C  | 0.5092020  | -2.0045140 | -0.3866190 |
| C  | 1.1738190  | -1.3811400 | -1.4636100 |
| C  | 2.4247600  | -1.0789000 | 0.4408130  |
| C  | 2.3700900  | -0.8057970 | -0.9409730 |
| H  | 1.0163750  | -2.2055150 | 1.7703110  |
| H  | -0.4581270 | -2.4846070 | -0.4426960 |
| H  | 0.8512250  | -1.3615920 | -2.4918270 |
| H  | 3.2108500  | -0.7787330 | 1.1147020  |
| H  | 3.1072150  | -0.2580820 | -1.5059720 |
| C  | 0.9424180  | 1.0323170  | 1.5427840  |
| O  | 1.1547080  | 1.5890160  | 2.5269720  |
| C  | -2.1415090 | 0.2669480  | -1.1357670 |
| O  | -1.3540110 | 0.2208330  | 0.0522310  |
| C  | -2.1345470 | -0.2308640 | 1.1628710  |
| C  | -3.4632620 | -0.6512630 | 0.5709280  |
| C  | -3.5705150 | 0.2550660  | -0.6468090 |
| H  | -1.8571290 | 1.1595310  | -1.6936590 |
| H  | -1.9172290 | -0.6125160 | -1.7526640 |
| H  | -1.5975870 | -1.0399750 | 1.6608650  |
| H  | -2.2339530 | 0.5997830  | 1.8686580  |
| H  | -3.4233510 | -1.6971750 | 0.2558730  |
| H  | -4.2873430 | -0.5413940 | 1.2733050  |
| H  | -4.2681040 | -0.1081380 | -1.3992310 |
| H  | -3.8781120 | 1.2598050  | -0.3498390 |
| C  | 0.9363090  | 1.5800960  | -0.9805170 |
| O  | 1.1419640  | 2.4957230  | -1.6466090 |
| Mn | 0.7335100  | 0.1085270  | 0.0204470  |

**9. thiophene**

|    |            |            |            |
|----|------------|------------|------------|
| C  | 1.6974560  | -1.7334460 | 0.5734870  |
| C  | 1.4988310  | -1.6983660 | -0.8215920 |
| C  | 2.2004470  | -0.5957590 | -1.3611770 |
| C  | 2.5382220  | -0.6341070 | 0.9131840  |
| C  | 2.8452920  | 0.0607020  | -0.2761690 |
| H  | 1.2890420  | -2.4590370 | 1.2580300  |
| H  | 0.8839750  | -2.3853930 | -1.3849940 |
| H  | 2.2504350  | -0.3159960 | -2.4002990 |
| H  | 2.8819940  | -0.3804580 | 1.9026780  |
| H  | 3.4612460  | 0.9427870  | -0.3483500 |
| C  | -0.0114070 | 0.3976160  | 1.6566110  |
| O  | -0.4666510 | 0.5476450  | 2.6993930  |
| C  | 0.7374260  | 1.8761330  | -0.3309670 |
| O  | 0.7764040  | 2.9980530  | -0.5773420 |
| Mn | 0.7638450  | 0.1246860  | 0.0585630  |
| C  | -2.4547110 | 0.9151750  | -0.6737290 |
| C  | -3.5067130 | 0.3866420  | -0.0171490 |
| C  | -3.3437250 | -1.0048970 | 0.2696660  |
| C  | -2.1700190 | -1.4965760 | -0.1752020 |
| S  | -1.2495710 | -0.2822160 | -0.9983660 |
| H  | -2.2968770 | 1.9295820  | -1.0042480 |
| H  | -4.3799060 | 0.9566640  | 0.2673590  |
| H  | -4.0811480 | -1.5967390 | 0.7935260  |
| H  | -1.7763730 | -2.4973780 | -0.0920900 |

**10. toulene**

|    |            |            |            |
|----|------------|------------|------------|
| C  | 1.7930900  | -1.7312520 | -0.5737910 |
| C  | 1.8922550  | -0.7492450 | -1.5892900 |
| C  | 2.5687840  | 0.3726820  | -1.0802270 |
| C  | 2.4191500  | -1.1994410 | 0.5835440  |
| C  | 2.8900110  | 0.0948750  | 0.2804210  |
| H  | 1.3390660  | -2.7048740 | -0.6654830 |
| H  | 1.4845580  | -0.8324430 | -2.5860810 |
| H  | 2.7974160  | 1.2788820  | -1.6172650 |
| H  | 2.5080480  | -1.6936100 | 1.5379920  |
| H  | 3.4083010  | 0.7544230  | 0.9575540  |
| C  | -0.0666760 | -0.5229540 | 1.5519700  |
| O  | -0.5429320 | -0.9185420 | 2.5189070  |
| C  | 0.6931000  | 1.7494120  | 0.6632220  |
| O  | 0.7147300  | 2.8292940  | 1.0505560  |
| Mn | 0.7862140  | 0.0526670  | 0.0846640  |
| C  | -1.1697380 | -0.5263740 | -1.1357710 |
| C  | -0.9264910 | 0.8171960  | -1.4247060 |
| C  | -1.8041990 | 1.8012310  | -0.9150730 |
| C  | -2.8606910 | 1.4334190  | -0.1347650 |

|   |            |            |            |
|---|------------|------------|------------|
| C | -3.1012910 | 0.0772210  | 0.1525380  |
| C | -2.2856280 | -0.9024840 | -0.3424990 |
| H | -0.6735490 | -1.3063920 | -1.6987330 |
| H | -0.2167100 | 1.0929170  | -2.1933960 |
| H | -1.6302710 | 2.8431890  | -1.1511390 |
| H | -3.5314700 | 2.1874600  | 0.2570890  |
| H | -3.9516590 | -0.1975870 | 0.7657790  |
| C | -2.5178730 | -2.3504240 | -0.0771430 |
| H | -1.6603980 | -2.7889920 | 0.4415680  |
| H | -3.4020360 | -2.5116400 | 0.5380920  |
| H | -2.6438490 | -2.9072050 | -1.0088730 |

**11. triethyl silane (TES)**

|    |            |            |            |
|----|------------|------------|------------|
| C  | -1.6153000 | -1.2243250 | -1.7104790 |
| C  | -1.0015180 | -1.9788980 | -0.6749800 |
| C  | -1.8413270 | -1.9187580 | 0.4607440  |
| C  | -2.8243930 | -0.7056270 | -1.2090820 |
| C  | -2.9704870 | -1.1247230 | 0.1373010  |
| H  | -1.2146450 | -1.0617130 | -2.6978710 |
| H  | -0.0823110 | -2.5359370 | -0.7561740 |
| H  | -1.6463860 | -2.3844900 | 1.4140690  |
| H  | -3.5074270 | -0.0684630 | -1.7481530 |
| H  | -3.7922990 | -0.8878870 | 0.7923340  |
| C  | -1.8295450 | 1.7116890  | -0.2327140 |
| O  | -2.2514480 | 2.7654420  | -0.3786090 |
| C  | -0.8609640 | 0.4339330  | 1.6755560  |
| O  | -0.7095010 | 0.6692120  | 2.7902710  |
| Mn | -1.2014670 | 0.0419690  | -0.0288250 |
| Si | 1.2665150  | -0.0032160 | 0.0171060  |
| H  | -0.0695140 | 0.7075170  | -0.8756750 |
| C  | 1.7262090  | -1.2621380 | 1.3630070  |
| H  | 1.4451940  | -0.8263340 | 2.3256640  |
| H  | 1.1104240  | -2.1589950 | 1.2525030  |
| C  | 3.1986500  | -1.6523120 | 1.3871380  |
| H  | 3.4207380  | -2.3265840 | 2.2168480  |
| H  | 3.4965710  | -2.1633410 | 0.4694920  |
| H  | 3.8480150  | -0.7814130 | 1.5000920  |
| C  | 2.0426530  | -0.5844490 | -1.6213210 |
| H  | 1.4426760  | -0.1861080 | -2.4451440 |
| H  | 1.9341660  | -1.6736220 | -1.6795610 |
| C  | 3.5038780  | -0.2045880 | -1.8310020 |
| H  | 4.1474700  | -0.5895670 | -1.0386560 |
| H  | 3.8887090  | -0.5923740 | -2.7764270 |
| H  | 3.6366230  | 0.8786690  | -1.8507120 |
| C  | 2.0435470  | 1.6369800  | 0.5195470  |
| H  | 1.6998660  | 1.8834730  | 1.5290770  |

|   |           |           |            |
|---|-----------|-----------|------------|
| H | 3.1227380 | 1.4706380 | 0.6085130  |
| C | 1.7682730 | 2.7930510 | -0.4300630 |
| H | 2.3196200 | 3.6934810 | -0.1534880 |
| H | 2.0457570 | 2.5471750 | -1.4588460 |
| H | 0.7090240 | 3.0554310 | -0.4419650 |

**(B) BzCr(CO)<sub>2</sub>L****12. 2,3-dihydrofuran**

|    |            |            |            |
|----|------------|------------|------------|
| C  | -0.2963410 | -1.0432730 | 1.3714810  |
| O  | -0.7264160 | -1.7195400 | 2.1954130  |
| C  | -0.2485120 | 1.4649160  | 0.9974250  |
| O  | -0.6808010 | 2.3609300  | 1.5775250  |
| C  | -1.3027040 | -0.8728470 | -1.1189000 |
| C  | -1.2451490 | 0.4931950  | -1.3239250 |
| C  | -2.5653040 | 1.0414730  | -0.8361030 |
| C  | -3.0671370 | -0.1042780 | 0.0326650  |
| O  | -2.4295580 | -1.2795480 | -0.4735730 |
| H  | -0.8369850 | -1.6554960 | -1.6993340 |
| H  | -0.7678830 | 0.9307710  | -2.1879930 |
| H  | -3.2230810 | 1.2029700  | -1.6965950 |
| H  | -4.1433230 | -0.2656490 | -0.0049100 |
| H  | -2.7730420 | 0.0335390  | 1.0784230  |
| H  | -2.5079280 | 1.9794070  | -0.2855040 |
| Cr | 0.4642500  | 0.0349070  | 0.0793080  |
| C  | 1.8712640  | 0.9699370  | -1.3450480 |
| C  | 2.2895530  | 1.2283230  | -0.0342980 |
| C  | 2.4908230  | 0.1759160  | 0.8781730  |
| C  | 2.2544970  | -1.1451000 | 0.4631320  |
| C  | 1.8347140  | -1.4230590 | -0.8478780 |
| C  | 1.6081850  | -0.3570390 | -1.7325620 |
| H  | 1.6758350  | 1.7865240  | -2.0255800 |
| H  | 2.4165140  | 2.2511350  | 0.2945880  |
| H  | 2.7817550  | 0.3838650  | 1.8971340  |
| H  | 2.3547950  | -1.9533690 | 1.1751790  |
| H  | 1.6181980  | -2.4388590 | -1.1470960 |
| H  | 1.2140080  | -0.5563450 | -2.7215900 |

**13. 3-hexyne**

|    |            |            |            |
|----|------------|------------|------------|
| C  | -0.7714660 | 0.8307100  | 1.5948790  |
| O  | -0.9867730 | 1.5322980  | 2.4824470  |
| C  | 0.4374140  | -1.3759630 | 1.3471950  |
| O  | 0.9879590  | -2.0811300 | 2.0721090  |
| Cr | -0.4679090 | -0.2909230 | 0.1604760  |
| C  | 1.5782380  | 0.1462450  | -0.5521380 |
| C  | 1.1349250  | 1.2475450  | -0.2070700 |

|   |            |            |            |
|---|------------|------------|------------|
| C | 1.1313360  | 2.6898750  | 0.0670760  |
| H | 1.0562910  | 2.8485590  | 1.1467110  |
| H | 2.1037320  | 3.0935460  | -0.2337360 |
| C | 0.0214280  | 3.4574460  | -0.6300670 |
| H | -0.9577380 | 3.1051540  | -0.3025730 |
| H | 0.0882260  | 4.5219580  | -0.4062800 |
| H | 0.0804390  | 3.3367980  | -1.7130890 |
| C | 2.5981000  | -0.8193480 | -0.9948800 |
| H | 2.8737970  | -0.5939860 | -2.0307160 |
| H | 2.1897700  | -1.8330800 | -1.0030940 |
| C | 3.8333610  | -0.7732420 | -0.1067540 |
| H | 3.5722350  | -1.0168500 | 0.9233750  |
| H | 4.5859160  | -1.4858030 | -0.4458290 |
| H | 4.2768710  | 0.2226100  | -0.1116990 |
| C | -1.3721790 | 0.3238990  | -1.7546460 |
| C | -0.6674990 | -0.8788430 | -1.9481620 |
| C | -0.9199810 | -1.9883460 | -1.1341380 |
| C | -1.9018750 | -1.9059890 | -0.1191430 |
| C | -2.6122940 | -0.7195120 | 0.0653630  |
| C | -2.3327600 | 0.4059070  | -0.7412700 |
| H | -1.1278840 | 1.1955750  | -2.3452230 |
| H | 0.1168550  | -0.9262210 | -2.6917650 |
| H | -0.3385950 | -2.8925760 | -1.2520000 |
| H | -2.0759130 | -2.7477660 | 0.5365520  |
| H | -3.3227950 | -0.6391730 | 0.8763750  |
| H | -2.8413590 | 1.3417570  | -0.5523560 |

14. benzene

|    |            |            |            |
|----|------------|------------|------------|
| C  | -0.1087680 | -0.7848300 | 1.5751680  |
| O  | -0.5184960 | -1.2951090 | 2.5204770  |
| C  | 0.0436370  | 1.6519060  | 0.7740280  |
| O  | -0.2642030 | 2.6660230  | 1.2208870  |
| Cr | 0.6525820  | 0.0354080  | 0.0912390  |
| C  | -1.4382380 | 0.3881230  | -1.4813780 |
| C  | -2.4290020 | 1.1893100  | -0.8941110 |
| C  | -3.3575550 | 0.6350830  | -0.0506860 |
| C  | -3.3332980 | -0.7376690 | 0.2178200  |
| C  | -2.3790420 | -1.5348260 | -0.3605880 |
| C  | -1.4149240 | -0.9782000 | -1.2136880 |
| H  | -0.7930320 | 0.8117540  | -2.2387780 |
| H  | -2.4522730 | 2.2500480  | -1.1092720 |
| H  | -4.1170870 | 1.2592400  | 0.4022080  |
| H  | -4.0728010 | -1.1708150 | 0.8789130  |
| H  | -2.3649860 | -2.5993630 | -0.1640430 |
| H  | -0.7589270 | -1.6339350 | -1.7674670 |
| C  | 2.3086120  | -1.3095550 | 0.4205310  |

|   |           |            |            |
|---|-----------|------------|------------|
| C | 1.8362850 | -1.5351210 | -0.8843680 |
| C | 1.7106580 | -0.4399130 | -1.7631960 |
| C | 2.0709220 | 0.8524320  | -1.3694650 |
| C | 2.5218860 | 1.0599030  | -0.0436600 |
| C | 2.6850670 | -0.0206090 | 0.8379540  |
| H | 2.3498130 | -2.1312350 | 1.1231730  |
| H | 1.5314990 | -2.5251130 | -1.1916220 |
| H | 1.2883920 | -0.5959950 | -2.7488690 |
| H | 1.9420600 | 1.6886040  | -2.0416380 |
| H | 2.7361210 | 2.0637060  | 0.2977520  |
| H | 3.0133980 | 0.1498150  | 1.8528440  |

15. TES

|    |            |            |            |
|----|------------|------------|------------|
| C  | -1.5307480 | 1.9157290  | -0.1251010 |
| O  | -1.7641810 | 3.0376840  | -0.1950090 |
| C  | -0.6016300 | 0.4530010  | 1.6998480  |
| O  | -0.2609640 | 0.6612380  | 2.7823280  |
| Si | 1.3965860  | -0.0565440 | -0.1341610 |
| H  | 0.0812290  | 0.5352070  | -0.9488430 |
| C  | 1.8479190  | -1.4200130 | 1.1225850  |
| H  | 1.0047800  | -1.6324920 | 1.7804720  |
| H  | 2.0164680  | -2.3335280 | 0.5400400  |
| C  | 3.0760220  | -1.1098060 | 1.9692740  |
| H  | 3.3272580  | -1.9417180 | 2.6304950  |
| H  | 3.9570260  | -0.9045350 | 1.3573970  |
| H  | 2.9070230  | -0.2341260 | 2.5987100  |
| C  | 2.1406900  | -0.6392210 | -1.7780350 |
| H  | 1.8904610  | 0.0926270  | -2.5527370 |
| H  | 1.6371370  | -1.5667540 | -2.0739930 |
| C  | 3.6452120  | -0.8638390 | -1.7275910 |
| H  | 3.9134840  | -1.6238180 | -0.9900400 |
| H  | 4.0458980  | -1.1939140 | -2.6881090 |
| H  | 4.1770480  | 0.0505700  | -1.4537690 |
| C  | 2.2181230  | 1.5722880  | 0.3310560  |
| H  | 1.7761940  | 1.9407560  | 1.2612040  |
| H  | 3.2698200  | 1.3753190  | 0.5612200  |
| C  | 2.1166690  | 2.6292570  | -0.7597210 |
| H  | 2.5689380  | 3.5744510  | -0.4545680 |
| H  | 2.6229150  | 2.3102770  | -1.6738700 |
| H  | 1.0782050  | 2.8401740  | -1.0234640 |
| Cr | -1.1898790 | 0.0962200  | -0.0031420 |
| C  | -1.5609190 | -1.2163260 | -1.7218630 |
| C  | -1.0904560 | -1.9843860 | -0.6335240 |
| C  | -1.7541230 | -1.9111060 | 0.6011520  |
| C  | -2.8778410 | -1.0738740 | 0.7573240  |
| C  | -3.3066750 | -0.2811390 | -0.3088570 |

|   |            |            |            |
|---|------------|------------|------------|
| C | -2.6547710 | -0.3658790 | -1.5642300 |
| H | -1.0222270 | -1.2299810 | -2.6597120 |
| H | -0.2276180 | -2.6253970 | -0.7488080 |
| H | -1.3767660 | -2.4686610 | 1.4475070  |
| H | -3.3530760 | -0.9834240 | 1.7238270  |
| H | -4.1245560 | 0.4120110  | -0.1720940 |
| H | -2.9684130 | 0.2697980  | -2.3796760 |

16. THF

|    |            |            |            |
|----|------------|------------|------------|
| C  | -0.5794460 | 1.9074150  | -0.3646960 |
| O  | -0.5899460 | 3.0348110  | -0.6094210 |
| C  | 2.1377420  | -1.3379870 | 0.1140730  |
| O  | 1.4024860  | -0.2917030 | -0.5371540 |
| C  | 2.2764900  | 0.8121430  | -0.8057800 |
| C  | 3.6709930  | 0.2463610  | -0.6974710 |
| C  | 3.4890480  | -0.7444720 | 0.4415510  |
| H  | 1.5748340  | -1.6633400 | 0.9899760  |
| H  | 2.2247040  | -2.1801600 | -0.5809340 |
| H  | 2.0152210  | 1.2161130  | -1.7840080 |
| H  | 2.1071440  | 1.5889150  | -0.0519630 |
| H  | 3.9529100  | -0.2722970 | -1.6168180 |
| H  | 4.4156340  | 1.0138110  | -0.4940780 |
| H  | 4.2730540  | -1.4970680 | 0.5041300  |
| H  | 3.4440010  | -0.2137910 | 1.3959740  |
| Cr | -0.6786300 | 0.1036320  | 0.0392870  |
| C  | -0.1161190 | 0.5204810  | 1.7562180  |
| O  | 0.1896970  | 0.7729030  | 2.8397330  |
| C  | -1.5238730 | -1.8444330 | 0.5838420  |
| C  | -2.3766490 | -0.7693490 | 0.9572740  |
| C  | -2.8420210 | 0.1347230  | -0.0135250 |
| C  | -2.3584880 | 0.0419620  | -1.3317020 |
| C  | -1.4511560 | -0.9644040 | -1.6968240 |
| C  | -1.0540480 | -1.9140400 | -0.7249470 |
| H  | -1.1787770 | -2.5497790 | 1.3271930  |
| H  | -2.6936540 | -0.6642920 | 1.9855220  |
| H  | -3.4949520 | 0.9475040  | 0.2700300  |
| H  | -2.6381240 | 0.7958860  | -2.0557700 |
| H  | -1.0438920 | -0.9988280 | -2.6964820 |
| H  | -0.3237310 | -2.6683450 | -0.9890000 |

(C) Cr(CO)<sub>5</sub>L

17. benzene

|    |           |            |            |
|----|-----------|------------|------------|
| Cr | 0.7227380 | 0.0000580  | 0.0309140  |
| C  | 0.7528100 | 1.9127580  | 0.0687340  |
| C  | 0.7530200 | -1.9126390 | 0.0687000  |
| C  | 1.6582710 | 0.0001260  | -1.6370840 |

|   |            |            |            |
|---|------------|------------|------------|
| C | 2.3399500  | 0.0000910  | 0.9237120  |
| C | -0.2161730 | 0.0000200  | 1.7020620  |
| O | 0.7996910  | 3.0504490  | 0.1173330  |
| O | 0.8000400  | -3.0503260 | 0.1173090  |
| O | 2.2457930  | -0.0000280 | -2.6137640 |
| O | 3.3429780  | 0.0000120  | 1.4755250  |
| O | -0.7349800 | 0.0000630  | 2.7152790  |
| C | -3.2744590 | -0.6987690 | 0.2906140  |
| C | -2.3983610 | -1.3897320 | -0.5106200 |
| C | -1.5046430 | -0.6958830 | -1.3366470 |
| C | -1.5049990 | 0.6961880  | -1.3365680 |
| C | -2.3990710 | 1.3895000  | -0.5104830 |
| C | -3.2748200 | 0.6980030  | 0.2906760  |
| H | -3.9683240 | -1.2369060 | 0.9233540  |
| H | -2.4006390 | -2.4725180 | -0.5191790 |
| H | -0.9113040 | -1.2375020 | -2.0614240 |
| H | -0.9118720 | 1.2381880  | -2.0612370 |
| H | -2.4019210 | 2.4722860  | -0.5189440 |
| H | -3.9689740 | 1.2357220  | 0.9234560  |

**18. 3-hexyne**

|    |            |            |            |
|----|------------|------------|------------|
| Cr | -0.6174140 | -0.0009020 | -0.0269460 |
| C  | -1.1808530 | -0.0027020 | 1.8055040  |
| C  | 0.1476700  | 0.0010990  | -1.7871230 |
| C  | -0.8089990 | -1.8929720 | -0.0596620 |
| C  | -2.3626490 | -0.0033360 | -0.6777800 |
| C  | -0.8149990 | 1.8905870  | -0.0576760 |
| O  | -1.5083500 | -0.0039340 | 2.8954200  |
| O  | 0.6304090  | 0.0020880  | -2.8180470 |
| O  | -1.0084530 | -3.0160020 | -0.0838190 |
| O  | -3.4334420 | -0.0046590 | -1.0795990 |
| O  | -1.0181770 | 3.0129730  | -0.0806870 |
| C  | 1.5326660  | -0.6105640 | 0.7486900  |
| C  | 1.5309350  | 0.6149660  | 0.7486960  |
| C  | 2.0313670  | 1.9882890  | 0.8680060  |
| H  | 2.9048370  | 1.9519220  | 1.5263080  |
| H  | 1.3026860  | 2.6281880  | 1.3696360  |
| C  | 2.4289720  | 2.5892200  | -0.4722000 |
| H  | 1.5715250  | 2.6881410  | -1.1372810 |
| H  | 2.8595790  | 3.5801820  | -0.3335100 |
| H  | 3.1665310  | 1.9612780  | -0.9726580 |
| C  | 2.0370080  | -1.9824540 | 0.8680600  |
| H  | 2.9098040  | -1.9437630 | 1.5271210  |
| H  | 1.3097720  | -2.6246520 | 1.3688470  |
| C  | 2.4375170  | -2.5817270 | -0.4720290 |
| H  | 2.8706740  | -3.5715830 | -0.3333740 |

|   |           |            |            |
|---|-----------|------------|------------|
| H | 1.5809750 | -2.6826600 | -1.1379730 |
| H | 3.1738500 | -1.9515620 | -0.9714940 |

**(D) CpRe(CO)<sub>2</sub>L**

**19. heptane**

|    |            |            |            |
|----|------------|------------|------------|
| C  | 1.6132980  | 1.9823320  | -1.1397990 |
| C  | 0.5690510  | 2.0464150  | -0.1887350 |
| C  | 1.1055010  | 1.9186370  | 1.1135340  |
| C  | 2.8300320  | 1.7668520  | -0.4173670 |
| C  | 2.5166130  | 1.7289030  | 0.9711560  |
| H  | 1.5141770  | 2.0893450  | -2.2071790 |
| H  | -0.4806510 | 2.1584510  | -0.4210690 |
| H  | 0.5559470  | 1.9677980  | 2.0388330  |
| H  | 3.8182440  | 1.7035560  | -0.8425400 |
| H  | 3.2275410  | 1.6299080  | 1.7751730  |
| C  | 2.6213510  | -1.1504860 | -1.1969380 |
| O  | 3.3089690  | -1.7276040 | -1.9215740 |
| C  | 2.0667650  | -1.2058070 | 1.4318570  |
| O  | 2.4136940  | -1.8131980 | 2.3504730  |
| Re | 1.6023460  | -0.0454390 | -0.0129360 |
| C  | -0.7224190 | -1.1335190 | -0.7041650 |
| H  | -0.5815960 | -0.3214440 | -1.4171280 |
| H  | 0.1901770  | -1.4265790 | -0.0971690 |
| H  | -0.8668450 | -2.0363020 | -1.3013880 |
| C  | -1.8844250 | -0.8703840 | 0.2293030  |
| H  | -2.0218280 | -1.7235770 | 0.9008600  |
| H  | -1.6519270 | -0.0176910 | 0.8761040  |
| C  | -3.1708810 | -0.5998520 | -0.5258750 |
| H  | -3.3876040 | -1.4418420 | -1.1944440 |
| H  | -3.0303670 | 0.2700730  | -1.1807400 |
| C  | -4.3577310 | -0.3594530 | 0.3850060  |
| H  | -4.1366340 | 0.4780500  | 1.0580120  |
| H  | -4.4998740 | -1.2317600 | 1.0342060  |
| C  | -5.6422990 | -0.0762370 | -0.3668700 |
| H  | -5.8624200 | -0.9130570 | -1.0411810 |
| H  | -5.5011130 | 0.7972960  | -1.0154660 |
| C  | -6.8313570 | 0.1612620  | 0.5433310  |
| H  | -6.6072140 | 0.9955980  | 1.2165850  |
| H  | -6.9695090 | -0.7128320 | 1.1885570  |
| C  | -8.1060820 | 0.4441010  | -0.2238430 |
| H  | -8.3598320 | -0.3903120 | -0.8814240 |
| H  | -8.9548170 | 0.6125640  | 0.4392850  |
| H  | -7.9956370 | 1.3305250  | -0.8524800 |

**(E) (DMP)Mn(CO)<sub>2</sub>L**

**20. THF**

|    |            |            |            |
|----|------------|------------|------------|
| C  | 1.9086770  | -1.1001700 | -0.8173370 |
| C  | 0.9192030  | -0.7124060 | -1.7371990 |
| C  | 0.9192180  | 0.7123310  | -1.7372000 |
| C  | 1.9086980  | 1.1000800  | -0.8173470 |
| N  | 2.4960160  | -0.0000510 | -0.2396970 |
| H  | 0.2954430  | -1.3703720 | -2.3225140 |
| H  | 0.2954640  | 1.3703030  | -2.3225160 |
| C  | 2.3824880  | 2.4703910  | -0.5030020 |
| H  | 2.7216340  | 2.5310600  | 0.5302640  |
| H  | 3.2255630  | 2.7340520  | -1.1448760 |
| H  | 1.5949440  | 3.2079720  | -0.6593940 |
| C  | 2.3823800  | -2.4705030 | -0.5029460 |
| H  | 2.7215140  | -2.5311550 | 0.5303250  |
| H  | 1.5947750  | -3.2080280 | -0.6593070 |
| H  | 3.2254360  | -2.7342640 | -1.1448040 |
| Mn | 0.4108550  | -0.0000490 | 0.2214790  |
| C  | 0.2783150  | -1.2815030 | 1.4732810  |
| C  | 0.2785100  | 1.2815540  | 1.4731490  |
| O  | 0.2725610  | -2.1130400 | 2.2673400  |
| O  | 0.2729660  | 2.1132080  | 2.2670850  |
| C  | -2.4430780 | 1.1334070  | -0.0677700 |
| O  | -1.6170950 | 0.0000200  | -0.3180080 |
| C  | -2.4431460 | -1.1333300 | -0.0678360 |
| C  | -3.7901990 | -0.7698770 | -0.6695350 |
| C  | -3.7902610 | 0.7700270  | -0.6692670 |
| H  | -2.5102060 | 1.2902840  | 1.0162520  |
| H  | -1.9573570 | 2.0005740  | -0.5132910 |
| H  | -1.9574050 | -2.0005310 | -0.5132670 |
| H  | -2.5104320 | -1.2901680 | 1.0161830  |
| H  | -3.8776660 | -1.1547480 | -1.6845080 |
| H  | -4.6097380 | -1.1894110 | -0.0887550 |
| H  | -3.8780750 | 1.1552570  | -1.6840720 |
| H  | -4.6096730 | 1.1892710  | -0.0880960 |

**21. benzene**

|   |           |            |            |
|---|-----------|------------|------------|
| C | 2.2856110 | 0.7082530  | -0.3623480 |
| C | 2.3747640 | 0.2277580  | 0.9627420  |
| C | 2.0428550 | -1.1544870 | 0.8982690  |
| C | 1.7516710 | -1.4227120 | -0.4447010 |
| N | 1.8805110 | -0.2847810 | -1.2130400 |
| H | 2.6753290 | 0.7921320  | 1.8309030  |
| H | 2.0174110 | -1.8615200 | 1.7126710  |
| C | 1.4717450 | -2.7415480 | -1.0641800 |
| H | 0.7063550 | -2.6785080 | -1.8380490 |

|    |            |            |            |
|----|------------|------------|------------|
| H  | 2.3758090  | -3.1222150 | -1.5436970 |
| H  | 1.1602230  | -3.4719560 | -0.3170650 |
| C  | 2.6446170  | 2.0558820  | -0.8679060 |
| H  | 3.6859220  | 2.0651790  | -1.1958330 |
| H  | 2.0243090  | 2.3247340  | -1.7220430 |
| H  | 2.5280400  | 2.8144110  | -0.0942950 |
| Mn | 0.3788040  | 0.0767800  | 0.2788810  |
| C  | -0.3161020 | 0.0517330  | 1.9298040  |
| C  | -0.2518240 | 1.7428330  | 0.0463720  |
| O  | -0.6886060 | 0.0388340  | 3.0151080  |
| O  | -0.5883290 | 2.8319800  | -0.0788930 |
| C  | -1.4793300 | -1.3729120 | -0.2494290 |
| C  | -2.6441380 | -1.1747620 | 0.5230140  |
| C  | -3.5443470 | -0.2046890 | 0.1837220  |
| C  | -3.3332900 | 0.5885850  | -0.9565530 |
| C  | -2.2180510 | 0.4038770  | -1.7235290 |
| C  | -1.2612410 | -0.5708180 | -1.3717930 |
| H  | -0.8867070 | -2.2605600 | -0.0788170 |
| H  | -2.8201870 | -1.8053230 | 1.3855360  |
| H  | -4.4342870 | -0.0588620 | 0.7824320  |
| H  | -4.0622260 | 1.3403780  | -1.2305940 |
| H  | -2.0573970 | 1.0033300  | -2.6105980 |
| H  | -0.4684330 | -0.7957050 | -2.0719060 |

## 22. bromohexane

|    |            |            |            |
|----|------------|------------|------------|
| C  | 3.5507480  | 0.3053240  | -1.0298230 |
| C  | 2.4179600  | 0.2059400  | -1.8610070 |
| C  | 1.5637390  | 1.2792560  | -1.4813710 |
| C  | 2.2209050  | 1.9599270  | -0.4441330 |
| N  | 3.4228310  | 1.3535790  | -0.1528800 |
| H  | 2.2517740  | -0.5252750 | -2.6361870 |
| H  | 0.6027520  | 1.5311620  | -1.9038650 |
| C  | 1.8046240  | 3.2069600  | 0.2435200  |
| H  | 2.1733700  | 3.2221420  | 1.2682580  |
| H  | 2.2152560  | 4.0789910  | -0.2695610 |
| H  | 0.7182640  | 3.3052480  | 0.2595580  |
| C  | 4.7913770  | -0.5067480 | -1.0716840 |
| H  | 5.2349030  | -0.5787440 | -0.0795360 |
| H  | 4.5962410  | -1.5116600 | -1.4456970 |
| H  | 5.5245900  | -0.0367550 | -1.7301540 |
| Mn | 1.8543450  | -0.0304170 | 0.1958670  |
| C  | 2.6531090  | -1.4511650 | 0.9637590  |
| C  | 1.2501300  | 0.5382130  | 1.7897750  |
| O  | 3.2246370  | -2.3215190 | 1.4442660  |
| O  | 0.8977400  | 0.9517880  | 2.8018790  |
| C  | -1.6839410 | -0.0985720 | 0.2361820  |

|    |            |            |            |
|----|------------|------------|------------|
| H  | -1.6165820 | -0.0690430 | 1.3223960  |
| H  | -1.4205130 | 0.8810330  | -0.1622230 |
| C  | -3.0124400 | -0.6006170 | -0.2556660 |
| H  | -3.1841900 | -1.6157210 | 0.1151330  |
| H  | -3.0031630 | -0.6670630 | -1.3478500 |
| C  | -4.1429850 | 0.3088980  | 0.1959200  |
| H  | -4.1447030 | 0.3760430  | 1.2898780  |
| H  | -3.9620720 | 1.3272880  | -0.1673560 |
| C  | -5.5005480 | -0.1646870 | -0.2840010 |
| H  | -5.4971330 | -0.2337800 | -1.3785190 |
| H  | -5.6800030 | -1.1841330 | 0.0780820  |
| C  | -6.6366400 | 0.7354470  | 0.1606410  |
| H  | -6.6349580 | 0.8024380  | 1.2536620  |
| H  | -6.4516850 | 1.7525740  | -0.2007780 |
| C  | -7.9864240 | 0.2510420  | -0.3259030 |
| H  | -8.7963180 | 0.9041980  | -0.0010170 |
| H  | -8.0155320 | 0.2043560  | -1.4167140 |
| H  | -8.1998270 | -0.7526440 | 0.0481190  |
| Br | -0.2213030 | -1.2795070 | -0.3345300 |

## (F) TpRe(CO)<sub>2</sub>L

### 23. THF

|    |            |            |            |
|----|------------|------------|------------|
| Re | -0.1697620 | -0.7053680 | 0.0362780  |
| C  | -0.6165030 | -1.9544190 | -1.3100470 |
| C  | -0.3184120 | -2.0871090 | 1.3210010  |
| O  | -0.3926800 | -2.9331860 | 2.1130090  |
| O  | -0.8803800 | -2.7186400 | -2.1449180 |
| N  | 1.9208590  | -0.9401230 | -0.2251910 |
| C  | 2.7076340  | -1.9995160 | -0.3764570 |
| C  | 3.9907200  | -0.2280260 | -0.4653410 |
| C  | 4.0328810  | -1.6000460 | -0.5330200 |
| H  | 2.2766860  | -2.9877330 | -0.3641270 |
| H  | 4.7727180  | 0.5100560  | -0.5335460 |
| H  | 4.8961360  | -2.2256030 | -0.6744420 |
| N  | 0.0743940  | 0.9837220  | -1.3852770 |
| C  | -0.6267020 | 1.3943600  | -2.4368960 |
| C  | -0.0407430 | 2.5277000  | -2.9964210 |
| H  | -1.5035440 | 0.8436040  | -2.7436810 |
| C  | 1.0670720  | 2.7625720  | -2.2110390 |
| H  | -0.3676580 | 3.0859580  | -3.8556780 |
| H  | 1.8277830  | 3.5238050  | -2.2688590 |
| N  | 0.4408560  | 0.8279690  | 1.5308680  |
| C  | 0.0703390  | 1.0844230  | 2.7809380  |
| C  | 0.8242460  | 2.1313600  | 3.3056930  |
| H  | -0.7070680 | 0.4930570  | 3.2405060  |
| C  | 1.6819060  | 2.4793640  | 2.2851380  |

|   |            |            |            |
|---|------------|------------|------------|
| H | 0.7615670  | 2.5637490  | 4.2884940  |
| H | 2.4548730  | 3.2286550  | 2.2336200  |
| B | 2.1532610  | 1.5845840  | -0.1320670 |
| H | 3.0351970  | 2.3909100  | -0.2007790 |
| N | 1.4343640  | 1.6882410  | 1.2316800  |
| N | 2.7155380  | 0.1556620  | -0.2806940 |
| N | 1.1153010  | 1.8271960  | -1.2519160 |
| O | -2.2618150 | 0.0439880  | 0.2719010  |
| C | -3.4025230 | -0.7249220 | -0.1324760 |
| C | -2.6293340 | 1.4050410  | 0.5306340  |
| C | -4.5906190 | 0.1715170  | 0.1316080  |
| H | -3.2945500 | -0.9656450 | -1.1952600 |
| H | -3.3974540 | -1.6575460 | 0.4327500  |
| C | -3.9944210 | 1.5532380  | -0.0971440 |
| H | -1.8637920 | 2.0552170  | 0.1064410  |
| H | -2.6608870 | 1.5621950  | 1.6138670  |
| H | -4.9262110 | 0.0711690  | 1.1660360  |
| H | -5.4315600 | -0.0540590 | -0.5214040 |
| H | -4.5741850 | 2.3589270  | 0.3494550  |
| H | -3.8956310 | 1.7533040  | -1.1671560 |

## (G) CpRu(CO)(Cl)L

### 24. cyclopentene

|    |            |            |            |
|----|------------|------------|------------|
| C  | 1.2916530  | -1.3074280 | 1.5085750  |
| C  | 0.4288710  | -2.0480010 | 0.6648660  |
| C  | 0.9725640  | -1.9887530 | -0.6621410 |
| C  | 2.3445850  | -0.7609440 | 0.7118940  |
| C  | 2.1382260  | -1.2083480 | -0.6214660 |
| H  | 1.1711910  | -1.1748950 | 2.5719850  |
| H  | -0.4319680 | -2.6164180 | 0.9765150  |
| H  | 0.5530790  | -2.4491210 | -1.5420050 |
| H  | 3.1609630  | -0.1473850 | 1.0538800  |
| H  | 2.7240390  | -0.9057600 | -1.4747270 |
| Ru | 0.4220740  | 0.0743040  | 0.0603680  |
| C  | 0.0768030  | 1.3900140  | 1.3509210  |
| O  | -0.1127600 | 2.1513150  | 2.1823230  |
| Cl | 1.0988760  | 1.7698600  | -1.5182030 |
| C  | -2.9051020 | -0.9736910 | 0.3756290  |
| C  | -2.3299990 | -1.2731360 | -1.0108890 |
| C  | -1.4011840 | -0.1175890 | -1.2841290 |
| C  | -1.6950050 | 0.9221800  | -0.4201290 |
| C  | -2.8281210 | 0.5480610  | 0.4913700  |
| H  | -2.2831700 | -1.4281100 | 1.1483860  |
| H  | -3.1241640 | -1.2367450 | -1.7663410 |
| H  | -1.8771360 | -2.2621840 | -1.0925660 |
| H  | -0.9566010 | 0.0463080  | -2.2572820 |

|   |            |            |            |
|---|------------|------------|------------|
| H | -1.4713530 | 1.9530350  | -0.6608870 |
| H | -3.7371120 | 1.0112370  | 0.0893300  |
| H | -2.7219190 | 0.9069520  | 1.5156750  |
| H | -3.9156570 | -1.3586350 | 0.5057160  |

**25. cyclohexene**

|    |            |            |            |
|----|------------|------------|------------|
| C  | -2.4973340 | 0.5395050  | -1.0779230 |
| C  | -2.0062980 | -0.7018580 | -1.5484140 |
| C  | -2.0392620 | -1.6352060 | -0.4623870 |
| C  | -2.8000980 | 0.3908050  | 0.3138190  |
| C  | -2.5247810 | -0.9533250 | 0.6698110  |
| H  | -2.6284720 | 1.4333130  | -1.6660660 |
| H  | -1.6915990 | -0.9159170 | -2.5587020 |
| H  | -1.7379010 | -2.6690330 | -0.4977380 |
| H  | -3.1959030 | 1.1486650  | 0.9693840  |
| H  | -2.5872770 | -1.3573060 | 1.6677350  |
| Ru | -0.6454970 | 0.0778170  | -0.0097400 |
| C  | -0.0855170 | 1.8510980  | 0.1896590  |
| O  | 0.1844320  | 2.9539310  | 0.3155890  |
| Cl | 0.2778050  | -0.2774220 | 2.1922190  |
| C  | 2.1833420  | -1.7470520 | 0.0155620  |
| C  | 1.1171820  | -1.1874620 | -0.8817030 |
| C  | 1.1899990  | 0.0685180  | -1.4552380 |
| C  | 2.3707960  | 0.9628450  | -1.2065750 |
| C  | 3.1263530  | 0.5918290  | 0.0561940  |
| C  | 3.4459010  | -0.8927730 | 0.0442580  |
| H  | 0.4909530  | -1.9229730 | -1.3747500 |
| H  | 1.7917220  | -1.8663260 | 1.0277910  |
| H  | 2.4219620  | -2.7535070 | -0.3401280 |
| H  | 3.0382200  | 0.8388790  | -2.0703380 |
| H  | 2.0860500  | 2.0161320  | -1.2099690 |
| H  | 4.0440790  | 1.1793740  | 0.1201930  |
| H  | 2.5286430  | 0.8315170  | 0.9409660  |
| H  | 4.0536550  | -1.1087810 | -0.8424960 |
| H  | 4.0519290  | -1.1646890 | 0.9100000  |
| H  | 0.6559650  | 0.2498720  | -2.3821390 |

**26. cyclooctene**

|   |            |            |            |
|---|------------|------------|------------|
| C | -3.1036010 | 0.1204180  | -0.9315180 |
| C | -2.3298510 | -0.8712720 | -1.5840960 |
| C | -2.0185180 | -1.8791180 | -0.6090190 |
| C | -3.2360850 | -0.2395730 | 0.4451400  |
| C | -2.5704880 | -1.4853060 | 0.6194650  |
| H | -3.5146090 | 1.0031330  | -1.3950800 |
| H | -2.0806450 | -0.8987350 | -2.6328070 |
| H | -1.4430390 | -2.7741070 | -0.7821950 |

|    |            |            |            |
|----|------------|------------|------------|
| H  | -3.7681230 | 0.3048830  | 1.2071210  |
| H  | -2.4339750 | -1.9898210 | 1.5627320  |
| Ru | -1.1266600 | 0.1063060  | -0.0290510 |
| C  | -1.0043410 | 1.9790660  | -0.0258420 |
| O  | -0.9998730 | 3.1214690  | -0.0405600 |
| Cl | -0.1307730 | 0.1332320  | 2.1802230  |
| C  | 4.3691410  | 0.4324520  | -0.0857650 |
| C  | 3.8745440  | -0.8270950 | 0.6135320  |
| C  | 0.9617640  | 0.5591060  | -1.0041380 |
| C  | 3.0712490  | -1.8231050 | -0.2285810 |
| C  | 0.8045250  | -0.8107520 | -0.9015260 |
| C  | 1.5502860  | -1.7626690 | -0.0086450 |
| H  | 5.2116380  | 0.1767050  | -0.7366240 |
| H  | 3.2772480  | -0.5516360 | 1.4880930  |
| H  | 3.3114780  | -1.7151280 | -1.2923480 |
| H  | 0.6608520  | 0.9963510  | -1.9522720 |
| H  | 0.3832760  | -1.2793410 | -1.7874040 |
| H  | 4.7773430  | 1.0979740  | 0.6811240  |
| H  | 4.7539990  | -1.3327640 | 1.0201670  |
| H  | 3.3885380  | -2.8333870 | 0.0390510  |
| H  | 1.1303510  | -2.7571070 | -0.1819180 |
| H  | 1.3581660  | -1.5341530 | 1.0407450  |
| C  | 3.3488190  | 1.2005240  | -0.9168950 |
| H  | 3.2179690  | 0.6990120  | -1.8815020 |
| H  | 3.7697270  | 2.1783350  | -1.1603770 |
| C  | 1.9699740  | 1.3725790  | -0.2529130 |
| H  | 1.9948980  | 1.0814190  | 0.7976280  |
| H  | 1.6755650  | 2.4226910  | -0.2703910 |

**27. THF**

|    |            |            |            |
|----|------------|------------|------------|
| C  | -2.6700830 | 0.0817540  | -0.7765660 |
| C  | -1.9026850 | -0.7960710 | -1.5904010 |
| C  | -1.4696130 | -1.8716260 | -0.7489820 |
| C  | -2.6604100 | -0.4104460 | 0.5639020  |
| C  | -1.9330670 | -1.6480060 | 0.5506470  |
| H  | -3.1617240 | 0.9820280  | -1.1102340 |
| H  | -1.7379190 | -0.7095700 | -2.6513760 |
| H  | -0.8348210 | -2.6884190 | -1.0572880 |
| H  | -3.1632130 | 0.0209030  | 1.4132850  |
| H  | -1.7022760 | -2.2437660 | 1.4193180  |
| Ru | -0.6712020 | 0.1092510  | -0.0176310 |
| C  | -0.5710060 | 1.9652380  | -0.2276660 |
| O  | -0.6310970 | 3.0982250  | -0.3856570 |
| Cl | 0.4044760  | 0.1721100  | 2.1393560  |
| C  | 2.0854030  | -1.4100110 | -0.2771050 |
| O  | 1.4337230  | -0.1941050 | -0.6976710 |

|   |           |            |            |
|---|-----------|------------|------------|
| C | 2.3617740 | 0.8998200  | -0.6231700 |
| C | 3.7180590 | 0.2479250  | -0.7074800 |
| C | 3.4904260 | -1.0094820 | 0.1190130  |
| H | 1.5200830 | -1.8377230 | 0.5516500  |
| H | 2.0701210 | -2.0954650 | -1.1299510 |
| H | 2.1259000 | 1.5818160  | -1.4405620 |
| H | 2.2245300 | 1.4130270  | 0.3341040  |
| H | 3.9606970 | -0.0050910 | -1.7421560 |
| H | 4.5088860 | 0.8843610  | -0.3143020 |
| H | 4.2170120 | -1.7967010 | -0.0749780 |
| H | 3.5157080 | -0.7658410 | 1.1826330  |

**(H) ( $\mu$ -pdt)Fe<sub>2</sub>(CO)<sub>5</sub>L**

**28. 3-hexyne**

|    |            |            |            |
|----|------------|------------|------------|
| Fe | -0.6607710 | -0.4656660 | 0.5780870  |
| Fe | 1.3593710  | 0.7764400  | -0.3350310 |
| C  | -1.2224840 | -2.0963590 | 1.0059580  |
| O  | -1.5137460 | -3.1698300 | 1.2650860  |
| C  | -1.2094710 | 0.3088170  | 2.1102490  |
| O  | -1.5238930 | 0.7354960  | 3.1181250  |
| C  | 0.8392950  | 1.7411670  | -1.7539050 |
| O  | 0.5153080  | 2.3267740  | -2.6755320 |
| C  | 1.1532810  | 2.1410730  | 0.8112420  |
| O  | 1.0156440  | 3.0099550  | 1.5370430  |
| C  | 3.1175890  | 0.8410560  | -0.7039920 |
| O  | 4.2364890  | 0.9170100  | -0.9055440 |
| S  | 1.3976580  | -0.5875500 | 1.4833940  |
| S  | 0.3582680  | -0.9864440 | -1.3851640 |
| C  | 2.1913830  | -2.1940890 | 1.1149310  |
| H  | 1.5263010  | -2.9610090 | 1.5202640  |
| H  | 3.0977090  | -2.1977470 | 1.7220330  |
| C  | 2.5270140  | -2.4769550 | -0.3270430 |
| H  | 3.2382560  | -1.7346970 | -0.6960810 |
| H  | 3.0425900  | -3.4425890 | -0.3743070 |
| C  | 1.3303850  | -2.5290970 | -1.2419280 |
| H  | 1.6438900  | -2.7672960 | -2.2588930 |
| H  | 0.6297340  | -3.3069970 | -0.9259340 |
| C  | -2.4553910 | -0.3077200 | -0.6333370 |
| C  | -2.1176420 | 0.8606010  | -0.4455840 |
| H  | -3.8073970 | -0.4503100 | -3.0013260 |
| H  | -3.4826190 | 2.4670560  | 1.3054770  |
| C  | -3.2139030 | -1.4379770 | -1.1730690 |
| H  | -2.5230000 | -2.1378480 | -1.6529500 |
| H  | -3.6780040 | -1.9919110 | -0.3515060 |
| C  | -4.2696900 | -0.9711560 | -2.1626570 |
| H  | -4.9717140 | -0.2847190 | -1.6883810 |

|   |            |            |            |
|---|------------|------------|------------|
| H | -4.8344390 | -1.8164950 | -2.5553420 |
| C | -2.6082820 | 2.9528520  | 0.8711610  |
| H | -1.7930170 | 2.8865610  | 1.5896320  |
| H | -2.8391240 | 4.0086260  | 0.7324970  |
| C | -2.2330190 | 2.3248060  | -0.4611690 |
| H | -1.3145810 | 2.7804460  | -0.8319850 |
| H | -3.0058000 | 2.5553500  | -1.2029030 |

**29. cyclohexene**

|    |            |            |            |
|----|------------|------------|------------|
| Fe | 0.5744200  | 0.6534790  | 0.1478820  |
| Fe | -1.3872610 | -0.9506110 | -0.0047870 |
| C  | 0.9966710  | 2.3810910  | 0.1866900  |
| O  | 1.2109580  | 3.5023590  | 0.2136830  |
| C  | 1.4110330  | 0.1280820  | 1.6541630  |
| O  | 1.8551840  | -0.1950090 | 2.6527880  |
| C  | -0.9125030 | -2.2068210 | -1.1897440 |
| O  | -0.6017860 | -2.9977250 | -1.9486150 |
| C  | -0.8597450 | -1.9863580 | 1.3635520  |
| O  | -0.5098010 | -2.6445390 | 2.2251090  |
| C  | -3.1598600 | -1.2638270 | -0.0505980 |
| O  | -4.2753600 | -1.4945800 | -0.0510220 |
| S  | -1.2711110 | 0.8022180  | 1.4367410  |
| S  | -0.8686080 | 0.6190490  | -1.5963550 |
| C  | -2.3298040 | 2.2029270  | 0.9250050  |
| H  | -1.7074690 | 3.0985550  | 0.9975900  |
| H  | -3.0877750 | 2.2710300  | 1.7065840  |
| C  | -2.9808450 | 2.1059710  | -0.4304360 |
| H  | -3.6415060 | 1.2370130  | -0.4654010 |
| H  | -3.6238120 | 2.9828050  | -0.5651440 |
| C  | -2.0042790 | 2.0503560  | -1.5772020 |
| H  | -2.5385190 | 2.0092490  | -2.5269420 |
| H  | -1.3728290 | 2.9426420  | -1.5946690 |
| C  | 2.3772620  | 0.6276050  | -1.2113590 |
| C  | 1.8688710  | -0.6463580 | -1.1535690 |
| H  | 2.0035190  | 1.2834090  | -1.9896300 |
| H  | 1.1462760  | -0.9183040 | -1.9107450 |
| C  | 3.7213610  | 0.9894190  | -0.6489420 |
| H  | 4.3642280  | 1.1846210  | -1.5169280 |
| H  | 3.6898000  | 1.9325920  | -0.0982990 |
| C  | 4.3567830  | -0.1115640 | 0.1885620  |
| H  | 3.9570870  | -0.1046020 | 1.2049460  |
| H  | 5.4261410  | 0.0851840  | 0.2858550  |
| C  | 4.1200190  | -1.4729440 | -0.4400900 |
| H  | 4.6368850  | -2.2531110 | 0.1213170  |
| H  | 4.5447650  | -1.4779780 | -1.4505300 |
| C  | 2.6319950  | -1.7865490 | -0.5230360 |

**30. 2,3-dihydrofuran**

|    |            |            |            |
|----|------------|------------|------------|
| Fe | 0.8315000  | 0.2085080  | 0.5950710  |
| Fe | -1.4519030 | -0.6013870 | -0.1416210 |
| C  | 1.8420010  | 1.6652420  | 0.7730820  |
| O  | 2.4104400  | 2.6503970  | 0.8720000  |
| C  | 0.9251370  | -0.4829600 | 2.2611560  |
| O  | 0.9711380  | -0.9123410 | 3.3155030  |
| C  | -1.0516200 | -2.1027080 | -1.0289000 |
| O  | -0.7835060 | -3.0624100 | -1.5831200 |
| C  | -1.8925900 | -1.5382400 | 1.3265780  |
| O  | -2.1681150 | -2.1240280 | 2.2634770  |
| C  | -3.0841100 | -0.2993620 | -0.8425870 |
| O  | -4.1267830 | -0.1444740 | -1.2746070 |
| S  | -1.1032920 | 1.1542760  | 1.2641230  |
| S  | 0.0295220  | 0.4952350  | -1.4975680 |
| C  | -1.3762690 | 2.7751610  | 0.4651270  |
| H  | -0.5093010 | 3.3909950  | 0.7177570  |
| H  | -2.2369290 | 3.1968070  | 0.9860730  |
| C  | -1.6150300 | 2.7619150  | -1.0218900 |
| H  | -2.5151140 | 2.1866370  | -1.2492000 |
| H  | -1.8181670 | 3.7878650  | -1.3483730 |
| C  | -0.4523540 | 2.2298330  | -1.8193280 |
| H  | -0.6748830 | 2.2722760  | -2.8860710 |
| H  | 0.4444660  | 2.8311170  | -1.6467810 |
| O  | 3.8135190  | -0.1650830 | -0.5729200 |
| C  | 3.0002930  | -0.7169360 | 0.3325800  |
| C  | 3.2878910  | -0.4917220 | -1.8743850 |
| C  | 2.0183020  | -1.5247420 | -0.1818200 |
| H  | 3.3553210  | -0.6482210 | 1.3505080  |
| C  | 2.3282100  | -1.6531730 | -1.6548120 |
| H  | 2.7632350  | 0.3897200  | -2.2518960 |
| H  | 4.1328030  | -0.7119480 | -2.5238190 |
| H  | 1.5832690  | -2.3382730 | 0.3775480  |
| H  | 1.4665930  | -1.5846770 | -2.3172060 |
| H  | 2.8068180  | -2.6199530 | -1.8345500 |

**Monomer Complex without Ligand**

**(A) CpMn(CO)<sub>2</sub>**

|   |            |            |            |
|---|------------|------------|------------|
| C | -1.6363700 | 1.1506690  | -0.0683240 |
| C | -1.9739300 | -0.0000360 | -0.8116880 |
| C | -1.6363440 | -1.1507120 | -0.0682920 |
| C | -1.0686720 | 0.7051720  | 1.1631020  |
| C | -1.0686540 | -0.7051700 | 1.1631210  |

|    |            |            |            |
|----|------------|------------|------------|
| H  | -1.7887550 | 2.1740820  | -0.3685560 |
| H  | -2.3761040 | -0.0000560 | -1.8144020 |
| H  | -1.7887020 | -2.1741400 | -0.3684880 |
| H  | -0.7002340 | 1.3360990  | 1.9558960  |
| H  | -0.7002000 | -1.3360610 | 1.9559360  |
| C  | 1.3250570  | 1.3204320  | -0.1274990 |
| O  | 2.0355810  | 2.1802770  | 0.1352830  |
| C  | 1.3250980  | -1.3204050 | -0.1274880 |
| O  | 2.0356700  | -2.1802140 | 0.1352790  |
| Mn | 0.1274750  | -0.0000050 | -0.4104990 |

**(B) BzCr(CO)<sub>2</sub>**

|    |            |            |            |
|----|------------|------------|------------|
| C  | 1.4379190  | 1.3282810  | -0.1991620 |
| O  | 2.2025060  | 2.1640470  | -0.0119700 |
| C  | 1.4381790  | -1.3281340 | -0.1991210 |
| O  | 2.2030680  | -2.1636450 | -0.0120270 |
| C  | -1.3593820 | 1.4091830  | 0.2946160  |
| C  | -0.7945400 | 0.7029360  | 1.3846950  |
| C  | -0.7944190 | -0.7025410 | 1.3849870  |
| C  | -1.3590960 | -1.4093110 | 0.2951760  |
| C  | -1.8553240 | -0.7109380 | -0.8088960 |
| C  | -1.8554610 | 0.7102670  | -0.8091720 |
| H  | -1.3211400 | 2.4895710  | 0.2736740  |
| H  | -0.3395330 | 1.2429110  | 2.2026920  |
| H  | -0.3393210 | -1.2421000 | 2.2032060  |
| H  | -1.3206380 | -2.4897010 | 0.2746570  |
| H  | -2.2070420 | -1.2537390 | -1.6756620 |
| H  | -2.2072630 | 1.2526530  | -1.6761640 |
| Cr | 0.1392950  | -0.0000530 | -0.3945490 |

**(C) Cr(CO)<sub>5</sub>**

|    |            |            |            |
|----|------------|------------|------------|
| Cr | -0.0001810 | 0.0008410  | -0.3825940 |
| C  | 0.3465760  | -1.8858620 | -0.3876310 |
| C  | -0.3471300 | 1.8878430  | -0.3888290 |
| C  | -1.8867840 | -0.3481050 | -0.3898780 |
| C  | -0.0003600 | 0.0014550  | 1.4620240  |
| C  | 1.8872140  | 0.3455020  | -0.3897250 |
| O  | 0.5523670  | -3.0036340 | -0.3440650 |
| O  | -0.5521180 | 3.0057650  | -0.3460240 |
| O  | -3.0042340 | -0.5557950 | -0.3487330 |
| O  | -0.0006050 | 0.0018630  | 2.6056540  |
| O  | 3.0054960  | 0.5486530  | -0.3485190 |

**(D) CpRe(CO)<sub>2</sub>**

|   |           |            |            |
|---|-----------|------------|------------|
| C | 1.8528080 | -1.1563800 | 0.0928700  |
| C | 2.1955050 | -0.0000420 | -0.6458300 |



|    |            |            |            |
|----|------------|------------|------------|
| C  | 1.8528330  | 1.1563310  | 0.0928290  |
| C  | 1.2278750  | -0.7148340 | 1.3016780  |
| C  | 1.2278930  | 0.7148410  | 1.3016530  |
| H  | 2.0311680  | -2.1775470 | -0.1994110 |
| H  | 2.6372990  | -0.0000630 | -1.6311910 |
| H  | 2.0312140  | 2.1774840  | -0.1994890 |
| H  | 0.8743250  | -1.3431990 | 2.1028210  |
| H  | 0.8743540  | 1.3432440  | 2.1027710  |
| C  | -1.4062030 | -1.3687540 | 0.0586250  |
| O  | -2.1120140 | -2.2234010 | 0.3730570  |
| C  | -1.4061300 | 1.3688050  | 0.0586150  |
| O  | -2.1118740 | 2.2235100  | 0.3730460  |
| Re | -0.1056630 | -0.0000080 | -0.2894260 |

**(E) (DMP)Mn(CO)<sub>2</sub>**

|    |            |            |            |
|----|------------|------------|------------|
| C  | 1.1001500  | -1.2201080 | -0.2546800 |
| C  | 0.7115730  | -1.5313510 | 1.0620640  |
| C  | -0.7141420 | -1.5298760 | 1.0624200  |
| C  | -1.1027770 | -1.2178810 | -0.2540910 |
| N  | -0.0012840 | -0.9986080 | -1.0490020 |
| H  | 1.3724050  | -1.7476420 | 1.8871210  |
| H  | -1.3750120 | -1.7446800 | 1.8878400  |
| C  | -2.4715230 | -1.1814020 | -0.8228380 |
| H  | -2.5315360 | -0.4541450 | -1.6314000 |
| H  | -2.7289320 | -2.1581020 | -1.2373040 |
| H  | -3.2121480 | -0.9305480 | -0.0637940 |
| C  | 2.4687300  | -1.1859810 | -0.8240040 |
| H  | 2.5293180  | -0.4593710 | -1.6331110 |
| H  | 3.2099910  | -0.9355180 | -0.0654530 |
| H  | 2.7247460  | -2.1633170 | -1.2378410 |
| Mn | 0.0006740  | 0.4047390  | 0.5355660  |
| C  | 1.3149560  | 1.5622520  | 0.0707420  |
| C  | -1.3118260 | 1.5640510  | 0.0703170  |
| O  | 2.1622590  | 2.2428290  | -0.2877850 |
| O  | -2.1582030 | 2.2455310  | -0.2886860 |

**(F) TpRe(CO)<sub>2</sub>**

|    |            |            |            |
|----|------------|------------|------------|
| Re | -0.8408700 | -0.0000430 | -0.5297640 |
| C  | -2.1884610 | -1.3282800 | -0.3500570 |
| C  | -2.1886330 | 1.3280350  | -0.3500880 |
| O  | -3.0044900 | 2.1375540  | -0.2176560 |
| O  | -3.0048520 | -2.1372490 | -0.2175630 |
| N  | -0.3673550 | -0.0000040 | 1.4920140  |
| C  | -1.1054470 | -0.0000130 | 2.5978660  |
| C  | 0.9966000  | 0.0000410  | 3.2128380  |
| C  | -0.2821580 | 0.0000210  | 3.7190650  |

|   |            |            |            |
|---|------------|------------|------------|
| H | -2.1807920 | -0.0000380 | 2.5227070  |
| H | 1.9542760  | 0.0000660  | 3.7064490  |
| H | -0.5809280 | 0.0000250  | 4.7520110  |
| N | 0.8081180  | -1.4618150 | -0.7202480 |
| C | 0.9428610  | -2.6198740 | -1.3604110 |
| C | 2.1958350  | -3.1694930 | -1.1075310 |
| H | 0.1302480  | -3.0019750 | -1.9584790 |
| C | 2.8023140  | -2.2658550 | -0.2626420 |
| H | 2.5983080  | -4.0945830 | -1.4799650 |
| H | 3.7742060  | -2.2740400 | 0.2031280  |
| N | 0.8080580  | 1.4617990  | -0.7202760 |
| C | 0.9427490  | 2.6198500  | -1.3604620 |
| C | 2.1956720  | 3.1695670  | -1.1075350 |
| H | 0.1301320  | 3.0018850  | -1.9585660 |
| C | 2.8021930  | 2.2659730  | -0.2626300 |
| H | 2.5980890  | 4.0946840  | -1.4799620 |
| H | 3.7740730  | 2.2742290  | 0.2031660  |
| B | 2.0933030  | 0.0000380  | 0.8472800  |
| H | 3.1455080  | 0.0000650  | 1.4158920  |
| N | 1.9556110  | 1.2509200  | -0.0443270 |
| N | 0.9326530  | 0.0000250  | 1.8715470  |
| N | 1.9556630  | -1.2508660 | -0.0443080 |

**(G) CpRu(CO)(Cl)**

|    |            |            |            |
|----|------------|------------|------------|
| C  | -1.6208660 | 1.2548240  | 0.0007000  |
| C  | -1.6243360 | 0.4180040  | -1.1448470 |
| C  | -1.7543900 | -0.9442670 | -0.6973440 |
| C  | -1.6231220 | 0.4174230  | 1.1457940  |
| C  | -1.7536750 | -0.9446280 | 0.6977730  |
| H  | -1.5552090 | 2.3307170  | 0.0009500  |
| H  | -1.5979300 | 0.7447600  | -2.1715610 |
| H  | -1.7618960 | -1.8143570 | -1.3341260 |
| H  | -1.5953830 | 0.7436030  | 2.1726580  |
| H  | -1.7603770 | -1.8150220 | 1.3341480  |
| Ru | 0.1374510  | -0.0221060 | -0.0004150 |
| C  | 1.3386390  | 1.4519020  | -0.0002290 |
| O  | 1.9235530  | 2.4311060  | 0.0003300  |
| Cl | 1.7094720  | -1.6814950 | 0.0001440  |

**(H) (μ-pdt)Fe<sub>2</sub>(CO)<sub>5</sub>**

|    |            |            |            |
|----|------------|------------|------------|
| Fe | 1.1784560  | 0.6505560  | 0.4587540  |
| Fe | -1.1964170 | 0.0626840  | 0.0274080  |
| C  | 2.9145950  | 0.2189480  | 0.4555790  |
| O  | 3.9981910  | -0.1243200 | 0.3629020  |
| C  | 1.2862460  | 2.3346510  | -0.1983210 |
| O  | 1.3288860  | 3.3911940  | -0.6182200 |

|   |            |            |            |
|---|------------|------------|------------|
| C | -1.9449690 | 0.7155600  | 1.5271720  |
| O | -2.4066530 | 1.1298790  | 2.4810960  |
| C | -1.7311150 | 1.4974950  | -0.9076850 |
| O | -2.0519900 | 2.4113070  | -1.5050720 |
| C | -2.4673990 | -1.1314630 | -0.4584980 |
| O | -3.2876950 | -1.8627490 | -0.7544450 |
| S | 0.4903120  | -0.1132570 | -1.4851680 |
| S | 0.2148220  | -1.0802690 | 1.4284140  |
| C | 1.0749590  | -1.8363120 | -1.6694550 |
| H | 2.1646170  | -1.7936220 | -1.5913960 |
| H | 0.8363680  | -2.0963120 | -2.7022320 |
| C | 0.5010550  | -2.8645470 | -0.7277680 |
| H | -0.5839220 | -2.9099220 | -0.8450210 |
| H | 0.8803770  | -3.8485760 | -1.0247790 |
| C | 0.8472500  | -2.6474050 | 0.7260510  |
| H | 0.4288400  | -3.4448180 | 1.3401750  |
| H | 1.9289110  | -2.6386060 | 0.8785760  |
